# Supplementary material for: Emergence of power-law distributions in protein-protein interaction networks through study bias
Source: bioRxiv preprint, doi:10.1101/2023.03.17.533165, version 2 (2024-08-10)
Supplement: supplementary table 1 [file 533165_file03.xlsx]

## Sheet: enrichGO_Uncorrected_hubs
ID	Description	GeneRatio	BgRatio	pvalue	p.adjust	qvalue	geneID	Count
GO:0048145	regulation of fibroblast proliferation	8/50	77/15723	1.03665750033645e-10	1.69618931852787e-07	9.12928759198137e-08	ESR1/JUN/EGFR/BMI1/TP53/MYC/FN1/CTNNB1	8
GO:0048144	fibroblast proliferation	8/50	79/15723	1.27917746495314e-10	1.69618931852787e-07	9.12928759198137e-08	ESR1/JUN/EGFR/BMI1/TP53/MYC/FN1/CTNNB1	8
GO:0031647	regulation of protein stability	11/50	289/15723	1.32290003172443e-09	1.1694436280444e-06	6.29421909830993e-07	LRRK2/CUL3/SUMO1/TP53/HTT/HSPA8/HSP90AA1/LMNA/MDM2/TNIP2/HSP90AB1	11
GO:0048146	positive regulation of fibroblast proliferation	6/50	47/15723	7.37565505552468e-09	4.89005930181287e-06	2.63194427770828e-06	ESR1/JUN/EGFR/BMI1/MYC/FN1	6
GO:0034504	protein localization to nucleus	10/50	290/15723	2.08997765052744e-08	1.10852414583975e-05	5.96633619813727e-06	ELAVL1/LRRK2/XPO1/SUMO1/TP53/LMNA/MDM2/LARP7/HSP90AB1/MEPCE	10
GO:2000058	regulation of ubiquitin-dependent protein catabolic process	8/50	162/15723	3.97041305426726e-08	1.57756670866959e-05	8.49083296402305e-06	SUMO2/LRRK2/XPO1/SUMO1/MDM2/DISC1/HSP90AB1/CDK2	8
GO:0043161	proteasome-mediated ubiquitin-dependent protein catabolic process	11/50	403/15723	4.1640146910585e-08	1.57756670866959e-05	8.49083296402305e-06	TRIM25/SUMO2/LRRK2/RNF4/XPO1/CUL3/SUMO1/MDM2/HSP90AB1/CDK2/CTNNB1	11
GO:1903362	regulation of cellular protein catabolic process	9/50	252/15723	8.54680205564167e-08	2.83326488144521e-05	1.52492941940133e-05	SUMO2/LRRK2/XPO1/SUMO1/HSP90AA1/MDM2/DISC1/HSP90AB1/CDK2	9
GO:0032434	regulation of proteasomal ubiquitin-dependent protein catabolic process	7/50	134/15723	2.05364175223564e-07	5.68125109405512e-05	3.05778220351621e-05	SUMO2/LRRK2/XPO1/SUMO1/MDM2/HSP90AB1/CDK2	7
GO:0017038	protein import	8/50	205/15723	2.4452274996459e-07	5.68125109405512e-05	3.05778220351621e-05	ELAVL1/LRRK2/SUMO1/TP53/HSPA8/HSP90AA1/LMNA/HSP90AB1	8
GO:1901987	regulation of cell cycle phase transition	10/50	378/15723	2.4971319045643e-07	5.68125109405512e-05	3.05778220351621e-05	APP/EGFR/CUL3/TP53/BRCA1/MDM2/CDK2/NPM1/CDC5L/MEPCE	10
GO:0010498	proteasomal protein catabolic process	11/50	483/15723	2.5940204997189e-07	5.68125109405512e-05	3.05778220351621e-05	TRIM25/SUMO2/LRRK2/RNF4/XPO1/CUL3/SUMO1/MDM2/HSP90AB1/CDK2/CTNNB1	11
GO:0042176	regulation of protein catabolic process	10/50	388/15723	3.17681309142614e-07	5.68125109405512e-05	3.05778220351621e-05	SUMO2/LRRK2/EGFR/XPO1/SUMO1/HSP90AA1/MDM2/DISC1/HSP90AB1/CDK2	10
GO:0044770	cell cycle phase transition	11/50	497/15723	3.44953633888404e-07	5.68125109405512e-05	3.05778220351621e-05	APP/EGFR/CUL3/TP53/BRCA1/MYC/MDM2/CDK2/NPM1/CDC5L/MEPCE	11
GO:0051972	regulation of telomerase activity	5/50	47/15723	3.67378149730472e-07	5.68125109405512e-05	3.05778220351621e-05	TP53/MYC/HSP90AA1/HSP90AB1/CTNNB1	5
GO:1903050	regulation of proteolysis involved in cellular protein catabolic process	8/50	217/15723	3.77455379630903e-07	5.68125109405512e-05	3.05778220351621e-05	SUMO2/LRRK2/XPO1/SUMO1/MDM2/DISC1/HSP90AB1/CDK2	8
GO:0006913	nucleocytoplasmic transport	9/50	301/15723	3.85605277877044e-07	5.68125109405512e-05	3.05778220351621e-05	ELAVL1/LRRK2/XPO1/SUMO1/NXF1/TP53/LMNA/HSP90AB1/NPM1	9
GO:0051169	nuclear transport	9/50	301/15723	3.85605277877044e-07	5.68125109405512e-05	3.05778220351621e-05	ELAVL1/LRRK2/XPO1/SUMO1/NXF1/TP53/LMNA/HSP90AB1/NPM1	9
GO:0051090	regulation of DNA-binding transcription factor activity	10/50	420/15723	6.56732908840741e-07	9.09377550680424e-05	4.89448264953026e-05	APP/ESR2/ESR1/TRIM25/NTRK1/SUMO1/COPS5/CTNNB1/NPM1/RNF2	10
GO:0009314	response to radiation	10/50	422/15723	6.85805091010877e-07	9.09377550680424e-05	4.89448264953026e-05	APP/NTRK1/EGFR/TP53/BRCA1/MYC/GRB2/MDM2/PCLAF/NPM1	10
GO:0031058	positive regulation of histone modification	6/50	102/15723	8.10426018295758e-07	0.000102345228596207	5.50845955292756e-05	LRRK2/TP53/BRCA1/LMNA/CTNNB1/SNW1	6
GO:0031331	positive regulation of cellular catabolic process	10/50	440/15723	1.00259848220334e-06	0.000120858689763785	6.50489732951069e-05	APP/SUMO2/LRRK2/SUMO1/HTT/MYC/MOV10/HSP90AA1/MDM2/DISC1	10
GO:0007346	regulation of mitotic cell cycle	10/50	444/15723	1.08829277369757e-06	0.000125484888515042	6.75389016537258e-05	APP/EGFR/CUL3/TP53/BRCA1/MYC/MDM2/CDK2/CTNNB1/MEPCE	10
GO:1901989	positive regulation of cell cycle phase transition	6/50	111/15723	1.33358358715088e-06	0.000147360986380173	7.93131291305526e-05	APP/EGFR/CUL3/MDM2/NPM1/MEPCE	6
GO:0051091	positive regulation of DNA-binding transcription factor activity	8/50	258/15723	1.39521954687601e-06	0.000148004889532608	7.96596928658474e-05	APP/ESR2/ESR1/TRIM25/NTRK1/COPS5/CTNNB1/NPM1	8
GO:0045862	positive regulation of proteolysis	9/50	356/15723	1.56143349868333e-06	0.0001592662168657	8.57208025997811e-05	APP/SUMO2/LRRK2/EGLN3/SUMO1/MYC/MDM2/FN1/DISC1	9
GO:0051098	regulation of binding	9/50	358/15723	1.63532880822818e-06	0.00016062562960819	8.64524703297238e-05	APP/JUN/LRRK2/SUMO1/MYC/DISC1/HSP90AB1/CTNNB1/MEPCE	9
GO:0061136	regulation of proteasomal protein catabolic process	7/50	185/15723	1.81581196543306e-06	0.000171983333297446	9.25654520724522e-05	SUMO2/LRRK2/XPO1/SUMO1/MDM2/HSP90AB1/CDK2	7
GO:0071824	protein-DNA complex subunit organization	7/50	196/15723	2.66690434391199e-06	0.000243853014872846	0.000131247395478122	ESR1/RNF4/TP53/MYC/MCM2/H3C1/NPM1	7
GO:0000082	G1/S transition of mitotic cell cycle	7/50	197/15723	2.75851826779238e-06	0.000243853014872846	0.000131247395478122	EGFR/CUL3/TP53/MYC/MDM2/CDK2/MEPCE	7
GO:1901990	regulation of mitotic cell cycle phase transition	8/50	289/15723	3.2492252401596e-06	0.000277965978609782	0.00014960779034487	APP/EGFR/CUL3/TP53/BRCA1/MDM2/CDK2/MEPCE	8
GO:0007098	centrosome cycle	6/50	130/15723	3.3555161565332e-06	0.000277986315466172	0.000149618736116587	XPO1/BRCA1/PCLAF/CDK2/CTNNB1/NPM1	6
GO:1902692	regulation of neuroblast proliferation	4/50	33/15723	3.45910573543879e-06	0.000277986315466172	0.000149618736116587	LRRK2/TP53/DISC1/CTNNB1	4
GO:0051865	protein autoubiquitination	5/50	75/15723	3.86641537578222e-06	0.000296353733068604	0.000159504509820206	LRRK2/RNF4/CUL3/BRCA1/MDM2	5
GO:0051973	positive regulation of telomerase activity	4/50	34/15723	3.91115409404267e-06	0.000296353733068604	0.000159504509820206	MYC/HSP90AA1/HSP90AB1/CTNNB1	4
GO:0035195	miRNA-mediated gene silencing	5/50	76/15723	4.12883471511719e-06	0.0003041574906803	0.000163704674669559	ESR1/ELAVL1/EGFR/TP53/MOV10	5
GO:0016032	viral process	9/50	404/15723	4.40159195029375e-06	0.000307184785583658	0.000165334035584441	TRIM25/JUN/EGFR/TP53/HSPA8/LARP7/HEXIM1/HSP90AB1/SNW1	9
GO:0044772	mitotic cell cycle phase transition	9/50	404/15723	4.40159195029375e-06	0.000307184785583658	0.000165334035584441	APP/EGFR/CUL3/TP53/BRCA1/MYC/MDM2/CDK2/MEPCE	9
GO:0031023	microtubule organizing center organization	6/50	143/15723	5.82408057856708e-06	0.000392543037369752	0.000211275842928231	XPO1/BRCA1/PCLAF/CDK2/CTNNB1/NPM1	6
GO:0035194	post-transcriptional gene silencing by RNA	5/50	82/15723	6.01116933707467e-06	0.000392543037369752	0.000211275842928231	ESR1/ELAVL1/EGFR/TP53/MOV10	5
GO:0044843	cell cycle G1/S phase transition	7/50	222/15723	6.0687271991553e-06	0.000392543037369752	0.000211275842928231	EGFR/CUL3/TP53/MYC/MDM2/CDK2/MEPCE	7
GO:0060964	regulation of miRNA-mediated gene silencing	4/50	39/15723	6.85599795691412e-06	0.000432907299565149	0.000233000832821442	ESR1/ELAVL1/EGFR/TP53	4
GO:0060560	developmental growth involved in morphogenesis	7/50	228/15723	7.22778867180242e-06	0.000445769664130698	0.000239923658236575	APP/ESR1/HSP90AA1/FN1/DISC1/HSP90AB1/CTNNB1	7
GO:0016441	post-transcriptional gene silencing	5/50	86/15723	7.59963280765467e-06	0.00045805059558864	0.000246533542755496	ESR1/ELAVL1/EGFR/TP53/MOV10	5
GO:0060147	regulation of post-transcriptional gene silencing	4/50	41/15723	8.4019052608015e-06	0.000481759878489568	0.000259294433290408	ESR1/ELAVL1/EGFR/TP53	4
GO:1900368	regulation of post-transcriptional gene silencing by RNA	4/50	41/15723	8.4019052608015e-06	0.000481759878489568	0.000259294433290408	ESR1/ELAVL1/EGFR/TP53	4
GO:0051402	neuron apoptotic process	7/50	234/15723	8.56543985106178e-06	0.000481759878489568	0.000259294433290408	APP/NTRK1/JUN/EGLN3/TP53/HSP90AB1/CTNNB1	7
GO:1901992	positive regulation of mitotic cell cycle phase transition	5/50	89/15723	8.99301245244635e-06	0.000481759878489568	0.000259294433290408	APP/EGFR/CUL3/MDM2/MEPCE	5
GO:0006606	protein import into nucleus	6/50	155/15723	9.25318433917491e-06	0.000481759878489568	0.000259294433290408	ELAVL1/LRRK2/SUMO1/TP53/LMNA/HSP90AB1	6
GO:1903364	positive regulation of cellular protein catabolic process	6/50	155/15723	9.25318433917491e-06	0.000481759878489568	0.000259294433290408	SUMO2/LRRK2/SUMO1/HSP90AA1/MDM2/DISC1	6
GO:0060966	regulation of gene silencing by RNA	4/50	42/15723	9.2646130478763e-06	0.000481759878489568	0.000259294433290408	ESR1/ELAVL1/EGFR/TP53	4
GO:1903320	regulation of protein modification by small protein conjugation or removal	7/50	238/15723	9.56677670898933e-06	0.000487905612158456	0.000262602210878331	LRRK2/CUL3/BMI1/BRCA1/HSP90AA1/HSP90AB1/CTNNB1	7
GO:0051170	import into nucleus	6/50	159/15723	1.07051057615275e-05	0.000535659254331525	0.000288304337887413	ELAVL1/LRRK2/SUMO1/TP53/LMNA/HSP90AB1	6
GO:0070997	neuron death	8/50	343/15723	1.14148600503882e-05	0.000560596460252399	0.000301726125308507	APP/NTRK1/JUN/LRRK2/EGLN3/TP53/HSP90AB1/CTNNB1	8
GO:0051052	regulation of DNA metabolic process	9/50	457/15723	1.18886120657011e-05	0.00056406439654627	0.000303592649724832	EGFR/TP53/BRCA1/MYC/HSP90AA1/HSP90AB1/CDK2/CTNNB1/NPM1	9
GO:0065004	protein-DNA complex assembly	6/50	162/15723	1.19108620688503e-05	0.00056406439654627	0.000303592649724832	ESR1/RNF4/TP53/MCM2/H3C1/NPM1	6
GO:0060965	negative regulation of miRNA-mediated gene silencing	3/50	15/15723	1.34030134295189e-05	0.000621354783529344	0.000334427675821938	ESR1/ELAVL1/TP53	3
GO:0016049	cell growth	9/50	465/15723	1.36544048846705e-05	0.000621354783529344	0.000334427675821938	APP/ESR2/EGFR/TP53/HSP90AA1/FN1/DISC1/HSP90AB1/CTNNB1	9
GO:0045786	negative regulation of cell cycle	8/50	353/15723	1.40578005323381e-05	0.000621354783529344	0.000334427675821938	TP53/BRCA1/MDM2/HEXIM1/CDK2/CTNNB1/NPM1/CDC5L	8
GO:2001233	regulation of apoptotic signaling pathway	8/50	353/15723	1.40578005323381e-05	0.000621354783529344	0.000334427675821938	LRRK2/TP53/BRCA1/HTT/MYC/LMNA/MDM2/CTNNB1	8
GO:0060149	negative regulation of post-transcriptional gene silencing	3/50	16/15723	1.64590706096005e-05	0.00069284849613747	0.000372907263936814	ESR1/ELAVL1/TP53	3
GO:0060967	negative regulation of gene silencing by RNA	3/50	16/15723	1.64590706096005e-05	0.00069284849613747	0.000372907263936814	ESR1/ELAVL1/TP53	3
GO:1900369	negative regulation of post-transcriptional gene silencing by RNA	3/50	16/15723	1.64590706096005e-05	0.00069284849613747	0.000372907263936814	ESR1/ELAVL1/TP53	3
GO:0051054	positive regulation of DNA metabolic process	7/50	260/15723	1.69766434848175e-05	0.000695490121786333	0.000374329048639465	EGFR/BRCA1/MYC/HSP90AA1/HSP90AB1/CDK2/CTNNB1	7
GO:0031062	positive regulation of histone methylation	4/50	49/15723	1.72524421911425e-05	0.000695490121786333	0.000374329048639465	BRCA1/LMNA/CTNNB1/SNW1	4
GO:0031056	regulation of histone modification	6/50	173/15723	1.73085776915151e-05	0.000695490121786333	0.000374329048639465	LRRK2/TP53/BRCA1/LMNA/CTNNB1/SNW1	6
GO:0042770	signal transduction in response to DNA damage	6/50	174/15723	1.78837038914594e-05	0.000707874368957466	0.00038099454009142	TP53/BRCA1/GRB2/MDM2/CDK2/CDC5L	6
GO:0016925	protein sumoylation	4/50	50/15723	1.87088439750652e-05	0.000729644915027543	0.00039271195712366	SUMO2/SUMO1/MDM2/CTNNB1	4
GO:0016570	histone modification	9/50	485/15723	1.90789385434254e-05	0.000733294855321222	0.000394676440349121	LRRK2/BMI1/TP53/BRCA1/LMNA/CDK2/CTNNB1/SNW1/RNF2	9
GO:1902749	regulation of cell cycle G2/M phase transition	5/50	105/15723	2.01374058038504e-05	0.000749215552679084	0.00040324533199684	APP/TP53/BRCA1/CDK2/NPM1	5
GO:0019083	viral transcription	4/50	51/15723	2.02536602180254e-05	0.000749215552679084	0.00040324533199684	JUN/LARP7/HEXIM1/SNW1	4
GO:0071478	cellular response to radiation	6/50	178/15723	2.03406937378937e-05	0.000749215552679084	0.00040324533199684	TP53/BRCA1/MYC/GRB2/MDM2/NPM1	6
GO:2000060	positive regulation of ubiquitin-dependent protein catabolic process	5/50	106/15723	2.10839663431337e-05	0.000765954503314938	0.00041225462669487	SUMO2/LRRK2/SUMO1/MDM2/DISC1	5
GO:0031047	gene silencing by RNA	5/50	108/15723	2.30808134420639e-05	0.000827166449302074	0.000445200327559582	ESR1/ELAVL1/EGFR/TP53/MOV10	5
GO:0044403	biological process involved in symbiotic interaction	7/50	278/15723	2.61124017256341e-05	0.000923334525018422	0.000496960234946805	TRIM25/JUN/EGFR/HSPA8/FN1/HSP90AB1/SNW1	7
GO:0071897	DNA biosynthetic process	6/50	187/15723	2.68718838825366e-05	0.000937687316532725	0.000504685243001657	TP53/MYC/HSP90AA1/PCLAF/HSP90AB1/CTNNB1	6
GO:1905289	regulation of CAMKK-AMPK signaling cascade	2/50	3/15723	2.96728477352548e-05	0.00102197911940124	0.000550053062597479	LRRK2/HTT	2
GO:0000077	DNA damage checkpoint signaling	5/50	115/15723	3.12527425420251e-05	0.00104452147536897	0.000562185885766579	TP53/BRCA1/MDM2/CDK2/CDC5L	5
GO:0097193	intrinsic apoptotic signaling pathway	7/50	286/15723	3.13086643314473e-05	0.00104452147536897	0.000562185885766579	LRRK2/CUL3/TP53/BRCA1/MYC/MDM2/SNW1	7
GO:0051656	establishment of organelle localization	8/50	395/15723	3.15089434500442e-05	0.00104452147536897	0.000562185885766579	LRRK2/XPO1/CUL3/HTT/YWHAZ/COPS5/CTNNB1/NPM1	8
GO:0044346	fibroblast apoptotic process	3/50	20/15723	3.32068754659166e-05	0.0010800586246787	0.00058131281061535	CUL3/TP53/MYC	3
GO:0022029	telencephalon cell migration	4/50	58/15723	3.3827562324724e-05	0.0010800586246787	0.00058131281061535	LRRK2/EGFR/DISC1/CTNNB1	4
GO:0045931	positive regulation of mitotic cell cycle	5/50	117/15723	3.39562714334904e-05	0.0010800586246787	0.00058131281061535	APP/EGFR/CUL3/MDM2/MEPCE	5
GO:1903311	regulation of mRNA metabolic process	7/50	290/15723	3.42100016866555e-05	0.0010800586246787	0.00058131281061535	ELAVL1/HNRNPL/MOV10/HSPA8/LARP7/NPM1/SNW1	7
GO:2000278	regulation of DNA biosynthetic process	5/50	118/15723	3.53743197011797e-05	0.00110367877467681	0.000594025727737458	TP53/MYC/HSP90AA1/HSP90AB1/CTNNB1	5
GO:0050807	regulation of synapse organization	6/50	199/15723	3.810500142605e-05	0.00117505190444052	0.000632440415345456	APP/NTRK1/LRRK2/HSPA8/YWHAZ/DISC1	6
GO:0007405	neuroblast proliferation	4/50	60/15723	3.86983619889546e-05	0.00117963282752537	0.000634905975281577	LRRK2/TP53/DISC1/CTNNB1	4
GO:0043523	regulation of neuron apoptotic process	6/50	201/15723	4.0298043563456e-05	0.00121443649466233	0.000653638122871367	NTRK1/JUN/EGLN3/TP53/HSP90AB1/CTNNB1	6
GO:0021885	forebrain cell migration	4/50	61/15723	4.13173352138286e-05	0.0012232192788995	0.000658365222746574	LRRK2/EGFR/DISC1/CTNNB1	4
GO:0032355	response to estradiol	5/50	122/15723	4.15119664784898e-05	0.0012232192788995	0.000658365222746574	ESR2/ESR1/EGFR/MYC/CTNNB1	5
GO:0072594	establishment of protein localization to organelle	8/50	412/15723	4.25002455346843e-05	0.00123857858415366	0.000666631960035071	ELAVL1/LRRK2/SUMO1/TP53/HSPA8/HSP90AA1/LMNA/HSP90AB1	8
GO:0031570	DNA integrity checkpoint signaling	5/50	123/15723	4.31679124869988e-05	0.00124436199908175	0.000669744729203323	TP53/BRCA1/MDM2/CDK2/CDC5L	5
GO:0070920	regulation of production of small RNA involved in gene silencing by RNA	3/50	22/15723	4.46578090716593e-05	0.00125588333100924	0.000675945779490567	ESR1/EGFR/TP53	3
GO:1903798	regulation of production of miRNAs involved in gene silencing by miRNA	3/50	22/15723	4.46578090716593e-05	0.00125588333100924	0.000675945779490567	ESR1/EGFR/TP53	3
GO:0050803	regulation of synapse structure or activity	6/50	205/15723	4.49882792028198e-05	0.00125588333100924	0.000675945779490567	APP/NTRK1/LRRK2/HSPA8/YWHAZ/DISC1	6
GO:1901214	regulation of neuron death	7/50	304/15723	4.61651491013351e-05	0.00126384708672755	0.000680232059062694	NTRK1/JUN/LRRK2/EGLN3/TP53/HSP90AB1/CTNNB1	7
GO:0031396	regulation of protein ubiquitination	6/50	206/15723	4.62266845447104e-05	0.00126384708672755	0.000680232059062694	LRRK2/CUL3/BMI1/BRCA1/HSP90AA1/HSP90AB1	6
GO:0033044	regulation of chromosome organization	6/50	208/15723	4.87855586865196e-05	0.0013160322555375	0.000708319337345737	RNF4/CUL3/MYC/MCM2/CDK2/CTNNB1	6
GO:0070371	ERK1 and ERK2 cascade	7/50	307/15723	4.91279009420108e-05	0.0013160322555375	0.000708319337345737	APP/NTRK1/JUN/EGFR/MYC/YWHAZ/FN1	7
GO:0045787	positive regulation of cell cycle	7/50	308/15723	5.01495164522357e-05	0.00132996517631329	0.000715818361149806	APP/EGFR/CUL3/MYC/MDM2/NPM1/MEPCE	7
GO:0071456	cellular response to hypoxia	5/50	128/15723	5.22302311623025e-05	0.00137143141626165	0.000738136461241087	EGLN3/TP53/MYC/LMNA/MDM2	5
GO:0043414	macromolecule methylation	7/50	313/15723	5.55230413757387e-05	0.00144359907576921	0.00077697878333851	BRCA1/MYC/LMNA/LARP7/CTNNB1/SNW1/MEPCE	7
GO:0043627	response to estrogen	4/50	66/15723	5.63992701351454e-05	0.00145214431454763	0.00078157803069246	ESR1/TRIM25/BRCA1/MYC	4
GO:0048588	developmental cell growth	6/50	215/15723	5.86506453656243e-05	0.00146789247685234	0.000790054059939579	APP/HSP90AA1/FN1/DISC1/HSP90AB1/CTNNB1	6
GO:0071241	cellular response to inorganic substance	6/50	215/15723	5.86506453656243e-05	0.00146789247685234	0.000790054059939579	APP/JUN/LRRK2/EGFR/SUMO1/CDK2	6
GO:0072717	cellular response to actinomycin D	2/50	4/15723	5.92249227085975e-05	0.00146789247685234	0.000790054059939579	TP53/MDM2	2
GO:1905382	positive regulation of snRNA transcription by RNA polymerase II	2/50	4/15723	5.92249227085975e-05	0.00146789247685234	0.000790054059939579	LARP7/MEPCE	2
GO:1900180	regulation of protein localization to nucleus	5/50	132/15723	6.04858001844364e-05	0.00147163616595528	0.000792069000966641	SUMO1/LMNA/LARP7/HSP90AB1/MEPCE	5
GO:1903052	positive regulation of proteolysis involved in cellular protein catabolic process	5/50	132/15723	6.04858001844364e-05	0.00147163616595528	0.000792069000966641	SUMO2/LRRK2/SUMO1/MDM2/DISC1	5
GO:2000045	regulation of G1/S transition of mitotic cell cycle	5/50	133/15723	6.26989030418771e-05	0.00151161355333689	0.000813585765787419	EGFR/TP53/MDM2/CDK2/MEPCE	5
GO:2001234	negative regulation of apoptotic signaling pathway	6/50	221/15723	6.83233792852362e-05	0.00163237479157159	0.00087858228839052	LRRK2/BRCA1/HTT/LMNA/MDM2/CTNNB1	6
GO:0036294	cellular response to decreased oxygen levels	5/50	136/15723	6.97152367980654e-05	0.00165075721418276	0.000888476138140758	EGLN3/TP53/MYC/LMNA/MDM2	5
GO:0032200	telomere organization	5/50	137/15723	7.21837211953177e-05	0.00169408166911489	0.000911794372993487	MYC/HSP90AA1/HSP90AB1/H3C1/CTNNB1	5
GO:0010212	response to ionizing radiation	5/50	141/15723	8.27391570918745e-05	0.00189839841700048	0.00102176242496335	TP53/BRCA1/MYC/GRB2/MDM2	5
GO:0051298	centrosome duplication	4/50	73/15723	8.37922314407716e-05	0.00189839841700048	0.00102176242496335	XPO1/BRCA1/CDK2/NPM1	4
GO:2000573	positive regulation of DNA biosynthetic process	4/50	73/15723	8.37922314407716e-05	0.00189839841700048	0.00102176242496335	MYC/HSP90AA1/HSP90AB1/CTNNB1	4
GO:0051571	positive regulation of histone H3-K4 methylation	3/50	27/15723	8.38760774101018e-05	0.00189839841700048	0.00102176242496335	BRCA1/CTNNB1/SNW1	3
GO:0045732	positive regulation of protein catabolic process	6/50	230/15723	8.51845443525858e-05	0.00189839841700048	0.00102176242496335	SUMO2/LRRK2/SUMO1/HSP90AA1/MDM2/DISC1	6
GO:0090068	positive regulation of cell cycle process	6/50	230/15723	8.51845443525858e-05	0.00189839841700048	0.00102176242496335	APP/EGFR/CUL3/MDM2/NPM1/MEPCE	6
GO:0071479	cellular response to ionizing radiation	4/50	74/15723	8.83736575079202e-05	0.00193844752933393	0.0010433177938306	TP53/BRCA1/GRB2/MDM2	4
GO:0009411	response to UV	5/50	143/15723	8.84434958708165e-05	0.00193844752933393	0.0010433177938306	EGFR/TP53/MYC/PCLAF/NPM1	5
GO:0045899	positive regulation of RNA polymerase II transcription preinitiation complex assembly	2/50	5/15723	9.8507367894445e-05	0.00207334555282594	0.0011159230648694	ESR1/TP53	2
GO:0051097	negative regulation of helicase activity	2/50	5/15723	9.8507367894445e-05	0.00207334555282594	0.0011159230648694	TP53/MCM2	2
GO:0071681	cellular response to indole-3-methanol	2/50	5/15723	9.8507367894445e-05	0.00207334555282594	0.0011159230648694	BRCA1/CTNNB1	2
GO:0072716	response to actinomycin D	2/50	5/15723	9.8507367894445e-05	0.00207334555282594	0.0011159230648694	TP53/MDM2	2
GO:1905380	regulation of snRNA transcription by RNA polymerase II	2/50	5/15723	9.8507367894445e-05	0.00207334555282594	0.0011159230648694	LARP7/MEPCE	2
GO:0006513	protein monoubiquitination	4/50	77/15723	0.00010321223682616	0.00211172771991547	0.00113658124482233	TRIM25/CUL3/BMI1/RNF2	4
GO:0072332	intrinsic apoptotic signaling pathway by p53 class mediator	4/50	77/15723	0.00010321223682616	0.00211172771991547	0.00113658124482233	TP53/MYC/MDM2/SNW1	4
GO:0010464	regulation of mesenchymal cell proliferation	3/50	29/15723	0.000104312342122521	0.00211172771991547	0.00113658124482233	MYC/LMNA/CTNNB1	3
GO:0031571	mitotic G1 DNA damage checkpoint signaling	3/50	29/15723	0.000104312342122521	0.00211172771991547	0.00113658124482233	TP53/MDM2/CDK2	3
GO:0044819	mitotic G1/S transition checkpoint signaling	3/50	29/15723	0.000104312342122521	0.00211172771991547	0.00113658124482233	TP53/MDM2/CDK2	3
GO:0044839	cell cycle G2/M phase transition	5/50	149/15723	0.000107388184024312	0.00215752624267026	0.00116123108083706	APP/TP53/BRCA1/CDK2/NPM1	5
GO:0031060	regulation of histone methylation	4/50	78/15723	0.000108537463992836	0.00216422071059398	0.00116483420003391	BRCA1/LMNA/CTNNB1/SNW1	4
GO:0071453	cellular response to oxygen levels	5/50	151/15723	0.000114349499833594	0.0022593041897484	0.00121601035218656	EGLN3/TP53/MYC/LMNA/MDM2	5
GO:1902253	regulation of intrinsic apoptotic signaling pathway by p53 class mediator	3/50	30/15723	0.00011564338414463	0.0022593041897484	0.00121601035218656	TP53/MYC/MDM2	3
GO:0032259	methylation	7/50	352/15723	0.000115861753320431	0.0022593041897484	0.00121601035218656	BRCA1/MYC/LMNA/LARP7/CTNNB1/SNW1/MEPCE	7
GO:0044089	positive regulation of cellular component biogenesis	8/50	477/15723	0.000118463060992188	0.00229316815876849	0.00123423673227359	ESR1/NTRK1/SUMO1/TP53/HTT/GRB2/HSP90AA1/CDK2	8
GO:0044773	mitotic DNA damage checkpoint signaling	4/50	81/15723	0.000125711000464293	0.00241583748718336	0.00130026023363525	TP53/BRCA1/MDM2/CDK2	4
GO:0035966	response to topologically incorrect protein	5/50	155/15723	0.000129308250370212	0.00246708978404175	0.00132784541841732	CUL3/HSPA8/HSP90AA1/COPS5/HSP90AB1	5
GO:1902806	regulation of cell cycle G1/S phase transition	5/50	156/15723	0.000133272092803833	0.00252455421511261	0.00135877411911277	EGFR/TP53/MDM2/CDK2/MEPCE	5
GO:0034976	response to endoplasmic reticulum stress	6/50	251/15723	0.000137569743875303	0.00258748199118654	0.00139264331985749	TRIM25/JUN/LRRK2/CFTR/TP53/COPS5	6
GO:2000177	regulation of neural precursor cell proliferation	4/50	84/15723	0.000144773938656285	0.00264233224692483	0.00142216501025247	LRRK2/TP53/DISC1/CTNNB1	4
GO:0051100	negative regulation of binding	5/50	159/15723	0.000145724799652016	0.00264233224692483	0.00142216501025247	JUN/LRRK2/SUMO1/DISC1/MEPCE	5
GO:0040031	snRNA modification	2/50	6/15723	0.000147460472301989	0.00264233224692483	0.00142216501025247	LARP7/MEPCE	2
GO:0051599	response to hydrostatic pressure	2/50	6/15723	0.000147460472301989	0.00264233224692483	0.00142216501025247	NTRK1/MYC	2
GO:0071680	response to indole-3-methanol	2/50	6/15723	0.000147460472301989	0.00264233224692483	0.00142216501025247	BRCA1/CTNNB1	2
GO:1902949	positive regulation of tau-protein kinase activity	2/50	6/15723	0.000147460472301989	0.00264233224692483	0.00142216501025247	HSP90AA1/HSP90AB1	2
GO:1905323	telomerase holoenzyme complex assembly	2/50	6/15723	0.000147460472301989	0.00264233224692483	0.00142216501025247	HSP90AA1/HSP90AB1	2
GO:0044774	mitotic DNA integrity checkpoint signaling	4/50	85/15723	0.000151568953401229	0.00267973909613373	0.00144229825131275	TP53/BRCA1/MDM2/CDK2	4
GO:0097306	cellular response to alcohol	4/50	85/15723	0.000151568953401229	0.00267973909613373	0.00144229825131275	CFTR/BRCA1/MYC/CTNNB1	4
GO:0051962	positive regulation of nervous system development	6/50	257/15723	0.000156470186890323	0.0027480724214115	0.00147907684505596	NTRK1/MYC/FN1/DISC1/CTNNB1/SNW1	6
GO:0031497	chromatin assembly	5/50	165/15723	0.000173289577489239	0.0030234471019833	0.00162728993819534	TP53/MCM2/H3C1/CDK2/NPM1	5
GO:0018205	peptidyl-lysine modification	7/50	378/15723	0.000179963130982603	0.00311936093703178	0.00167891300730932	SUMO2/SUMO1/BRCA1/LMNA/MDM2/CTNNB1/SNW1	7
GO:0072331	signal transduction by p53 class mediator	5/50	167/15723	0.000183310456935549	0.0031541747299511	0.00169765060483198	TP53/MYC/MDM2/HEXIM1/SNW1	5
GO:0071276	cellular response to cadmium ion	3/50	35/15723	0.000184350333009962	0.0031541747299511	0.00169765060483198	JUN/EGFR/SUMO1	3
GO:0051650	establishment of vesicle localization	5/50	168/15723	0.000188484011093093	0.00317091797346108	0.00170666221005526	LRRK2/CUL3/HTT/COPS5/CTNNB1	5
GO:1990138	neuron projection extension	5/50	168/15723	0.000188484011093093	0.00317091797346108	0.00170666221005526	HSP90AA1/FN1/DISC1/HSP90AB1/CTNNB1	5
GO:0043254	regulation of protein-containing complex assembly	7/50	381/15723	0.000188915927528978	0.00317091797346108	0.00170666221005526	ESR1/RNF4/SUMO1/TP53/GRB2/HSPA8/HSP90AA1	7
GO:0000075	cell cycle checkpoint signaling	5/50	169/15723	0.000193768417564711	0.00321171152113509	0.00172861825143255	TP53/BRCA1/MDM2/CDK2/CDC5L	5
GO:0051099	positive regulation of binding	5/50	169/15723	0.000193768417564711	0.00321171152113509	0.00172861825143255	APP/LRRK2/MYC/HSP90AB1/CTNNB1	5
GO:0032436	positive regulation of proteasomal ubiquitin-dependent protein catabolic process	4/50	91/15723	0.000197284738622009	0.0032496840175501	0.00174905593704769	SUMO2/LRRK2/SUMO1/MDM2	4
GO:0000055	ribosomal large subunit export from nucleus	2/50	7/15723	0.00020602479320001	0.0033520107458063	0.00180413057526131	XPO1/NPM1	2
GO:0061762	CAMKK-AMPK signaling cascade	2/50	7/15723	0.00020602479320001	0.0033520107458063	0.00180413057526131	LRRK2/HTT	2
GO:0009410	response to xenobiotic stimulus	7/50	391/15723	0.000221403771013828	0.00355858470885617	0.00191531351322099	NTRK1/JUN/EFTUD2/TP53/MYC/HSP90AB1/CTNNB1	7
GO:0010948	negative regulation of cell cycle process	6/50	274/15723	0.000221405157225214	0.00355858470885617	0.00191531351322099	TP53/BRCA1/MDM2/CDK2/NPM1/CDC5L	6
GO:0051702	biological process involved in interaction with symbiont	4/50	95/15723	0.000232811659373288	0.00371937663046964	0.00200185548579695	JUN/HSPA8/FN1/SNW1	4
GO:0051569	regulation of histone H3-K4 methylation	3/50	39/15723	0.000255121091012104	0.00402726865097679	0.00216757017175698	BRCA1/CTNNB1/SNW1	3
GO:0071392	cellular response to estradiol stimulus	3/50	39/15723	0.000255121091012104	0.00402726865097679	0.00216757017175698	ESR2/ESR1/EGFR	3
GO:0050808	synapse organization	7/50	402/15723	0.000262218051444218	0.00403207107246613	0.00217015494731447	APP/NTRK1/LRRK2/HSPA8/YWHAZ/DISC1/CTNNB1	7
GO:0000377	RNA splicing, via transesterification reactions with bulged adenosine as nucleophile	6/50	283/15723	0.000263497266994166	0.00403207107246613	0.00217015494731447	HNRNPL/EFTUD2/HSPA8/LARP7/SNW1/CDC5L	6
GO:0000398	mRNA splicing, via spliceosome	6/50	283/15723	0.000263497266994166	0.00403207107246613	0.00217015494731447	HNRNPL/EFTUD2/HSPA8/LARP7/SNW1/CDC5L	6
GO:0021700	developmental maturation	6/50	284/15723	0.000268538158110884	0.00403207107246613	0.00217015494731447	APP/LRRK2/CFTR/YWHAZ/DISC1/CTNNB1	6
GO:0070372	regulation of ERK1 and ERK2 cascade	6/50	284/15723	0.000268538158110884	0.00403207107246613	0.00217015494731447	APP/NTRK1/JUN/EGFR/YWHAZ/FN1	6
GO:0019080	viral gene expression	4/50	99/15723	0.000272730146879372	0.00403207107246613	0.00217015494731447	JUN/LARP7/HEXIM1/SNW1	4
GO:0042116	macrophage activation	4/50	99/15723	0.000272730146879372	0.00403207107246613	0.00217015494731447	APP/JUN/LRRK2/TNIP2	4
GO:0007369	gastrulation	5/50	182/15723	0.000273293405948538	0.00403207107246613	0.00217015494731447	CUL3/TP53/FN1/CTNNB1/RNF2	5
GO:0000056	ribosomal small subunit export from nucleus	2/50	8/15723	0.000274141155069137	0.00403207107246613	0.00217015494731447	XPO1/NPM1	2
GO:0036353	histone H2A-K119 monoubiquitination	2/50	8/15723	0.000274141155069137	0.00403207107246613	0.00217015494731447	BMI1/RNF2	2
GO:0045898	regulation of RNA polymerase II transcription preinitiation complex assembly	2/50	8/15723	0.000274141155069137	0.00403207107246613	0.00217015494731447	ESR1/TP53	2
GO:0099004	calmodulin dependent kinase signaling pathway	2/50	8/15723	0.000274141155069137	0.00403207107246613	0.00217015494731447	LRRK2/HTT	2
GO:0034243	regulation of transcription elongation from RNA polymerase II promoter	3/50	40/15723	0.000275190371084604	0.00403207107246613	0.00217015494731447	LARP7/HEXIM1/CTNNB1	3
GO:0000375	RNA splicing, via transesterification reactions	6/50	287/15723	0.000284118364704688	0.00414001045712545	0.00222825044846476	HNRNPL/EFTUD2/HSPA8/LARP7/SNW1/CDC5L	6
GO:0051648	vesicle localization	5/50	184/15723	0.000287446444600845	0.00416561732831388	0.00224203266539399	LRRK2/CUL3/HTT/COPS5/CTNNB1	5
GO:1901796	regulation of signal transduction by p53 class mediator	4/50	101/15723	0.000294432045740041	0.00422398894602663	0.00227344963515603	TP53/MYC/MDM2/HEXIM1	4
GO:0050821	protein stabilization	5/50	185/15723	0.00029472851376606	0.00422398894602663	0.00227344963515603	SUMO1/TP53/HSP90AA1/TNIP2/HSP90AB1	5
GO:0010463	mesenchymal cell proliferation	3/50	41/15723	0.000296252618386483	0.00422398894602663	0.00227344963515603	MYC/LMNA/CTNNB1	3
GO:0071248	cellular response to metal ion	5/50	186/15723	0.00030214995677681	0.00428503575065295	0.00230630645307827	APP/JUN/LRRK2/EGFR/SUMO1	5
GO:0048024	regulation of mRNA splicing, via spliceosome	4/50	102/15723	0.000305735601594785	0.00431282348632644	0.0023212624622762	HNRNPL/HSPA8/LARP7/SNW1	4
GO:0031334	positive regulation of protein-containing complex assembly	5/50	188/15723	0.00031741804419664	0.00439691404713556	0.0023665219686893	ESR1/SUMO1/TP53/GRB2/HSP90AA1	5
GO:0051960	regulation of nervous system development	7/50	415/15723	0.00031807367821946	0.00439691404713556	0.0023665219686893	NTRK1/TP53/MYC/FN1/DISC1/CTNNB1/SNW1	7
GO:0007099	centriole replication	3/50	42/15723	0.000318328618797145	0.00439691404713556	0.0023665219686893	BRCA1/CDK2/NPM1	3
GO:1900087	positive regulation of G1/S transition of mitotic cell cycle	3/50	42/15723	0.000318328618797145	0.00439691404713556	0.0023665219686893	EGFR/MDM2/MEPCE	3
GO:0009416	response to light stimulus	6/50	295/15723	0.000329165622087575	0.00452304264132771	0.00243440732779248	APP/EGFR/TP53/MYC/PCLAF/NPM1	6
GO:0033138	positive regulation of peptidyl-serine phosphorylation	4/50	105/15723	0.000341515286293548	0.00466854917139427	0.00251272234516577	APP/EGFR/HSP90AA1/HSP90AB1	4
GO:0085020	protein K6-linked ubiquitination	2/50	9/15723	0.000351750648557878	0.00478380882038715	0.00257475778377589	RNF4/BRCA1	2
GO:0048608	reproductive structure development	7/50	423/15723	0.000356959579110347	0.00482988165204408	0.00259955525925687	ESR1/NTRK1/EGFR/MYC/GRB2/HSP90AB1/CTNNB1	7
GO:0001774	microglial cell activation	3/50	44/15723	0.00036560394974818	0.00489687714511199	0.0026356138004175	APP/JUN/LRRK2	3
GO:0021795	cerebral cortex cell migration	3/50	44/15723	0.00036560394974818	0.00489687714511199	0.0026356138004175	EGFR/DISC1/CTNNB1	3
GO:0061458	reproductive system development	7/50	426/15723	0.000372491584668153	0.00496405870623087	0.00267177248775465	ESR1/NTRK1/EGFR/MYC/GRB2/HSP90AB1/CTNNB1	7
GO:0001763	morphogenesis of a branching structure	5/50	195/15723	0.000375509556352696	0.00497925671723675	0.00267995241270661	ESR1/LRRK2/MYC/GRB2/CTNNB1	5
GO:1902895	positive regulation of miRNA transcription	3/50	45/15723	0.000390843783273117	0.00515680454348411	0.00277551280501884	JUN/TP53/MYC	3
GO:0018105	peptidyl-serine phosphorylation	6/50	306/15723	0.000400069316132555	0.00525239518011651	0.00282696192118679	APP/LRRK2/EGFR/HSP90AA1/HSP90AB1/CDK2	6
GO:1902115	regulation of organelle assembly	5/50	199/15723	0.000412128902776276	0.00534472009540728	0.00287665334975481	LRRK2/RNF4/BRCA1/HTT/NPM1	5
GO:0031648	protein destabilization	3/50	46/15723	0.000417178378487672	0.00534472009540728	0.00287665334975481	CUL3/HTT/MDM2	3
GO:0046677	response to antibiotic	3/50	46/15723	0.000417178378487672	0.00534472009540728	0.00287665334975481	TP53/HSP90AA1/MDM2	3
GO:0098534	centriole assembly	3/50	46/15723	0.000417178378487672	0.00534472009540728	0.00287665334975481	BRCA1/CDK2/NPM1	3
GO:2000144	positive regulation of DNA-templated transcription, initiation	3/50	46/15723	0.000417178378487672	0.00534472009540728	0.00287665334975481	ESR1/JUN/TP53	3
GO:0051574	positive regulation of histone H3-K9 methylation	2/50	10/15723	0.000438794629442373	0.00551005619065864	0.00296564110285509	BRCA1/LMNA	2
GO:0062197	cellular response to chemical stress	6/50	312/15723	0.000443493617627949	0.00551005619065864	0.00296564110285509	JUN/LRRK2/EGFR/TP53/MYC/CTNNB1	6
GO:0071214	cellular response to abiotic stimulus	6/50	312/15723	0.000443493617627949	0.00551005619065864	0.00296564110285509	TP53/BRCA1/MYC/GRB2/MDM2/NPM1	6
GO:0104004	cellular response to environmental stimulus	6/50	312/15723	0.000443493617627949	0.00551005619065864	0.00296564110285509	TP53/BRCA1/MYC/GRB2/MDM2/NPM1	6
GO:0002269	leukocyte activation involved in inflammatory response	3/50	47/15723	0.000444627460332183	0.00551005619065864	0.00296564110285509	APP/JUN/LRRK2	3
GO:0010824	regulation of centrosome duplication	3/50	47/15723	0.000444627460332183	0.00551005619065864	0.00296564110285509	XPO1/BRCA1/NPM1	3
GO:0048483	autonomic nervous system development	3/50	47/15723	0.000444627460332183	0.00551005619065864	0.00296564110285509	NTRK1/FN1/CTNNB1	3
GO:1901215	negative regulation of neuron death	5/50	204/15723	0.000461629452004107	0.0056941456126274	0.00306472233496974	NTRK1/JUN/LRRK2/HSP90AB1/CTNNB1	5
GO:1901800	positive regulation of proteasomal protein catabolic process	4/50	115/15723	0.000482527636478584	0.0059243670923204	0.00318863291941988	SUMO2/LRRK2/SUMO1/MDM2	4
GO:0006352	DNA-templated transcription, initiation	4/50	117/15723	0.000515044559815261	0.00629446162502337	0.00338782645214404	ESR1/JUN/TP53/MYC	4
GO:0031398	positive regulation of protein ubiquitination	4/50	118/15723	0.000531875094556105	0.0063649750271227	0.00342577841421703	LRRK2/CUL3/BMI1/BRCA1	4
GO:0061900	glial cell activation	3/50	50/15723	0.00053385575835623	0.0063649750271227	0.00342577841421703	APP/JUN/LRRK2	3
GO:1902947	regulation of tau-protein kinase activity	2/50	11/15723	0.000535214717589881	0.0063649750271227	0.00342577841421703	HSP90AA1/HSP90AB1	2
GO:1903799	negative regulation of production of miRNAs involved in gene silencing by miRNA	2/50	11/15723	0.000535214717589881	0.0063649750271227	0.00342577841421703	ESR1/TP53	2
GO:1904869	regulation of protein localization to Cajal body	2/50	11/15723	0.000535214717589881	0.0063649750271227	0.00342577841421703	LARP7/MEPCE	2
GO:1904871	positive regulation of protein localization to Cajal body	2/50	11/15723	0.000535214717589881	0.0063649750271227	0.00342577841421703	LARP7/MEPCE	2
GO:0048675	axon extension	4/50	119/15723	0.000549093779884871	0.00645408451251436	0.00347373922321563	HSP90AA1/FN1/DISC1/HSP90AB1	4
GO:0051101	regulation of DNA binding	4/50	119/15723	0.000549093779884871	0.00645408451251436	0.00347373922321563	JUN/SUMO1/MYC/CTNNB1	4
GO:0045930	negative regulation of mitotic cell cycle	5/50	212/15723	0.000550008710342475	0.00645408451251436	0.00347373922321563	TP53/BRCA1/MDM2/CDK2/CTNNB1	5
GO:0050769	positive regulation of neurogenesis	5/50	213/15723	0.000561891554540011	0.00655421405645035	0.00352763128544362	MYC/FN1/DISC1/CTNNB1/SNW1	5
GO:0035196	production of miRNAs involved in gene silencing by miRNA	3/50	51/15723	0.000565955889489868	0.00655421405645035	0.00352763128544362	ESR1/EGFR/TP53	3
GO:0060688	regulation of morphogenesis of a branching structure	3/50	51/15723	0.000565955889489868	0.00655421405645035	0.00352763128544362	ESR1/LRRK2/CTNNB1	3
GO:0018209	peptidyl-serine modification	6/50	328/15723	0.000577480923109256	0.00665860612211194	0.00358381753654989	APP/LRRK2/EGFR/HSP90AA1/HSP90AB1/CDK2	6
GO:0006397	mRNA processing	7/50	459/15723	0.000582024321603745	0.00668194156230793	0.00359637721619812	APP/HNRNPL/EFTUD2/HSPA8/LARP7/SNW1/CDC5L	7
GO:0046605	regulation of centrosome cycle	3/50	52/15723	0.000599266033145415	0.00685023068923121	0.00368695436000537	XPO1/BRCA1/NPM1	3
GO:0061564	axon development	7/50	465/15723	0.000628635429174767	0.00699508977282181	0.00376492090654377	APP/NTRK1/JUN/HSP90AA1/FN1/DISC1/HSP90AB1	7
GO:0030520	intracellular estrogen receptor signaling pathway	3/50	53/15723	0.000633804683636976	0.00699508977282181	0.00376492090654377	ESR2/ESR1/BRCA1	3
GO:0010639	negative regulation of organelle organization	6/50	334/15723	0.000635146214525565	0.00699508977282181	0.00376492090654377	LRRK2/TP53/BRCA1/LMNA/MCM2/NPM1	6
GO:0010826	negative regulation of centrosome duplication	2/50	12/15723	0.00064095279592598	0.00699508977282181	0.00376492090654377	BRCA1/NPM1	2
GO:0046606	negative regulation of centrosome cycle	2/50	12/15723	0.00064095279592598	0.00699508977282181	0.00376492090654377	BRCA1/NPM1	2
GO:0051095	regulation of helicase activity	2/50	12/15723	0.00064095279592598	0.00699508977282181	0.00376492090654377	TP53/MCM2	2
GO:0071287	cellular response to manganese ion	2/50	12/15723	0.00064095279592598	0.00699508977282181	0.00376492090654377	APP/LRRK2	2
GO:0071635	negative regulation of transforming growth factor beta production	2/50	12/15723	0.00064095279592598	0.00699508977282181	0.00376492090654377	FN1/HSP90AB1	2
GO:1903405	protein localization to nuclear body	2/50	12/15723	0.00064095279592598	0.00699508977282181	0.00376492090654377	LARP7/MEPCE	2
GO:1903800	positive regulation of production of miRNAs involved in gene silencing by miRNA	2/50	12/15723	0.00064095279592598	0.00699508977282181	0.00376492090654377	EGFR/TP53	2
GO:1904867	protein localization to Cajal body	2/50	12/15723	0.00064095279592598	0.00699508977282181	0.00376492090654377	LARP7/MEPCE	2
GO:0043470	regulation of carbohydrate catabolic process	3/50	54/15723	0.000669590134594058	0.0072185082802579	0.0038851699722274	APP/TP53/MYC	3
GO:0070918	primary sncRNA processing	3/50	54/15723	0.000669590134594058	0.0072185082802579	0.0038851699722274	ESR1/EGFR/TP53	3
GO:1902808	positive regulation of cell cycle G1/S phase transition	3/50	54/15723	0.000669590134594058	0.0072185082802579	0.0038851699722274	EGFR/MDM2/MEPCE	3
GO:0002274	myeloid leukocyte activation	5/50	222/15723	0.00067773309538301	0.00727671323463864	0.00391649723988648	APP/JUN/LRRK2/TNIP2/FN1	5
GO:0034968	histone lysine methylation	4/50	126/15723	0.000680921137730065	0.00728146313411344	0.00391905374686744	BRCA1/LMNA/CTNNB1/SNW1	4
GO:0007265	Ras protein signal transduction	6/50	339/15723	0.000686541944248077	0.00731208528572651	0.00393553530501117	NTRK1/JUN/CUL3/TP53/GRB2/CDK2	6
GO:1901653	cellular response to peptide	6/50	340/15723	0.000697198060533443	0.00739587702613877	0.00398063397929831	APP/TP53/MYC/GRB2/MDM2/YWHAG	6
GO:0010332	response to gamma radiation	3/50	55/15723	0.000706640480207866	0.00746617750402893	0.00401847134058237	TP53/MYC/MDM2	3
GO:0060284	regulation of cell development	7/50	476/15723	0.000721796692664748	0.00757204401144275	0.00407545117072174	LRRK2/TP53/MYC/FN1/DISC1/CTNNB1/SNW1	7
GO:0040029	regulation of gene expression, epigenetic	4/50	128/15723	0.000722370714515466	0.00757204401144275	0.00407545117072174	BMI1/BRCA1/H3C1/CDK2	4
GO:0006338	chromatin remodeling	5/50	226/15723	0.000734606573887681	0.00765763577861361	0.00412151866150673	ESR1/MYC/MCM2/H3C1/NPM1	5
GO:0050767	regulation of neurogenesis	6/50	344/15723	0.00074111427028898	0.00765763577861361	0.00412151866150673	TP53/MYC/FN1/DISC1/CTNNB1/SNW1	6
GO:0007093	mitotic cell cycle checkpoint signaling	4/50	129/15723	0.000743751955940348	0.00765763577861361	0.00412151866150673	TP53/BRCA1/MDM2/CDK2	4
GO:0032784	regulation of DNA-templated transcription, elongation	3/50	56/15723	0.00074497361647146	0.00765763577861361	0.00412151866150673	LARP7/HEXIM1/CTNNB1	3
GO:2000142	regulation of DNA-templated transcription, initiation	3/50	56/15723	0.00074497361647146	0.00765763577861361	0.00412151866150673	ESR1/JUN/TP53	3
GO:0009415	response to water	2/50	13/15723	0.000755951009405478	0.00771070029593587	0.004150079225724	NTRK1/MYC	2
GO:0061029	eyelid development in camera-type eye	2/50	13/15723	0.000755951009405478	0.00771070029593587	0.004150079225724	JUN/EGFR	2
GO:0000723	telomere maintenance	4/50	130/15723	0.000765577701330803	0.00776995659799405	0.00418197235329044	MYC/HSP90AA1/HSP90AB1/CTNNB1	4
GO:0031400	negative regulation of protein modification process	7/50	481/15723	0.00076762014655899	0.00776995659799405	0.00418197235329044	JUN/LRRK2/BRCA1/YWHAG/HEXIM1/CTNNB1/NPM1	7
GO:0046686	response to cadmium ion	3/50	57/15723	0.000784607242413802	0.00788173638970228	0.00424213485132821	JUN/EGFR/SUMO1	3
GO:0098781	ncRNA transcription	3/50	57/15723	0.000784607242413802	0.00788173638970228	0.00424213485132821	TP53/LARP7/MEPCE	3
GO:1901988	negative regulation of cell cycle phase transition	5/50	231/15723	0.000810642523357572	0.00811254329035578	0.00436636052303026	TP53/BRCA1/MDM2/CDK2/CDC5L	5
GO:0006986	response to unfolded protein	4/50	134/15723	0.000857428920513607	0.00854850186918078	0.00460100362570816	HSPA8/HSP90AA1/COPS5/HSP90AB1	4
GO:0043068	positive regulation of programmed cell death	7/50	491/15723	0.000866198979157831	0.00855004570730216	0.00460183455549009	NTRK1/JUN/LRRK2/TP53/HTT/MYC/CTNNB1	7
GO:1902893	regulation of miRNA transcription	3/50	59/15723	0.00086784578199198	0.00855004570730216	0.00460183455549009	JUN/TP53/MYC	3
GO:0000054	ribosomal subunit export from nucleus	2/50	14/15723	0.000880151763986987	0.00855004570730216	0.00460183455549009	XPO1/NPM1	2
GO:0033750	ribosome localization	2/50	14/15723	0.000880151763986987	0.00855004570730216	0.00460183455549009	XPO1/NPM1	2
GO:0071236	cellular response to antibiotic	2/50	14/15723	0.000880151763986987	0.00855004570730216	0.00460183455549009	TP53/MDM2	2
GO:0090128	regulation of synapse maturation	2/50	14/15723	0.000880151763986987	0.00855004570730216	0.00460183455549009	YWHAZ/DISC1	2
GO:1990173	protein localization to nucleoplasm	2/50	14/15723	0.000880151763986987	0.00855004570730216	0.00460183455549009	LARP7/MEPCE	2
GO:0006368	transcription elongation from RNA polymerase II promoter	3/50	60/15723	0.000911485119886875	0.00879003104705452	0.0047310002777669	LARP7/HEXIM1/CTNNB1	3
GO:0061614	miRNA transcription	3/50	60/15723	0.000911485119886875	0.00879003104705452	0.0047310002777669	JUN/TP53/MYC	3
GO:0000209	protein polyubiquitination	5/50	238/15723	0.000926797887842221	0.00890531883535351	0.00479305086160965	RNF4/CUL3/BRCA1/MDM2/CTNNB1	5
GO:1903322	positive regulation of protein modification by small protein conjugation or removal	4/50	137/15723	0.000931237675824969	0.00891567623208598	0.00479862545475454	LRRK2/CUL3/BMI1/BRCA1	4
GO:0051403	stress-activated MAPK cascade	5/50	239/15723	0.00094435311504937	0.00896624701726518	0.00482584383401269	APP/LRRK2/EGFR/MYC/COPS5	5
GO:0034605	cellular response to heat	3/50	61/15723	0.000956493798404448	0.00896624701726518	0.00482584383401269	SUMO1/HSP90AA1/HSP90AB1	3
GO:1904589	regulation of protein import	3/50	61/15723	0.000956493798404448	0.00896624701726518	0.00482584383401269	SUMO1/HSPA8/HSP90AB1	3
GO:0018022	peptidyl-lysine methylation	4/50	138/15723	0.000956805394376337	0.00896624701726518	0.00482584383401269	BRCA1/LMNA/CTNNB1/SNW1	4
GO:0033135	regulation of peptidyl-serine phosphorylation	4/50	138/15723	0.000956805394376337	0.00896624701726518	0.00482584383401269	APP/EGFR/HSP90AA1/HSP90AB1	4
GO:0050684	regulation of mRNA processing	4/50	138/15723	0.000956805394376337	0.00896624701726518	0.00482584383401269	HNRNPL/HSPA8/LARP7/SNW1	4
GO:2001020	regulation of response to DNA damage stimulus	5/50	242/15723	0.00099850910757323	0.00932410617353594	0.00501845200099815	EGFR/TP53/BRCA1/MYC/MDM2	5
GO:0061351	neural precursor cell proliferation	4/50	140/15723	0.001009419101247	0.00936514274676285	0.00504053884441154	LRRK2/TP53/DISC1/CTNNB1	4
GO:0032897	negative regulation of viral transcription	2/50	15/15723	0.00101349772561121	0.00936514274676285	0.00504053884441154	LARP7/HEXIM1	2
GO:0071391	cellular response to estrogen stimulus	2/50	15/15723	0.00101349772561121	0.00936514274676285	0.00504053884441154	ESR1/MYC	2
GO:0051851	modulation by host of symbiont process	3/50	63/15723	0.00105068591765136	0.00964955361373149	0.00519361542439466	JUN/HSPA8/SNW1	3
GO:0030900	forebrain development	6/50	368/15723	0.0010515539194451	0.00964955361373149	0.00519361542439466	APP/LRRK2/EGFR/MYC/DISC1/CTNNB1	6
GO:0031098	stress-activated protein kinase signaling cascade	5/50	246/15723	0.00107427660776176	0.00982407435787648	0.00528754657032647	APP/LRRK2/EGFR/MYC/COPS5	5
GO:0042795	snRNA transcription by RNA polymerase II	2/50	16/15723	0.00115593181918287	0.0104983944673732	0.00565048142325874	LARP7/MEPCE	2
GO:0061684	chaperone-mediated autophagy	2/50	16/15723	0.00115593181918287	0.0104983944673732	0.00565048142325874	HSPA8/HSP90AA1	2
GO:0010821	regulation of mitochondrion organization	4/50	146/15723	0.00117945938084204	0.0106755163071437	0.00574581253968675	LRRK2/TP53/HTT/LMNA	4
GO:0051966	regulation of synaptic transmission, glutamatergic	3/50	66/15723	0.00120265632406227	0.0108116765132649	0.00581909714693465	NTRK1/LRRK2/DISC1	3
GO:0150076	neuroinflammatory response	3/50	66/15723	0.00120265632406227	0.0108116765132649	0.00581909714693465	APP/JUN/LRRK2	3
GO:0001701	in utero embryonic development	6/50	378/15723	0.00120708333110538	0.010814814169228	0.00582078590675284	EGFR/CUL3/TP53/MYC/GRB2/CTNNB1	6
GO:0031145	anaphase-promoting complex-dependent catabolic process	2/50	17/15723	0.00130739722755628	0.0115531857102726	0.00621819473808431	CUL3/CDK2	2
GO:0034244	negative regulation of transcription elongation from RNA polymerase II promoter	2/50	17/15723	0.00130739722755628	0.0115531857102726	0.00621819473808431	LARP7/HEXIM1	2
GO:0035518	histone H2A monoubiquitination	2/50	17/15723	0.00130739722755628	0.0115531857102726	0.00621819473808431	BMI1/RNF2	2
GO:0043923	positive regulation by host of viral transcription	2/50	17/15723	0.00130739722755628	0.0115531857102726	0.00621819473808431	JUN/SNW1	2
GO:0007004	telomere maintenance via telomerase	3/50	68/15723	0.0013112778653062	0.0115531857102726	0.00621819473808431	HSP90AA1/HSP90AB1/CTNNB1	3
GO:0043484	regulation of RNA splicing	4/50	151/15723	0.00133575501000006	0.0116911626617827	0.00629245716018786	HNRNPL/HSPA8/LARP7/SNW1	4
GO:0051092	positive regulation of NF-kappaB transcription factor activity	4/50	151/15723	0.00133575501000006	0.0116911626617827	0.00629245716018786	APP/TRIM25/NTRK1/NPM1	4
GO:0006278	RNA-templated DNA biosynthetic process	3/50	69/15723	0.00136782785487175	0.0118933753151471	0.00640129273927901	HSP90AA1/HSP90AB1/CTNNB1	3
GO:2000134	negative regulation of G1/S transition of mitotic cell cycle	3/50	69/15723	0.00136782785487175	0.0118933753151471	0.00640129273927901	TP53/MDM2/CDK2	3
GO:0043462	regulation of ATP-dependent activity	3/50	70/15723	0.0014258910483079	0.0123577224186685	0.00665121520985729	SUMO1/TP53/MCM2	3
GO:0006977	DNA damage response, signal transduction by p53 class mediator resulting in cell cycle arrest	2/50	18/15723	0.0014678373905246	0.0125692747158418	0.00676507760366814	TP53/MDM2	2
GO:0008340	determination of adult lifespan	2/50	18/15723	0.0014678373905246	0.0125692747158418	0.00676507760366814	LRRK2/TP53	2
GO:0032785	negative regulation of DNA-templated transcription, elongation	2/50	18/15723	0.0014678373905246	0.0125692747158418	0.00676507760366814	LARP7/HEXIM1	2
GO:0034599	cellular response to oxidative stress	5/50	264/15723	0.00146925911082616	0.0125692747158418	0.00676507760366814	JUN/LRRK2/EGFR/TP53/CTNNB1	5
GO:0051568	histone H3-K4 methylation	3/50	71/15723	0.00148548251336583	0.0126672013679942	0.00681778401802019	BRCA1/CTNNB1/SNW1	3
GO:0016571	histone methylation	4/50	156/15723	0.00150600877926384	0.0128010746237426	0.00688983773509368	BRCA1/LMNA/CTNNB1/SNW1	4
GO:0008380	RNA splicing	6/50	397/15723	0.00155076241954506	0.0131393672096917	0.00707191471633799	HNRNPL/EFTUD2/HSPA8/LARP7/SNW1/CDC5L	6
GO:0051896	regulation of protein kinase B signaling	4/50	158/15723	0.00157816302052056	0.0133289437274539	0.00717394923173273	NTRK1/EGFR/HSP90AA1/HSP90AB1	4
GO:0009301	snRNA transcription	2/50	19/15723	0.00163719600381264	0.0137400120319972	0.00739519580669532	LARP7/MEPCE	2
GO:0046782	regulation of viral transcription	2/50	19/15723	0.00163719600381264	0.0137400120319972	0.00739519580669532	LARP7/HEXIM1	2
GO:0001666	response to hypoxia	5/50	271/15723	0.0016486629334069	0.0137814996109137	0.00741752539191833	EGLN3/TP53/MYC/LMNA/MDM2	5
GO:0045936	negative regulation of phosphate metabolic process	6/50	402/15723	0.00165253275877472	0.0137814996109137	0.00741752539191833	JUN/LRRK2/TP53/YWHAG/HEXIM1/NPM1	6
GO:0010563	negative regulation of phosphorus metabolic process	6/50	403/15723	0.0016734847269913	0.0139124811786236	0.0074880227348629	JUN/LRRK2/TP53/YWHAG/HEXIM1/NPM1	6
GO:1901991	negative regulation of mitotic cell cycle phase transition	4/50	163/15723	0.00176904032886889	0.0146152490721505	0.00786626885045489	TP53/BRCA1/MDM2/CDK2	4
GO:2001242	regulation of intrinsic apoptotic signaling pathway	4/50	163/15723	0.00176904032886889	0.0146152490721505	0.00786626885045489	LRRK2/TP53/MYC/MDM2	4
GO:1902807	negative regulation of cell cycle G1/S phase transition	3/50	76/15723	0.00180687880617837	0.0148595244812673	0.00799774358839346	TP53/MDM2/CDK2	3
GO:0010042	response to manganese ion	2/50	20/15723	0.00181541701807338	0.0148595244812673	0.00799774358839346	APP/LRRK2	2
GO:0045821	positive regulation of glycolytic process	2/50	20/15723	0.00181541701807338	0.0148595244812673	0.00799774358839346	APP/MYC	2
GO:0006979	response to oxidative stress	6/50	410/15723	0.00182588461804972	0.0148992184832857	0.00801910782858437	APP/JUN/LRRK2/EGFR/TP53/CTNNB1	6
GO:0006260	DNA replication	5/50	278/15723	0.001843723065784	0.0149986305842306	0.00807261374621602	EGFR/TP53/MCM2/PCLAF/CDK2	5
GO:0021954	central nervous system neuron development	3/50	77/15723	0.00187594636980076	0.0152140971642557	0.00818858289859916	HSP90AA1/DISC1/HSP90AB1	3
GO:0006354	DNA-templated transcription, elongation	3/50	78/15723	0.00194664272603308	0.0157393186263406	0.00847126937259579	LARP7/HEXIM1/CTNNB1	3
GO:0032780	negative regulation of ATP-dependent activity	2/50	21/15723	0.00200244463788803	0.0160437558298461	0.0086351245952494	TP53/MCM2	2
GO:0038083	peptidyl-tyrosine autophosphorylation	2/50	21/15723	0.00200244463788803	0.0160437558298461	0.0086351245952494	NTRK1/EGFR	2
GO:0140747	regulation of ncRNA transcription	2/50	21/15723	0.00200244463788803	0.0160437558298461	0.0086351245952494	LARP7/MEPCE	2
GO:0010833	telomere maintenance via telomere lengthening	3/50	79/15723	0.00201898154088221	0.0161189741925661	0.00867560887716109	HSP90AA1/HSP90AB1/CTNNB1	3
GO:0036293	response to decreased oxygen levels	5/50	284/15723	0.00202398884092176	0.0161189741925661	0.00867560887716109	EGLN3/TP53/MYC/LMNA/MDM2	5
GO:0007409	axonogenesis	6/50	421/15723	0.00208646673831624	0.016566795778487	0.00891663692769245	APP/NTRK1/HSP90AA1/FN1/DISC1/HSP90AB1	6
GO:0009266	response to temperature stimulus	4/50	171/15723	0.00210694866184347	0.0166794861230116	0.00897728950655065	NTRK1/SUMO1/HSP90AA1/HSP90AB1	4
GO:0010720	positive regulation of cell development	5/50	287/15723	0.00211881667779734	0.0167235173497576	0.00900098814252254	MYC/FN1/DISC1/CTNNB1/SNW1	5
GO:0007254	JNK cascade	4/50	173/15723	0.00219793080930862	0.0169961756463008	0.00914773921425096	APP/LRRK2/EGFR/COPS5	4
GO:0048469	cell maturation	4/50	173/15723	0.00219793080930862	0.0169961756463008	0.00914773921425096	APP/LRRK2/CFTR/CTNNB1	4
GO:0031065	positive regulation of histone deacetylation	2/50	22/15723	0.00219822332076967	0.0169961756463008	0.00914773921425096	LRRK2/TP53	2
GO:0042026	protein refolding	2/50	22/15723	0.00219822332076967	0.0169961756463008	0.00914773921425096	HSPA8/HSP90AA1	2
GO:0048026	positive regulation of mRNA splicing, via spliceosome	2/50	22/15723	0.00219822332076967	0.0169961756463008	0.00914773921425096	HSPA8/SNW1	2
GO:0048485	sympathetic nervous system development	2/50	22/15723	0.00219822332076967	0.0169961756463008	0.00914773921425096	NTRK1/CTNNB1	2
GO:0051131	chaperone-mediated protein complex assembly	2/50	22/15723	0.00219822332076967	0.0169961756463008	0.00914773921425096	HSP90AA1/HSP90AB1	2
GO:0048732	gland development	6/50	426/15723	0.00221384077143102	0.01706716780766	0.00918594885575416	ESR1/JUN/EGFR/CUL3/MYC/CTNNB1	6
GO:0016055	Wnt signaling pathway	6/50	427/15723	0.00224000779420963	0.0172188425224462	0.00926758373439592	APP/LRRK2/EGFR/CUL3/DISC1/CTNNB1	6
GO:0198738	cell-cell signaling by wnt	6/50	429/15723	0.0022930448058398	0.0175755919800207	0.00945959463559103	APP/LRRK2/EGFR/CUL3/DISC1/CTNNB1	6
GO:0032092	positive regulation of protein binding	3/50	83/15723	0.00232502877231652	0.0177183227131707	0.0095364156541476	APP/LRRK2/HSP90AB1	3
GO:1903578	regulation of ATP metabolic process	3/50	83/15723	0.00232502877231652	0.0177183227131707	0.0095364156541476	APP/TP53/MYC	3
GO:0002053	positive regulation of mesenchymal cell proliferation	2/50	23/15723	0.00240269777617051	0.0181253573265803	0.00975549120220799	MYC/CTNNB1	2
GO:0046599	regulation of centriole replication	2/50	23/15723	0.00240269777617051	0.0181253573265803	0.00975549120220799	BRCA1/NPM1	2
GO:0060571	morphogenesis of an epithelial fold	2/50	23/15723	0.00240269777617051	0.0181253573265803	0.00975549120220799	EGFR/CTNNB1	2
GO:1900182	positive regulation of protein localization to nucleus	3/50	84/15723	0.00240577895134097	0.0181253573265803	0.00975549120220799	LARP7/HSP90AB1/MEPCE	3
GO:0034644	cellular response to UV	3/50	85/15723	0.00248825004882657	0.0186935952676715	0.0100613301512116	TP53/MYC/NPM1	3
GO:0031667	response to nutrient levels	6/50	438/15723	0.00254357831272261	0.0189539234476355	0.0102014448658386	TRIM25/NTRK1/LRRK2/TP53/HSPA8/SNW1	6
GO:0010952	positive regulation of peptidase activity	4/50	181/15723	0.0025890884220143	0.0189539234476355	0.0102014448658386	APP/EGLN3/MYC/FN1	4
GO:0061138	morphogenesis of a branching epithelium	4/50	181/15723	0.0025890884220143	0.0189539234476355	0.0102014448658386	ESR1/MYC/GRB2/CTNNB1	4
GO:0006605	protein targeting	5/50	301/15723	0.00260490581578068	0.0189539234476355	0.0102014448658386	LRRK2/HSPA8/HSP90AA1/YWHAZ/YWHAG	5
GO:0002052	positive regulation of neuroblast proliferation	2/50	24/15723	0.00261581296449268	0.0189539234476355	0.0102014448658386	DISC1/CTNNB1	2
GO:0021801	cerebral cortex radial glia-guided migration	2/50	24/15723	0.00261581296449268	0.0189539234476355	0.0102014448658386	DISC1/CTNNB1	2
GO:0022030	telencephalon glial cell migration	2/50	24/15723	0.00261581296449268	0.0189539234476355	0.0102014448658386	DISC1/CTNNB1	2
GO:0035994	response to muscle stretch	2/50	24/15723	0.00261581296449268	0.0189539234476355	0.0102014448658386	JUN/CTNNB1	2
GO:0044030	regulation of DNA methylation	2/50	24/15723	0.00261581296449268	0.0189539234476355	0.0102014448658386	BRCA1/MYC	2
GO:0051570	regulation of histone H3-K9 methylation	2/50	24/15723	0.00261581296449268	0.0189539234476355	0.0102014448658386	BRCA1/LMNA	2
GO:0060333	interferon-gamma-mediated signaling pathway	2/50	24/15723	0.00261581296449268	0.0189539234476355	0.0102014448658386	TP53/HSP90AB1	2
GO:1901522	positive regulation of transcription from RNA polymerase II promoter involved in cellular response to chemical stimulus	2/50	24/15723	0.00261581296449268	0.0189539234476355	0.0102014448658386	JUN/TP53	2
GO:2000637	positive regulation of miRNA-mediated gene silencing	2/50	24/15723	0.00261581296449268	0.0189539234476355	0.0102014448658386	EGFR/TP53	2
GO:0007179	transforming growth factor beta receptor signaling pathway	4/50	182/15723	0.00264112875945399	0.01908521381491	0.0102721084119306	JUN/TP53/HSP90AB1/SNW1	4
GO:0006334	nucleosome assembly	3/50	87/15723	0.00265840482600304	0.0191059338714365	0.0102832604309232	MCM2/H3C1/NPM1	3
GO:0048525	negative regulation of viral process	3/50	87/15723	0.00265840482600304	0.0191059338714365	0.0102832604309232	TRIM25/LARP7/HEXIM1	3
GO:0001702	gastrulation with mouth forming second	2/50	25/15723	0.00283751409610263	0.0201744970049978	0.0108583860993796	CTNNB1/RNF2	2
GO:0060074	synapse maturation	2/50	25/15723	0.00283751409610263	0.0201744970049978	0.0108583860993796	YWHAZ/DISC1	2
GO:0060148	positive regulation of post-transcriptional gene silencing	2/50	25/15723	0.00283751409610263	0.0201744970049978	0.0108583860993796	EGFR/TP53	2
GO:1900370	positive regulation of post-transcriptional gene silencing by RNA	2/50	25/15723	0.00283751409610263	0.0201744970049978	0.0108583860993796	EGFR/TP53	2
GO:0043491	protein kinase B signaling	4/50	187/15723	0.00291216242386393	0.0205170630349761	0.0110427631481415	NTRK1/EGFR/HSP90AA1/HSP90AB1	4
GO:0050679	positive regulation of epithelial cell proliferation	4/50	187/15723	0.00291216242386393	0.0205170630349761	0.0110427631481415	JUN/EGFR/MYC/CTNNB1	4
GO:0001933	negative regulation of protein phosphorylation	5/50	309/15723	0.00291664131379563	0.0205170630349761	0.0110427631481415	JUN/LRRK2/YWHAG/HEXIM1/NPM1	5
GO:0070482	response to oxygen levels	5/50	309/15723	0.00291664131379563	0.0205170630349761	0.0110427631481415	EGLN3/TP53/MYC/LMNA/MDM2	5
GO:0035249	synaptic transmission, glutamatergic	3/50	90/15723	0.00292685105034888	0.0205344153056223	0.0110521025460125	NTRK1/LRRK2/DISC1	3
GO:0033522	histone H2A ubiquitination	2/50	26/15723	0.00306774663034902	0.0214661320941573	0.0115535743112159	BMI1/RNF2	2
GO:0030111	regulation of Wnt signaling pathway	5/50	313/15723	0.00308227453188728	0.0215110317330659	0.0115777403469228	APP/LRRK2/EGFR/DISC1/CTNNB1	5
GO:0060993	kidney morphogenesis	3/50	92/15723	0.00311476286545129	0.0216807115988893	0.0116690660189306	LRRK2/MYC/CTNNB1	3
GO:0009895	negative regulation of catabolic process	5/50	314/15723	0.00312472622848808	0.0216931255443727	0.0116757474947088	ELAVL1/LRRK2/EGFR/TP53/HSP90AB1	5
GO:0006479	protein methylation	4/50	191/15723	0.00314228168782087	0.0217013829065129	0.0116801918001236	BRCA1/LMNA/CTNNB1/SNW1	4
GO:0008213	protein alkylation	4/50	191/15723	0.00314228168782087	0.0217013829065129	0.0116801918001236	BRCA1/LMNA/CTNNB1/SNW1	4
GO:0032872	regulation of stress-activated MAPK cascade	4/50	192/15723	0.00320169821057988	0.022054295206384	0.011870137453305	APP/EGFR/MYC/COPS5	4
GO:2001237	negative regulation of extrinsic apoptotic signaling pathway	3/50	93/15723	0.00321143768549015	0.0220640744609323	0.0118754008768057	BRCA1/HTT/LMNA	3
GO:0043393	regulation of protein binding	4/50	193/15723	0.00326187907845508	0.0223527217469325	0.0120307575965867	APP/LRRK2/DISC1/HSP90AB1	4
GO:0009651	response to salt stress	2/50	27/15723	0.00330645627458413	0.0223927582460358	0.0120523061767185	TP53/HSP90AB1	2
GO:0043032	positive regulation of macrophage activation	2/50	27/15723	0.00330645627458413	0.0223927582460358	0.0120523061767185	LRRK2/TNIP2	2
GO:1901798	positive regulation of signal transduction by p53 class mediator	2/50	27/15723	0.00330645627458413	0.0223927582460358	0.0120523061767185	MYC/HEXIM1	2
GO:0010389	regulation of G2/M transition of mitotic cell cycle	3/50	94/15723	0.00330994013289821	0.0223927582460358	0.0120523061767185	APP/BRCA1/CDK2	3
GO:1904029	regulation of cyclin-dependent protein kinase activity	3/50	94/15723	0.00330994013289821	0.0223927582460358	0.0120523061767185	EGFR/HEXIM1/HSP90AB1	3
GO:0009612	response to mechanical stimulus	4/50	195/15723	0.00338455306920847	0.0227813064455352	0.0122614319044795	NTRK1/JUN/HTT/CTNNB1	4
GO:0070302	regulation of stress-activated protein kinase signaling cascade	4/50	195/15723	0.00338455306920847	0.0227813064455352	0.0122614319044795	APP/EGFR/MYC/COPS5	4
GO:1901652	response to peptide	6/50	465/15723	0.00342014976163887	0.0229626257414336	0.0123590221899595	APP/TP53/MYC/GRB2/MDM2/YWHAG	6
GO:0043410	positive regulation of MAPK cascade	6/50	467/15723	0.00349304981068197	0.0233928487321429	0.0125905782649781	APP/NTRK1/JUN/LRRK2/EGFR/CTNNB1	6
GO:0010390	histone monoubiquitination	2/50	28/15723	0.00355358898318887	0.0236193433168343	0.0127124829473793	BMI1/RNF2	2
GO:0051123	RNA polymerase II preinitiation complex assembly	2/50	28/15723	0.00355358898318887	0.0236193433168343	0.0127124829473793	ESR1/TP53	2
GO:0090312	positive regulation of protein deacetylation	2/50	28/15723	0.00355358898318887	0.0236193433168343	0.0127124829473793	LRRK2/TP53	2
GO:0009991	response to extracellular stimulus	6/50	470/15723	0.00360457360713734	0.0238983230153206	0.012862636345469	TRIM25/NTRK1/LRRK2/TP53/HSPA8/SNW1	6
GO:0071383	cellular response to steroid hormone stimulus	4/50	199/15723	0.00363928384647759	0.0240285288217253	0.0129327161555368	ESR2/ESR1/BRCA1/HSPA8	4
GO:0051223	regulation of protein transport	6/50	471/15723	0.00364233355442443	0.0240285288217253	0.0129327161555368	LRRK2/CFTR/XPO1/SUMO1/HSPA8/HSP90AB1	6
GO:0032414	positive regulation of ion transmembrane transporter activity	3/50	98/15723	0.00372244532432955	0.024496091811717	0.0131843694914219	CFTR/SUMO1/HTT	3
GO:0048147	negative regulation of fibroblast proliferation	2/50	29/15723	0.00380909095660119	0.0249424918935959	0.0134246324552338	TP53/MYC	2
GO:0071480	cellular response to gamma radiation	2/50	29/15723	0.00380909095660119	0.0249424918935959	0.0134246324552338	TP53/MDM2	2
GO:0010638	positive regulation of organelle organization	6/50	476/15723	0.00383558756185143	0.0249514932550027	0.0134294771984535	CUL3/TP53/HTT/GRB2/CDK2/CTNNB1	6
GO:0002573	myeloid leukocyte differentiation	4/50	202/15723	0.00383869127000042	0.0249514932550027	0.0134294771984535	APP/JUN/MYC/CTNNB1	4
GO:0070374	positive regulation of ERK1 and ERK2 cascade	4/50	202/15723	0.00383869127000042	0.0249514932550027	0.0134294771984535	APP/NTRK1/JUN/EGFR	4
GO:0048863	stem cell differentiation	4/50	205/15723	0.00404540481964512	0.0262065569563988	0.014104981834118	ESR1/TP53/FN1/CTNNB1	4
GO:0008630	intrinsic apoptotic signaling pathway in response to DNA damage	3/50	101/15723	0.0040515416109063	0.0262065569563988	0.014104981834118	TP53/BRCA1/SNW1	3
GO:0140058	neuron projection arborization	2/50	30/15723	0.00407290864034809	0.0262806659712972	0.0141448690390883	LRRK2/MOV10	2
GO:0009408	response to heat	3/50	103/15723	0.00428048198859572	0.0274862911228955	0.0147937646910559	SUMO1/HSP90AA1/HSP90AB1	3
GO:0014066	regulation of phosphatidylinositol 3-kinase signaling	3/50	103/15723	0.00428048198859572	0.0274862911228955	0.0147937646910559	NTRK1/EGFR/FN1	3
GO:0031669	cellular response to nutrient levels	4/50	209/15723	0.00433260481271287	0.0275667705652222	0.0148370806090503	LRRK2/TP53/HSPA8/SNW1	4
GO:0030511	positive regulation of transforming growth factor beta receptor signaling pathway	2/50	31/15723	0.00434498872408102	0.0275667705652222	0.0148370806090503	HSP90AB1/SNW1	2
GO:0050685	positive regulation of mRNA processing	2/50	31/15723	0.00434498872408102	0.0275667705652222	0.0148370806090503	HSPA8/SNW1	2
GO:1902751	positive regulation of cell cycle G2/M phase transition	2/50	31/15723	0.00434498872408102	0.0275667705652222	0.0148370806090503	APP/NPM1	2
GO:1903846	positive regulation of cellular response to transforming growth factor beta stimulus	2/50	31/15723	0.00434498872408102	0.0275667705652222	0.0148370806090503	HSP90AB1/SNW1	2
GO:0046822	regulation of nucleocytoplasmic transport	3/50	104/15723	0.00439784465203666	0.0278355227140841	0.0149817293007454	XPO1/SUMO1/HSP90AB1	3
GO:0007264	small GTPase mediated signal transduction	6/50	491/15723	0.00446139637664032	0.028170531406786	0.0151620388138453	NTRK1/JUN/CUL3/TP53/GRB2/CDK2	6
GO:0010038	response to metal ion	5/50	342/15723	0.00449361102470705	0.028306547357537	0.0152352457794793	APP/JUN/LRRK2/EGFR/SUMO1	5
GO:0071353	cellular response to interleukin-4	2/50	32/15723	0.00462527814061483	0.0289981977042802	0.0156075081713916	MCM2/HSP90AB1	2
GO:1990000	amyloid fibril formation	2/50	32/15723	0.00462527814061483	0.0289981977042802	0.0156075081713916	APP/MDM2	2
GO:0051897	positive regulation of protein kinase B signaling	3/50	106/15723	0.00463840284244064	0.0290118970239448	0.0156148814656145	EGFR/HSP90AA1/HSP90AB1	3
GO:0070201	regulation of establishment of protein localization	6/50	496/15723	0.00468594773146111	0.0292403138443173	0.0157378207402137	LRRK2/CFTR/XPO1/SUMO1/HSPA8/HSP90AB1	6
GO:0007163	establishment or maintenance of cell polarity	4/50	214/15723	0.00471063152249682	0.029325339900614	0.0157835837521762	HTT/HSP90AA1/LMNA/HSP90AB1	4
GO:0042326	negative regulation of phosphorylation	5/50	347/15723	0.00477693422734333	0.0296684533276687	0.0159682554228462	JUN/LRRK2/YWHAG/HEXIM1/NPM1	5
GO:0072593	reactive oxygen species metabolic process	4/50	215/15723	0.00478881911316128	0.0296727763740741	0.0159705821875226	LRRK2/TP53/BRCA1/GRB2	4
GO:0021799	cerebral cortex radially oriented cell migration	2/50	33/15723	0.00491372406497013	0.030095141386376	0.0161979089147915	DISC1/CTNNB1	2
GO:0033280	response to vitamin D	2/50	33/15723	0.00491372406497013	0.030095141386376	0.0161979089147915	TRIM25/SNW1	2
GO:0046685	response to arsenic-containing substance	2/50	33/15723	0.00491372406497013	0.030095141386376	0.0161979089147915	RNF4/MYC	2
GO:1904031	positive regulation of cyclin-dependent protein kinase activity	2/50	33/15723	0.00491372406497013	0.030095141386376	0.0161979089147915	EGFR/HSP90AB1	2
GO:2000036	regulation of stem cell population maintenance	2/50	33/15723	0.00491372406497013	0.030095141386376	0.0161979089147915	ELAVL1/MYC	2
GO:0032411	positive regulation of transporter activity	3/50	109/15723	0.00501396174350346	0.0306383100086894	0.0164902549701448	CFTR/SUMO1/HTT	3
GO:0007006	mitochondrial membrane organization	3/50	110/15723	0.00514311000831129	0.0312833205092696	0.0168374147061084	TP53/MYC/HSP90AA1	3
GO:0021987	cerebral cortex development	3/50	110/15723	0.00514311000831129	0.0312833205092696	0.0168374147061084	EGFR/DISC1/CTNNB1	3
GO:0006301	postreplication repair	2/50	34/15723	0.00521027391341912	0.0314752765794704	0.0169407299522751	BRCA1/PCLAF	2
GO:0030224	monocyte differentiation	2/50	34/15723	0.00521027391341912	0.0314752765794704	0.0169407299522751	JUN/MYC	2
GO:0070670	response to interleukin-4	2/50	34/15723	0.00521027391341912	0.0314752765794704	0.0169407299522751	MCM2/HSP90AB1	2
GO:0071900	regulation of protein serine/threonine kinase activity	5/50	355/15723	0.00525646296584435	0.0316821358759528	0.0170520664633611	LRRK2/EGFR/HTT/HEXIM1/HSP90AB1	5
GO:0033157	regulation of intracellular protein transport	4/50	221/15723	0.00527639573478351	0.0317301621057729	0.0170779153034167	LRRK2/XPO1/SUMO1/HSP90AB1	4
GO:0046777	protein autophosphorylation	4/50	222/15723	0.00536077486578168	0.0321646491946901	0.0173117664158132	NTRK1/JUN/LRRK2/EGFR	4
GO:0016242	negative regulation of macroautophagy	2/50	35/15723	0.00551487534253482	0.0327369200521576	0.0176197759747264	LRRK2/TP53	2
GO:0021955	central nervous system neuron axonogenesis	2/50	35/15723	0.00551487534253482	0.0327369200521576	0.0176197759747264	HSP90AA1/HSP90AB1	2
GO:1901021	positive regulation of calcium ion transmembrane transporter activity	2/50	35/15723	0.00551487534253482	0.0327369200521576	0.0176197759747264	SUMO1/HTT	2
GO:1903580	positive regulation of ATP metabolic process	2/50	35/15723	0.00551487534253482	0.0327369200521576	0.0176197759747264	APP/MYC	2
GO:0030518	intracellular steroid hormone receptor signaling pathway	3/50	113/15723	0.0055425630103389	0.0327369200521576	0.0176197759747264	ESR2/ESR1/BRCA1	3
GO:0035967	cellular response to topologically incorrect protein	3/50	113/15723	0.0055425630103389	0.0327369200521576	0.0176197759747264	CUL3/HSPA8/COPS5	3
GO:0071482	cellular response to light stimulus	3/50	113/15723	0.0055425630103389	0.0327369200521576	0.0176197759747264	TP53/MYC/NPM1	3
GO:0071346	cellular response to interferon-gamma	3/50	114/15723	0.00567974495336351	0.0334726302584889	0.0180157524134758	TP53/MYC/HSP90AB1	3
GO:0033120	positive regulation of RNA splicing	2/50	36/15723	0.00582747624824383	0.0334805682179858	0.0180200248089183	HSPA8/SNW1	2
GO:0043516	regulation of DNA damage response, signal transduction by p53 class mediator	2/50	36/15723	0.00582747624824383	0.0334805682179858	0.0180200248089183	TP53/MDM2	2
GO:1903146	regulation of autophagy of mitochondrion	2/50	36/15723	0.00582747624824383	0.0334805682179858	0.0180200248089183	TP53/HTT	2
GO:0097305	response to alcohol	4/50	228/15723	0.00588614367556826	0.0334805682179858	0.0180200248089183	CFTR/BRCA1/MYC/CTNNB1	4
GO:0017015	regulation of transforming growth factor beta receptor signaling pathway	3/50	116/15723	0.00596020460143762	0.0334805682179858	0.0180200248089183	TP53/HSP90AB1/SNW1	3
GO:0032412	regulation of ion transmembrane transporter activity	4/50	230/15723	0.00606864329266792	0.0334805682179858	0.0180200248089183	APP/CFTR/SUMO1/HTT	4
GO:0045429	positive regulation of nitric oxide biosynthetic process	2/50	37/15723	0.00614802476488234	0.0334805682179858	0.0180200248089183	HSP90AA1/HSP90AB1	2
GO:0098815	modulation of excitatory postsynaptic potential	2/50	37/15723	0.00614802476488234	0.0334805682179858	0.0180200248089183	APP/LRRK2	2
GO:0071560	cellular response to transforming growth factor beta stimulus	4/50	232/15723	0.00625488766068399	0.0334805682179858	0.0180200248089183	JUN/TP53/HSP90AB1/SNW1	4
GO:0000494	box C/D RNA 3'-end processing	1/50	2/15723	0.0063501982706059	0.0334805682179858	0.0180200248089183	LARP7	1
GO:0001831	trophectodermal cellular morphogenesis	1/50	2/15723	0.0063501982706059	0.0334805682179858	0.0180200248089183	CUL3	1
GO:0003340	negative regulation of mesenchymal to epithelial transition involved in metanephros morphogenesis	1/50	2/15723	0.0063501982706059	0.0334805682179858	0.0180200248089183	CTNNB1	1
GO:0006407	rRNA export from nucleus	1/50	2/15723	0.0063501982706059	0.0334805682179858	0.0180200248089183	NPM1	1
GO:0032298	positive regulation of DNA-templated DNA replication initiation	1/50	2/15723	0.0063501982706059	0.0334805682179858	0.0180200248089183	CDK2	1
GO:0033967	box C/D RNA metabolic process	1/50	2/15723	0.0063501982706059	0.0334805682179858	0.0180200248089183	LARP7	1
GO:0034963	box C/D RNA processing	1/50	2/15723	0.0063501982706059	0.0334805682179858	0.0180200248089183	LARP7	1
GO:0035026	leading edge cell differentiation	1/50	2/15723	0.0063501982706059	0.0334805682179858	0.0180200248089183	JUN	1
GO:0035279	miRNA-mediated gene silencing by mRNA destabilization	1/50	2/15723	0.0063501982706059	0.0334805682179858	0.0180200248089183	MOV10	1
GO:0044334	canonical Wnt signaling pathway involved in positive regulation of epithelial to mesenchymal transition	1/50	2/15723	0.0063501982706059	0.0334805682179858	0.0180200248089183	CTNNB1	1
GO:0044336	canonical Wnt signaling pathway involved in negative regulation of apoptotic process	1/50	2/15723	0.0063501982706059	0.0334805682179858	0.0180200248089183	CTNNB1	1
GO:0045976	negative regulation of mitotic cell cycle, embryonic	1/50	2/15723	0.0063501982706059	0.0334805682179858	0.0180200248089183	CTNNB1	1
GO:0051563	smooth endoplasmic reticulum calcium ion homeostasis	1/50	2/15723	0.0063501982706059	0.0334805682179858	0.0180200248089183	APP	1
GO:0061047	positive regulation of branching involved in lung morphogenesis	1/50	2/15723	0.0063501982706059	0.0334805682179858	0.0180200248089183	CTNNB1	1
GO:0061366	behavioral response to chemical pain	1/50	2/15723	0.0063501982706059	0.0334805682179858	0.0180200248089183	NTRK1	1
GO:0061368	behavioral response to formalin induced pain	1/50	2/15723	0.0063501982706059	0.0334805682179858	0.0180200248089183	NTRK1	1
GO:0071630	nuclear protein quality control by the ubiquitin-proteasome system	1/50	2/15723	0.0063501982706059	0.0334805682179858	0.0180200248089183	CUL3	1
GO:0071873	response to norepinephrine	1/50	2/15723	0.0063501982706059	0.0334805682179858	0.0180200248089183	APP	1
GO:0071874	cellular response to norepinephrine stimulus	1/50	2/15723	0.0063501982706059	0.0334805682179858	0.0180200248089183	APP	1
GO:0072053	renal inner medulla development	1/50	2/15723	0.0063501982706059	0.0334805682179858	0.0180200248089183	CTNNB1	1
GO:0072054	renal outer medulla development	1/50	2/15723	0.0063501982706059	0.0334805682179858	0.0180200248089183	CTNNB1	1
GO:0072185	metanephric cap development	1/50	2/15723	0.0063501982706059	0.0334805682179858	0.0180200248089183	MYC	1
GO:0072186	metanephric cap morphogenesis	1/50	2/15723	0.0063501982706059	0.0334805682179858	0.0180200248089183	MYC	1
GO:0090094	metanephric cap mesenchymal cell proliferation involved in metanephros development	1/50	2/15723	0.0063501982706059	0.0334805682179858	0.0180200248089183	MYC	1
GO:1901963	regulation of cell proliferation involved in outflow tract morphogenesis	1/50	2/15723	0.0063501982706059	0.0334805682179858	0.0180200248089183	CTNNB1	1
GO:1902159	regulation of cyclic nucleotide-gated ion channel activity	1/50	2/15723	0.0063501982706059	0.0334805682179858	0.0180200248089183	CFTR	1
GO:1902823	negative regulation of late endosome to lysosome transport	1/50	2/15723	0.0063501982706059	0.0334805682179858	0.0180200248089183	LRRK2	1
GO:1902941	regulation of voltage-gated chloride channel activity	1/50	2/15723	0.0063501982706059	0.0334805682179858	0.0180200248089183	CFTR	1
GO:1902943	positive regulation of voltage-gated chloride channel activity	1/50	2/15723	0.0063501982706059	0.0334805682179858	0.0180200248089183	CFTR	1
GO:1903216	regulation of protein processing involved in protein targeting to mitochondrion	1/50	2/15723	0.0063501982706059	0.0334805682179858	0.0180200248089183	LRRK2	1
GO:1903217	negative regulation of protein processing involved in protein targeting to mitochondrion	1/50	2/15723	0.0063501982706059	0.0334805682179858	0.0180200248089183	LRRK2	1
GO:1903336	negative regulation of vacuolar transport	1/50	2/15723	0.0063501982706059	0.0334805682179858	0.0180200248089183	LRRK2	1
GO:1903840	response to arsenite(3-)	1/50	2/15723	0.0063501982706059	0.0334805682179858	0.0180200248089183	MYC	1
GO:1903841	cellular response to arsenite(3-)	1/50	2/15723	0.0063501982706059	0.0334805682179858	0.0180200248089183	MYC	1
GO:1904235	regulation of substrate-dependent cell migration, cell attachment to substrate	1/50	2/15723	0.0063501982706059	0.0334805682179858	0.0180200248089183	FN1	1
GO:1904237	positive regulation of substrate-dependent cell migration, cell attachment to substrate	1/50	2/15723	0.0063501982706059	0.0334805682179858	0.0180200248089183	FN1	1
GO:1904585	response to putrescine	1/50	2/15723	0.0063501982706059	0.0334805682179858	0.0180200248089183	MYC	1
GO:1904586	cellular response to putrescine	1/50	2/15723	0.0063501982706059	0.0334805682179858	0.0180200248089183	MYC	1
GO:1905775	negative regulation of DNA helicase activity	1/50	2/15723	0.0063501982706059	0.0334805682179858	0.0180200248089183	MCM2	1
GO:1990637	response to prolactin	1/50	2/15723	0.0063501982706059	0.0334805682179858	0.0180200248089183	MYC	1
GO:1990683	DNA double-strand break attachment to nuclear envelope	1/50	2/15723	0.0063501982706059	0.0334805682179858	0.0180200248089183	LMNA	1
GO:1990859	cellular response to endothelin	1/50	2/15723	0.0063501982706059	0.0334805682179858	0.0180200248089183	MYC	1
GO:2000017	positive regulation of determination of dorsal identity	1/50	2/15723	0.0063501982706059	0.0334805682179858	0.0180200248089183	CTNNB1	1
GO:2000620	positive regulation of histone H4-K16 acetylation	1/50	2/15723	0.0063501982706059	0.0334805682179858	0.0180200248089183	BRCA1	1
GO:1903844	regulation of cellular response to transforming growth factor beta stimulus	3/50	119/15723	0.00639625233730397	0.0336564706320042	0.0181146996018884	TP53/HSP90AB1/SNW1	3
GO:0071695	anatomical structure maturation	4/50	234/15723	0.00644491017227052	0.0337438044966722	0.018161704730288	APP/LRRK2/CFTR/CTNNB1	4
GO:0006270	DNA replication initiation	2/50	38/15723	0.00647646926425571	0.0337438044966722	0.018161704730288	MCM2/CDK2	2
GO:0045773	positive regulation of axon extension	2/50	38/15723	0.00647646926425571	0.0337438044966722	0.018161704730288	FN1/DISC1	2
GO:0051567	histone H3-K9 methylation	2/50	38/15723	0.00647646926425571	0.0337438044966722	0.018161704730288	BRCA1/LMNA	2
GO:0071634	regulation of transforming growth factor beta production	2/50	38/15723	0.00647646926425571	0.0337438044966722	0.018161704730288	FN1/HSP90AB1	2
GO:0034728	nucleosome organization	3/50	120/15723	0.00654572789202328	0.0340377850385211	0.018319931933093	MCM2/H3C1/NPM1	3
GO:1903313	positive regulation of mRNA metabolic process	3/50	121/15723	0.00669727904282634	0.034757698672359	0.0187074062870996	MOV10/HSPA8/SNW1	3
GO:1904407	positive regulation of nitric oxide metabolic process	2/50	39/15723	0.00681275835470131	0.0352105066623649	0.0189511181369242	HSP90AA1/HSP90AB1	2
GO:2000008	regulation of protein localization to cell surface	2/50	39/15723	0.00681275835470131	0.0352105066623649	0.0189511181369242	HSP90AB1/CTNNB1	2
GO:0071559	response to transforming growth factor beta	4/50	238/15723	0.00683642165529225	0.0352105066623649	0.0189511181369242	JUN/TP53/HSP90AB1/SNW1	4
GO:0001101	response to acid chemical	3/50	122/15723	0.00685091306100313	0.0352105066623649	0.0189511181369242	NTRK1/EGFR/MYC	3
GO:0022612	gland morphogenesis	3/50	122/15723	0.00685091306100313	0.0352105066623649	0.0189511181369242	ESR1/EGFR/CUL3	3
GO:0022898	regulation of transmembrane transporter activity	4/50	240/15723	0.00703797586019397	0.0360322625120355	0.019393406353227	APP/CFTR/SUMO1/HTT	4
GO:0031668	cellular response to extracellular stimulus	4/50	240/15723	0.00703797586019397	0.0360322625120355	0.019393406353227	LRRK2/TP53/HSPA8/SNW1	4
GO:0010863	positive regulation of phospholipase C activity	2/50	40/15723	0.00715684088015482	0.0362905201035767	0.019532406628741	ESR1/EGFR	2
GO:0045740	positive regulation of DNA replication	2/50	40/15723	0.00715684088015482	0.0362905201035767	0.019532406628741	EGFR/CDK2	2
GO:0048489	synaptic vesicle transport	2/50	40/15723	0.00715684088015482	0.0362905201035767	0.019532406628741	LRRK2/CTNNB1	2
GO:0060261	positive regulation of transcription initiation from RNA polymerase II promoter	2/50	40/15723	0.00715684088015482	0.0362905201035767	0.019532406628741	ESR1/TP53	2
GO:0070897	transcription preinitiation complex assembly	2/50	40/15723	0.00715684088015482	0.0362905201035767	0.019532406628741	ESR1/TP53	2
GO:0021537	telencephalon development	4/50	242/15723	0.00724343866895009	0.036659540744381	0.0197310221677306	LRRK2/EGFR/DISC1/CTNNB1	4
GO:0050673	epithelial cell proliferation	5/50	384/15723	0.00728295139484963	0.036789308760269	0.019800866348704	ESR1/JUN/EGFR/MYC/CTNNB1	5
GO:0032886	regulation of microtubule-based process	4/50	243/15723	0.00734764575641225	0.0370455447642686	0.0199387785585251	RNF4/XPO1/BRCA1/NPM1	4
GO:0003007	heart morphogenesis	4/50	246/15723	0.00766621705752061	0.0385783826120392	0.0207637877359392	JUN/TP53/MDM2/CTNNB1	4
GO:0043122	regulation of I-kappaB kinase/NF-kappaB signaling	4/50	247/15723	0.00777440385915483	0.0388573943087656	0.0209139583562301	ESR1/TRIM25/TNIP2/CTNNB1	4
GO:0043467	regulation of generation of precursor metabolites and energy	3/50	128/15723	0.00781684858730411	0.0388573943087656	0.0209139583562301	APP/TP53/MYC	3
GO:2001022	positive regulation of response to DNA damage stimulus	3/50	128/15723	0.00781684858730411	0.0388573943087656	0.0209139583562301	EGFR/BRCA1/MYC	3
GO:0031063	regulation of histone deacetylation	2/50	42/15723	0.00786818278424101	0.0388573943087656	0.0209139583562301	LRRK2/TP53	2
GO:0045981	positive regulation of nucleotide metabolic process	2/50	42/15723	0.00786818278424101	0.0388573943087656	0.0209139583562301	APP/MYC	2
GO:0051602	response to electrical stimulus	2/50	42/15723	0.00786818278424101	0.0388573943087656	0.0209139583562301	NTRK1/DISC1	2
GO:0071604	transforming growth factor beta production	2/50	42/15723	0.00786818278424101	0.0388573943087656	0.0209139583562301	FN1/HSP90AB1	2
GO:1900274	regulation of phospholipase C activity	2/50	42/15723	0.00786818278424101	0.0388573943087656	0.0209139583562301	ESR1/EGFR	2
GO:1900544	positive regulation of purine nucleotide metabolic process	2/50	42/15723	0.00786818278424101	0.0388573943087656	0.0209139583562301	APP/MYC	2
GO:2000378	negative regulation of reactive oxygen species metabolic process	2/50	42/15723	0.00786818278424101	0.0388573943087656	0.0209139583562301	TP53/BRCA1	2
GO:0006275	regulation of DNA replication	3/50	129/15723	0.00798525564995563	0.0393622639101902	0.0211856909828602	EGFR/TP53/CDK2	3
GO:0051348	negative regulation of transferase activity	4/50	251/15723	0.00821723584339514	0.0401472874743529	0.0216082090240623	TP53/YWHAG/HEXIM1/NPM1	4
GO:0007528	neuromuscular junction development	2/50	43/15723	0.00823534102038007	0.0401472874743529	0.0216082090240623	APP/LRRK2	2
GO:0042771	intrinsic apoptotic signaling pathway in response to DNA damage by p53 class mediator	2/50	43/15723	0.00823534102038007	0.0401472874743529	0.0216082090240623	TP53/SNW1	2
GO:0071364	cellular response to epidermal growth factor stimulus	2/50	43/15723	0.00823534102038007	0.0401472874743529	0.0216082090240623	EGFR/MYC	2
GO:0090317	negative regulation of intracellular protein transport	2/50	43/15723	0.00823534102038007	0.0401472874743529	0.0216082090240623	LRRK2/SUMO1	2
GO:1902116	negative regulation of organelle assembly	2/50	43/15723	0.00823534102038007	0.0401472874743529	0.0216082090240623	LRRK2/BRCA1	2
GO:0070555	response to interleukin-1	3/50	131/15723	0.00832848546063526	0.0404623513485793	0.0217777837694187	APP/MYC/TNIP2	3
GO:0007611	learning or memory	4/50	252/15723	0.0083304841011781	0.0404623513485793	0.0217777837694187	APP/NTRK1/EGFR/HTT	4
GO:0042391	regulation of membrane potential	5/50	398/15723	0.00843483063128088	0.0408942794043088	0.0220102575503067	APP/LRRK2/CFTR/SUMO1/MYC	5
GO:0001558	regulation of cell growth	5/50	399/15723	0.00852168282513161	0.0410777565543506	0.0221090092433514	ESR2/EGFR/TP53/FN1/DISC1	5
GO:0030522	intracellular receptor signaling pathway	4/50	254/15723	0.00856005533179097	0.0410777565543506	0.0221090092433514	ESR2/ESR1/BRCA1/SNW1	4
GO:0050804	modulation of chemical synaptic transmission	5/50	400/15723	0.00860915690455501	0.0410777565543506	0.0221090092433514	APP/NTRK1/LRRK2/YWHAG/DISC1	5
GO:0042551	neuron maturation	2/50	44/15723	0.00861009040469588	0.0410777565543506	0.0221090092433514	APP/LRRK2	2
GO:0001889	liver development	3/50	133/15723	0.00868030993628932	0.0410777565543506	0.0221090092433514	JUN/CUL3/MYC	3
GO:0043401	steroid hormone mediated signaling pathway	3/50	133/15723	0.00868030993628932	0.0410777565543506	0.0221090092433514	ESR2/ESR1/BRCA1	3
GO:0099177	regulation of trans-synaptic signaling	5/50	401/15723	0.00869725507515552	0.0410777565543506	0.0221090092433514	APP/NTRK1/LRRK2/YWHAG/DISC1	5
GO:0031330	negative regulation of cellular catabolic process	4/50	256/15723	0.00879375100969117	0.0410777565543506	0.0221090092433514	ELAVL1/LRRK2/TP53/HSP90AB1	4
GO:0032409	regulation of transporter activity	4/50	256/15723	0.00879375100969117	0.0410777565543506	0.0221090092433514	APP/CFTR/SUMO1/HTT	4
GO:0000086	G2/M transition of mitotic cell cycle	3/50	134/15723	0.00885945988321547	0.0410777565543506	0.0221090092433514	APP/BRCA1/CDK2	3
GO:0034341	response to interferon-gamma	3/50	134/15723	0.00885945988321547	0.0410777565543506	0.0221090092433514	TP53/MYC/HSP90AB1	3
GO:0034614	cellular response to reactive oxygen species	3/50	134/15723	0.00885945988321547	0.0410777565543506	0.0221090092433514	JUN/LRRK2/EGFR	3
GO:0048660	regulation of smooth muscle cell proliferation	3/50	134/15723	0.00885945988321547	0.0410777565543506	0.0221090092433514	JUN/MYC/CTNNB1	3
GO:0002762	negative regulation of myeloid leukocyte differentiation	2/50	45/15723	0.00899238094522717	0.0410777565543506	0.0221090092433514	MYC/CTNNB1	2
GO:0006110	regulation of glycolytic process	2/50	45/15723	0.00899238094522717	0.0410777565543506	0.0221090092433514	APP/MYC	2
GO:0090199	regulation of release of cytochrome c from mitochondria	2/50	45/15723	0.00899238094522717	0.0410777565543506	0.0221090092433514	TP53/LMNA	2
GO:1903202	negative regulation of oxidative stress-induced cell death	2/50	45/15723	0.00899238094522717	0.0410777565543506	0.0221090092433514	LRRK2/CTNNB1	2
GO:1990090	cellular response to nerve growth factor stimulus	2/50	45/15723	0.00899238094522717	0.0410777565543506	0.0221090092433514	APP/NTRK1	2
GO:0030177	positive regulation of Wnt signaling pathway	3/50	135/15723	0.00904077591203288	0.0410777565543506	0.0221090092433514	LRRK2/EGFR/DISC1	3
GO:2000377	regulation of reactive oxygen species metabolic process	3/50	135/15723	0.00904077591203288	0.0410777565543506	0.0221090092433514	TP53/BRCA1/GRB2	3
GO:0046034	ATP metabolic process	4/50	259/15723	0.00915209229162134	0.0410777565543506	0.0221090092433514	APP/TP53/MYC/HSPA8	4
GO:0014065	phosphatidylinositol 3-kinase signaling	3/50	136/15723	0.00922426358354031	0.0410777565543506	0.0221090092433514	NTRK1/EGFR/FN1	3
GO:0061008	hepaticobiliary system development	3/50	136/15723	0.00922426358354031	0.0410777565543506	0.0221090092433514	JUN/CUL3/MYC	3
GO:0035987	endodermal cell differentiation	2/50	46/15723	0.00938216288007896	0.0410777565543506	0.0221090092433514	FN1/CTNNB1	2
GO:0048806	genitalia development	2/50	46/15723	0.00938216288007896	0.0410777565543506	0.0221090092433514	ESR1/CTNNB1	2
GO:0019827	stem cell population maintenance	3/50	137/15723	0.00940992834266827	0.0410777565543506	0.0221090092433514	ELAVL1/MYC/CTNNB1	3
GO:0048659	smooth muscle cell proliferation	3/50	137/15723	0.00940992834266827	0.0410777565543506	0.0221090092433514	JUN/MYC/CTNNB1	3
GO:0000320	re-entry into mitotic cell cycle	1/50	3/15723	0.00951046098204045	0.0410777565543506	0.0221090092433514	MYC	1
GO:0006931	substrate-dependent cell migration, cell attachment to substrate	1/50	3/15723	0.00951046098204045	0.0410777565543506	0.0221090092433514	FN1	1
GO:0010525	regulation of transposition, RNA-mediated	1/50	3/15723	0.00951046098204045	0.0410777565543506	0.0221090092433514	MOV10	1
GO:0010526	negative regulation of transposition, RNA-mediated	1/50	3/15723	0.00951046098204045	0.0410777565543506	0.0221090092433514	MOV10	1
GO:0010909	positive regulation of heparan sulfate proteoglycan biosynthetic process	1/50	3/15723	0.00951046098204045	0.0410777565543506	0.0221090092433514	CTNNB1	1
GO:0021852	pyramidal neuron migration to cerebral cortex	1/50	3/15723	0.00951046098204045	0.0410777565543506	0.0221090092433514	DISC1	1
GO:0030997	regulation of centriole-centriole cohesion	1/50	3/15723	0.00951046098204045	0.0410777565543506	0.0221090092433514	CTNNB1	1
GO:0035377	transepithelial water transport	1/50	3/15723	0.00951046098204045	0.0410777565543506	0.0221090092433514	CFTR	1
GO:0036023	embryonic skeletal limb joint morphogenesis	1/50	3/15723	0.00951046098204045	0.0410777565543506	0.0221090092433514	CTNNB1	1
GO:0036520	astrocyte-dopaminergic neuron signaling	1/50	3/15723	0.00951046098204045	0.0410777565543506	0.0221090092433514	CTNNB1	1
GO:0043335	protein unfolding	1/50	3/15723	0.00951046098204045	0.0410777565543506	0.0221090092433514	HSP90AA1	1
GO:0043456	regulation of pentose-phosphate shunt	1/50	3/15723	0.00951046098204045	0.0410777565543506	0.0221090092433514	TP53	1
GO:0044338	canonical Wnt signaling pathway involved in mesenchymal stem cell differentiation	1/50	3/15723	0.00951046098204045	0.0410777565543506	0.0221090092433514	CTNNB1	1
GO:0060423	foregut regionalization	1/50	3/15723	0.00951046098204045	0.0410777565543506	0.0221090092433514	CTNNB1	1
GO:0060424	lung field specification	1/50	3/15723	0.00951046098204045	0.0410777565543506	0.0221090092433514	CTNNB1	1
GO:0060492	lung induction	1/50	3/15723	0.00951046098204045	0.0410777565543506	0.0221090092433514	CTNNB1	1
GO:0060523	prostate epithelial cord elongation	1/50	3/15723	0.00951046098204045	0.0410777565543506	0.0221090092433514	ESR1	1
GO:0060769	positive regulation of epithelial cell proliferation involved in prostate gland development	1/50	3/15723	0.00951046098204045	0.0410777565543506	0.0221090092433514	CTNNB1	1
GO:0061198	fungiform papilla formation	1/50	3/15723	0.00951046098204045	0.0410777565543506	0.0221090092433514	CTNNB1	1
GO:0061738	late endosomal microautophagy	1/50	3/15723	0.00951046098204045	0.0410777565543506	0.0221090092433514	HSPA8	1
GO:0061740	protein targeting to lysosome involved in chaperone-mediated autophagy	1/50	3/15723	0.00951046098204045	0.0410777565543506	0.0221090092433514	HSPA8	1
GO:0071409	cellular response to cycloheximide	1/50	3/15723	0.00951046098204045	0.0410777565543506	0.0221090092433514	MYC	1
GO:0072740	cellular response to anisomycin	1/50	3/15723	0.00951046098204045	0.0410777565543506	0.0221090092433514	JUN	1
GO:0090204	protein localization to nuclear pore	1/50	3/15723	0.00951046098204045	0.0410777565543506	0.0221090092433514	SUMO1	1
GO:0090234	regulation of kinetochore assembly	1/50	3/15723	0.00951046098204045	0.0410777565543506	0.0221090092433514	RNF4	1
GO:0140650	radial glia-guided pyramidal neuron migration	1/50	3/15723	0.00951046098204045	0.0410777565543506	0.0221090092433514	DISC1	1
GO:0150102	negative regulation of monocyte activation	1/50	3/15723	0.00951046098204045	0.0410777565543506	0.0221090092433514	FN1	1
GO:1902499	positive regulation of protein autoubiquitination	1/50	3/15723	0.00951046098204045	0.0410777565543506	0.0221090092433514	LRRK2	1
GO:1902689	negative regulation of NAD metabolic process	1/50	3/15723	0.00951046098204045	0.0410777565543506	0.0221090092433514	TP53	1
GO:1902822	regulation of late endosome to lysosome transport	1/50	3/15723	0.00951046098204045	0.0410777565543506	0.0221090092433514	LRRK2	1
GO:1903335	regulation of vacuolar transport	1/50	3/15723	0.00951046098204045	0.0410777565543506	0.0221090092433514	LRRK2	1
GO:1903660	negative regulation of complement-dependent cytotoxicity	1/50	3/15723	0.00951046098204045	0.0410777565543506	0.0221090092433514	HSP90AB1	1
GO:1903797	positive regulation of inorganic anion transmembrane transport	1/50	3/15723	0.00951046098204045	0.0410777565543506	0.0221090092433514	CFTR	1
GO:1903862	positive regulation of oxidative phosphorylation	1/50	3/15723	0.00951046098204045	0.0410777565543506	0.0221090092433514	MYC	1
GO:1904024	negative regulation of glucose catabolic process to lactate via pyruvate	1/50	3/15723	0.00951046098204045	0.0410777565543506	0.0221090092433514	TP53	1
GO:1905335	regulation of aggrephagy	1/50	3/15723	0.00951046098204045	0.0410777565543506	0.0221090092433514	HTT	1
GO:1905337	positive regulation of aggrephagy	1/50	3/15723	0.00951046098204045	0.0410777565543506	0.0221090092433514	HTT	1
GO:1905463	negative regulation of DNA duplex unwinding	1/50	3/15723	0.00951046098204045	0.0410777565543506	0.0221090092433514	MCM2	1
GO:1990839	response to endothelin	1/50	3/15723	0.00951046098204045	0.0410777565543506	0.0221090092433514	MYC	1
GO:2000468	regulation of peroxidase activity	1/50	3/15723	0.00951046098204045	0.0410777565543506	0.0221090092433514	LRRK2	1
GO:0016574	histone ubiquitination	2/50	47/15723	0.00977938667651215	0.0417319501490263	0.0224611115353178	BMI1/RNF2	2
GO:0042220	response to cocaine	2/50	47/15723	0.00977938667651215	0.0417319501490263	0.0224611115353178	EFTUD2/HSP90AB1	2
GO:0043618	regulation of transcription from RNA polymerase II promoter in response to stress	2/50	47/15723	0.00977938667651215	0.0417319501490263	0.0224611115353178	JUN/TP53	2
GO:0070849	response to epidermal growth factor	2/50	47/15723	0.00977938667651215	0.0417319501490263	0.0224611115353178	EGFR/MYC	2
GO:1990089	response to nerve growth factor	2/50	47/15723	0.00977938667651215	0.0417319501490263	0.0224611115353178	APP/NTRK1	2
GO:0030010	establishment of cell polarity	3/50	139/15723	0.00978781032907027	0.0417319501490263	0.0224611115353178	HTT/HSP90AA1/HSP90AB1	3
GO:0046328	regulation of JNK cascade	3/50	139/15723	0.00978781032907027	0.0417319501490263	0.0224611115353178	APP/EGFR/COPS5	3
GO:0098727	maintenance of cell number	3/50	139/15723	0.00978781032907027	0.0417319501490263	0.0224611115353178	ELAVL1/MYC/CTNNB1	3
GO:0031349	positive regulation of defense response	4/50	267/15723	0.0101541024899037	0.0429379587212346	0.0231102135532246	APP/LRRK2/HSP90AA1/HEXIM1	4
GO:0007030	Golgi organization	3/50	141/15723	0.0101744631442969	0.0429379587212346	0.0231102135532246	LRRK2/HTT/YWHAZ	3
GO:0008038	neuron recognition	2/50	48/15723	0.0101840030300364	0.0429379587212346	0.0231102135532246	APP/YWHAZ	2
GO:0030850	prostate gland development	2/50	48/15723	0.0101840030300364	0.0429379587212346	0.0231102135532246	ESR1/CTNNB1	2
GO:0048546	digestive tract morphogenesis	2/50	48/15723	0.0101840030300364	0.0429379587212346	0.0231102135532246	EGFR/CTNNB1	2
GO:0050982	detection of mechanical stimulus	2/50	48/15723	0.0101840030300364	0.0429379587212346	0.0231102135532246	NTRK1/CTNNB1	2
GO:0060260	regulation of transcription initiation from RNA polymerase II promoter	2/50	48/15723	0.0101840030300364	0.0429379587212346	0.0231102135532246	ESR1/TP53	2
GO:0043524	negative regulation of neuron apoptotic process	3/50	142/15723	0.0103710910171208	0.0436573545673085	0.0234974092217474	NTRK1/JUN/HSP90AB1	3
GO:1903131	mononuclear cell differentiation	5/50	420/15723	0.0104925935298362	0.0440988241539231	0.0237350184777009	NTRK1/JUN/TP53/MYC/CTNNB1	5
GO:0008347	glial cell migration	2/50	49/15723	0.0105959628635063	0.044322544974793	0.0238554302555447	DISC1/CTNNB1	2
GO:0043525	positive regulation of neuron apoptotic process	2/50	49/15723	0.0105959628635063	0.044322544974793	0.0238554302555447	TP53/CTNNB1	2
GO:0061647	histone H3-K9 modification	2/50	49/15723	0.0105959628635063	0.044322544974793	0.0238554302555447	BRCA1/LMNA	2
GO:0001890	placenta development	3/50	144/15723	0.0107709735277409	0.0449836563709748	0.024211255870065	EGFR/GRB2/HSP90AB1	3
GO:0007548	sex differentiation	4/50	274/15723	0.0110873648777062	0.0462322195843974	0.0248832617910784	ESR1/NTRK1/MYC/CTNNB1	4
GO:0016052	carbohydrate catabolic process	3/50	146/15723	0.0111797222220384	0.0465441496590986	0.0250511498522417	APP/TP53/MYC	3
GO:0042063	gliogenesis	4/50	276/15723	0.0113638700374376	0.0472366510020132	0.0254238702701952	APP/MYC/DISC1/CTNNB1	4
GO:2001236	regulation of extrinsic apoptotic signaling pathway	3/50	147/15723	0.011387432416989	0.0472605176367055	0.0254367158511442	BRCA1/HTT/LMNA	3
GO:0010823	negative regulation of mitochondrion organization	2/50	51/15723	0.0114417177930263	0.0473376530220057	0.025478231919441	TP53/LMNA	2
GO:2000179	positive regulation of neural precursor cell proliferation	2/50	51/15723	0.0114417177930263	0.0473376530220057	0.025478231919441	DISC1/CTNNB1	2
GO:0090287	regulation of cellular response to growth factor stimulus	4/50	277/15723	0.0115037821501642	0.0473649249974938	0.0254929103344453	TP53/HSP90AB1/CTNNB1/SNW1	4
GO:0048754	branching morphogenesis of an epithelial tube	3/50	149/15723	0.0118095456204822	0.0473649249974938	0.0254929103344453	ESR1/MYC/CTNNB1	3
GO:0021545	cranial nerve development	2/50	52/15723	0.0118754158634215	0.0473649249974938	0.0254929103344453	NTRK1/CTNNB1	2
GO:0043392	negative regulation of DNA binding	2/50	52/15723	0.0118754158634215	0.0473649249974938	0.0254929103344453	JUN/SUMO1	2
GO:0097479	synaptic vesicle localization	2/50	52/15723	0.0118754158634215	0.0473649249974938	0.0254929103344453	LRRK2/CTNNB1	2
GO:0007249	I-kappaB kinase/NF-kappaB signaling	4/50	280/15723	0.0119301951156541	0.0473649249974938	0.0254929103344453	ESR1/TRIM25/TNIP2/CTNNB1	4
GO:1903829	positive regulation of protein localization	5/50	434/15723	0.0119687352293574	0.0473649249974938	0.0254929103344453	EGFR/CFTR/LARP7/HSP90AB1/MEPCE	5
GO:0034248	regulation of cellular amide metabolic process	5/50	436/15723	0.0121906158059373	0.0473649249974938	0.0254929103344453	APP/ELAVL1/TP53/MOV10/NPM1	5
GO:0051168	nuclear export	3/50	151/15723	0.0122406094958221	0.0473649249974938	0.0254929103344453	XPO1/NXF1/NPM1	3
GO:0043620	regulation of DNA-templated transcription in response to stress	2/50	53/15723	0.0123162633606679	0.0473649249974938	0.0254929103344453	JUN/TP53	2
GO:0043666	regulation of phosphoprotein phosphatase activity	2/50	53/15723	0.0123162633606679	0.0473649249974938	0.0254929103344453	HTT/HSP90AB1	2
GO:0045428	regulation of nitric oxide biosynthetic process	2/50	53/15723	0.0123162633606679	0.0473649249974938	0.0254929103344453	HSP90AA1/HSP90AB1	2
GO:0071320	cellular response to cAMP	2/50	53/15723	0.0123162633606679	0.0473649249974938	0.0254929103344453	APP/CFTR	2
GO:0072132	mesenchyme morphogenesis	2/50	53/15723	0.0123162633606679	0.0473649249974938	0.0254929103344453	MYC/MDM2	2
GO:0060485	mesenchyme development	4/50	283/15723	0.0123666893197915	0.0473649249974938	0.0254929103344453	MYC/MDM2/FN1/CTNNB1	4
GO:0034767	positive regulation of ion transmembrane transport	3/50	152/15723	0.0124595076375897	0.0473649249974938	0.0254929103344453	CFTR/SUMO1/HTT	3
GO:0050792	regulation of viral process	3/50	152/15723	0.0124595076375897	0.0473649249974938	0.0254929103344453	TRIM25/LARP7/HEXIM1	3
GO:2001257	regulation of cation channel activity	3/50	152/15723	0.0124595076375897	0.0473649249974938	0.0254929103344453	APP/SUMO1/HTT	3
GO:0002265	astrocyte activation involved in immune response	1/50	4/15723	0.0126608730018181	0.0473649249974938	0.0254929103344453	APP	1
GO:0002309	T cell proliferation involved in immune response	1/50	4/15723	0.0126608730018181	0.0473649249974938	0.0254929103344453	TP53	1
GO:0007089	traversing start control point of mitotic cell cycle	1/50	4/15723	0.0126608730018181	0.0473649249974938	0.0254929103344453	MDM2	1
GO:0007161	calcium-independent cell-matrix adhesion	1/50	4/15723	0.0126608730018181	0.0473649249974938	0.0254929103344453	FN1	1
GO:0009794	regulation of mitotic cell cycle, embryonic	1/50	4/15723	0.0126608730018181	0.0473649249974938	0.0254929103344453	CTNNB1	1
GO:0010621	negative regulation of transcription by transcription factor localization	1/50	4/15723	0.0126608730018181	0.0473649249974938	0.0254929103344453	SUMO1	1
GO:0010908	regulation of heparan sulfate proteoglycan biosynthetic process	1/50	4/15723	0.0126608730018181	0.0473649249974938	0.0254929103344453	CTNNB1	1
GO:0014005	microglia development	1/50	4/15723	0.0126608730018181	0.0473649249974938	0.0254929103344453	APP	1
GO:0019659	glucose catabolic process to lactate	1/50	4/15723	0.0126608730018181	0.0473649249974938	0.0254929103344453	TP53	1
GO:0019660	glycolytic fermentation	1/50	4/15723	0.0126608730018181	0.0473649249974938	0.0254929103344453	TP53	1
GO:0019661	glucose catabolic process to lactate via pyruvate	1/50	4/15723	0.0126608730018181	0.0473649249974938	0.0254929103344453	TP53	1
GO:0021553	olfactory nerve development	1/50	4/15723	0.0126608730018181	0.0473649249974938	0.0254929103344453	NTRK1	1
GO:0022009	central nervous system vasculogenesis	1/50	4/15723	0.0126608730018181	0.0473649249974938	0.0254929103344453	CTNNB1	1
GO:0030951	establishment or maintenance of microtubule cytoskeleton polarity	1/50	4/15723	0.0126608730018181	0.0473649249974938	0.0254929103344453	LMNA	1
GO:0031585	regulation of inositol 1,4,5-trisphosphate-sensitive calcium-release channel activity	1/50	4/15723	0.0126608730018181	0.0473649249974938	0.0254929103344453	HTT	1
GO:0031587	positive regulation of inositol 1,4,5-trisphosphate-sensitive calcium-release channel activity	1/50	4/15723	0.0126608730018181	0.0473649249974938	0.0254929103344453	HTT	1
GO:0035879	plasma membrane lactate transport	1/50	4/15723	0.0126608730018181	0.0473649249974938	0.0254929103344453	MYC	1
GO:0045448	mitotic cell cycle, embryonic	1/50	4/15723	0.0126608730018181	0.0473649249974938	0.0254929103344453	CTNNB1	1
GO:0060431	primary lung bud formation	1/50	4/15723	0.0126608730018181	0.0473649249974938	0.0254929103344453	CTNNB1	1
GO:0060699	regulation of endoribonuclease activity	1/50	4/15723	0.0126608730018181	0.0473649249974938	0.0254929103344453	NPM1	1
GO:0060737	prostate gland morphogenetic growth	1/50	4/15723	0.0126608730018181	0.0473649249974938	0.0254929103344453	ESR1	1
GO:0060750	epithelial cell proliferation involved in mammary gland duct elongation	1/50	4/15723	0.0126608730018181	0.0473649249974938	0.0254929103344453	ESR1	1
GO:0060751	branch elongation involved in mammary gland duct branching	1/50	4/15723	0.0126608730018181	0.0473649249974938	0.0254929103344453	ESR1	1
GO:0061325	cell proliferation involved in outflow tract morphogenesis	1/50	4/15723	0.0126608730018181	0.0473649249974938	0.0254929103344453	CTNNB1	1
GO:0070245	positive regulation of thymocyte apoptotic process	1/50	4/15723	0.0126608730018181	0.0473649249974938	0.0254929103344453	TP53	1
GO:0070564	positive regulation of vitamin D receptor signaling pathway	1/50	4/15723	0.0126608730018181	0.0473649249974938	0.0254929103344453	SNW1	1
GO:0070602	regulation of centromeric sister chromatid cohesion	1/50	4/15723	0.0126608730018181	0.0473649249974938	0.0254929103344453	CTNNB1	1
GO:0071211	protein targeting to vacuole involved in autophagy	1/50	4/15723	0.0126608730018181	0.0473649249974938	0.0254929103344453	HSPA8	1
GO:0071464	cellular response to hydrostatic pressure	1/50	4/15723	0.0126608730018181	0.0473649249974938	0.0254929103344453	MYC	1
GO:0072131	kidney mesenchyme morphogenesis	1/50	4/15723	0.0126608730018181	0.0473649249974938	0.0254929103344453	MYC	1
GO:0072133	metanephric mesenchyme morphogenesis	1/50	4/15723	0.0126608730018181	0.0473649249974938	0.0254929103344453	MYC	1
GO:0072739	response to anisomycin	1/50	4/15723	0.0126608730018181	0.0473649249974938	0.0254929103344453	JUN	1
GO:0090168	Golgi reassembly	1/50	4/15723	0.0126608730018181	0.0473649249974938	0.0254929103344453	YWHAZ	1
GO:0090403	oxidative stress-induced premature senescence	1/50	4/15723	0.0126608730018181	0.0473649249974938	0.0254929103344453	TP53	1
GO:0097252	oligodendrocyte apoptotic process	1/50	4/15723	0.0126608730018181	0.0473649249974938	0.0254929103344453	TP53	1
GO:0150098	glial cell-neuron signaling	1/50	4/15723	0.0126608730018181	0.0473649249974938	0.0254929103344453	CTNNB1	1
GO:1900114	positive regulation of histone H3-K9 trimethylation	1/50	4/15723	0.0126608730018181	0.0473649249974938	0.0254929103344453	LMNA	1
GO:1901003	negative regulation of fermentation	1/50	4/15723	0.0126608730018181	0.0473649249974938	0.0254929103344453	TP53	1
GO:1901529	positive regulation of anion channel activity	1/50	4/15723	0.0126608730018181	0.0473649249974938	0.0254929103344453	CFTR	1
GO:1902688	regulation of NAD metabolic process	1/50	4/15723	0.0126608730018181	0.0473649249974938	0.0254929103344453	TP53	1
GO:1902730	positive regulation of proteoglycan biosynthetic process	1/50	4/15723	0.0126608730018181	0.0473649249974938	0.0254929103344453	CTNNB1	1
GO:1903450	regulation of G1 to G0 transition	1/50	4/15723	0.0126608730018181	0.0473649249974938	0.0254929103344453	TP53	1
GO:1904023	regulation of glucose catabolic process to lactate via pyruvate	1/50	4/15723	0.0126608730018181	0.0473649249974938	0.0254929103344453	TP53	1
GO:1904954	canonical Wnt signaling pathway involved in midbrain dopaminergic neuron differentiation	1/50	4/15723	0.0126608730018181	0.0473649249974938	0.0254929103344453	CTNNB1	1
GO:1905643	positive regulation of DNA methylation	1/50	4/15723	0.0126608730018181	0.0473649249974938	0.0254929103344453	MYC	1
GO:1905908	positive regulation of amyloid fibril formation	1/50	4/15723	0.0126608730018181	0.0473649249974938	0.0254929103344453	APP	1
GO:1990441	negative regulation of transcription from RNA polymerase II promoter in response to endoplasmic reticulum stress	1/50	4/15723	0.0126608730018181	0.0473649249974938	0.0254929103344453	JUN	1
GO:2000015	regulation of determination of dorsal identity	1/50	4/15723	0.0126608730018181	0.0473649249974938	0.0254929103344453	CTNNB1	1
GO:2000697	negative regulation of epithelial cell differentiation involved in kidney development	1/50	4/15723	0.0126608730018181	0.0473649249974938	0.0254929103344453	CTNNB1	1
GO:0050657	nucleic acid transport	3/50	153/15723	0.0126806548824361	0.0473649249974938	0.0254929103344453	XPO1/NXF1/NPM1	3
GO:0050658	RNA transport	3/50	153/15723	0.0126806548824361	0.0473649249974938	0.0254929103344453	XPO1/NXF1/NPM1	3
GO:0010970	transport along microtubule	3/50	155/15723	0.0131297109672321	0.0488264043064666	0.0262795126774505	APP/HTT/HSPA8	3
GO:0043488	regulation of mRNA stability	3/50	155/15723	0.0131297109672321	0.0488264043064666	0.0262795126774505	ELAVL1/MOV10/NPM1	3
GO:0001706	endoderm formation	2/50	55/15723	0.0132192150422485	0.0488264043064666	0.0262795126774505	FN1/CTNNB1	2
GO:0001836	release of cytochrome c from mitochondria	2/50	55/15723	0.0132192150422485	0.0488264043064666	0.0262795126774505	TP53/LMNA	2
GO:0002218	activation of innate immune response	2/50	55/15723	0.0132192150422485	0.0488264043064666	0.0262795126774505	HSP90AA1/HEXIM1	2
GO:0009948	anterior/posterior axis specification	2/50	55/15723	0.0132192150422485	0.0488264043064666	0.0262795126774505	CTNNB1/RNF2	2
GO:0010518	positive regulation of phospholipase activity	2/50	55/15723	0.0132192150422485	0.0488264043064666	0.0262795126774505	ESR1/EGFR	2
GO:0043388	positive regulation of DNA binding	2/50	55/15723	0.0132192150422485	0.0488264043064666	0.0262795126774505	MYC/CTNNB1	2
GO:0030307	positive regulation of cell growth	3/50	156/15723	0.0133576266964079	0.0492005916651025	0.0264809090648087	EGFR/FN1/DISC1	3
GO:0051236	establishment of RNA localization	3/50	156/15723	0.0133576266964079	0.0492005916651025	0.0264809090648087	XPO1/NXF1/NPM1	3

## Sheet: enrichGO_Prey_hubs
ID	Description	GeneRatio	BgRatio	pvalue	p.adjust	qvalue	geneID	Count
GO:0006457	protein folding	22/50	170/10546	5.47130528178758e-27	8.69937539804225e-24	6.30063997713222e-24	HSPA8/HSP90AB1/HSP90AA1/CCT3/CCT2/HSPA5/CCT6A/TCP1/CCT4/CCT7/HSPD1/CDC37/CCT5/HSPA9/CANX/CCT8/HSPB1/DNAJA1/BAG2/RUVBL2/FKBP5/CSNK2A1	22
GO:0061077	chaperone-mediated protein folding	14/50	60/10546	5.86561432505164e-21	3.44134841272729e-18	2.49244300796005e-18	HSPA8/CCT3/CCT2/HSPA5/CCT6A/TCP1/CCT4/CCT7/CCT5/HSPA9/CCT8/HSPB1/FKBP5/CSNK2A1	14
GO:1904874	positive regulation of telomerase RNA localization to Cajal body	10/50	15/10546	6.49311021269299e-21	3.44134841272729e-18	2.49244300796005e-18	CCT3/CCT2/CCT6A/TCP1/CCT4/CCT7/CCT5/CCT8/RUVBL2/RUVBL1	10
GO:1904872	regulation of telomerase RNA localization to Cajal body	10/50	18/10546	9.36372871122628e-20	3.72208216271245e-17	2.69576821317936e-17	CCT3/CCT2/CCT6A/TCP1/CCT4/CCT7/CCT5/CCT8/RUVBL2/RUVBL1	10
GO:0090670	RNA localization to Cajal body	10/50	19/10546	1.96996137817927e-19	3.9152982391313e-17	2.83570756280016e-17	CCT3/CCT2/CCT6A/TCP1/CCT4/CCT7/CCT5/CCT8/RUVBL2/RUVBL1	10
GO:0090671	telomerase RNA localization to Cajal body	10/50	19/10546	1.96996137817927e-19	3.9152982391313e-17	2.83570756280016e-17	CCT3/CCT2/CCT6A/TCP1/CCT4/CCT7/CCT5/CCT8/RUVBL2/RUVBL1	10
GO:0090672	telomerase RNA localization	10/50	19/10546	1.96996137817927e-19	3.9152982391313e-17	2.83570756280016e-17	CCT3/CCT2/CCT6A/TCP1/CCT4/CCT7/CCT5/CCT8/RUVBL2/RUVBL1	10
GO:0090685	RNA localization to nucleus	10/50	19/10546	1.96996137817927e-19	3.9152982391313e-17	2.83570756280016e-17	CCT3/CCT2/CCT6A/TCP1/CCT4/CCT7/CCT5/CCT8/RUVBL2/RUVBL1	10
GO:1904851	positive regulation of establishment of protein localization to telomere	8/50	10/10546	6.33837118770094e-18	1.11977890982717e-15	8.11014980040331e-16	CCT3/CCT2/CCT6A/TCP1/CCT4/CCT7/CCT5/CCT8	8
GO:0070203	regulation of establishment of protein localization to telomere	8/50	11/10546	2.31583520134041e-17	3.06848164177604e-15	2.22238921953194e-15	CCT3/CCT2/CCT6A/TCP1/CCT4/CCT7/CCT5/CCT8	8
GO:1904869	regulation of protein localization to Cajal body	8/50	11/10546	2.31583520134041e-17	3.06848164177604e-15	2.22238921953194e-15	CCT3/CCT2/CCT6A/TCP1/CCT4/CCT7/CCT5/CCT8	8
GO:1904871	positive regulation of protein localization to Cajal body	8/50	11/10546	2.31583520134041e-17	3.06848164177604e-15	2.22238921953194e-15	CCT3/CCT2/CCT6A/TCP1/CCT4/CCT7/CCT5/CCT8	8
GO:0070202	regulation of establishment of protein localization to chromosome	8/50	12/10546	6.92288941786892e-17	6.87962135900724e-15	4.98265856786092e-15	CCT3/CCT2/CCT6A/TCP1/CCT4/CCT7/CCT5/CCT8	8
GO:1903405	protein localization to nuclear body	8/50	12/10546	6.92288941786892e-17	6.87962135900724e-15	4.98265856786092e-15	CCT3/CCT2/CCT6A/TCP1/CCT4/CCT7/CCT5/CCT8	8
GO:1904816	positive regulation of protein localization to chromosome, telomeric region	8/50	12/10546	6.92288941786892e-17	6.87962135900724e-15	4.98265856786092e-15	CCT3/CCT2/CCT6A/TCP1/CCT4/CCT7/CCT5/CCT8	8
GO:1904867	protein localization to Cajal body	8/50	12/10546	6.92288941786892e-17	6.87962135900724e-15	4.98265856786092e-15	CCT3/CCT2/CCT6A/TCP1/CCT4/CCT7/CCT5/CCT8	8
GO:1990173	protein localization to nucleoplasm	8/50	13/10546	1.79357345683874e-16	1.67751870374917e-14	1.21496554909076e-14	CCT3/CCT2/CCT6A/TCP1/CCT4/CCT7/CCT5/CCT8	8
GO:1904814	regulation of protein localization to chromosome, telomeric region	8/50	14/10546	4.17017534323253e-16	3.68365488652207e-14	2.66793674005637e-14	CCT3/CCT2/CCT6A/TCP1/CCT4/CCT7/CCT5/CCT8	8
GO:0070199	establishment of protein localization to chromosome	9/50	25/10546	1.09198334499324e-15	9.1381764133645e-14	6.61844753142719e-14	CCT3/CCT2/CCT6A/TCP1/CCT4/CCT7/CCT5/CCT8/RUVBL2	9
GO:0070200	establishment of protein localization to telomere	8/50	16/10546	1.77457380846951e-15	1.41078617773326e-13	1.02178091919245e-13	CCT3/CCT2/CCT6A/TCP1/CCT4/CCT7/CCT5/CCT8	8
GO:0050821	protein stabilization	14/50	151/10546	4.98132458055437e-15	3.77157432527688e-13	2.73161357951202e-13	HSP90AB1/HSP90AA1/CCT3/CCT2/CCT6A/TCP1/CCT4/CCT7/HSPD1/CDC37/CCT5/CCT8/BAG2/SEC16A	14
GO:0031647	regulation of protein stability	16/50	238/10546	6.81002648774879e-15	4.92179187069117e-13	3.56467415196037e-13	HSPA8/HSP90AB1/HSP90AA1/CCT3/CCT2/CCT6A/TCP1/CCT4/CCT7/HSPD1/CDC37/CCT5/CCT8/PRKDC/BAG2/SEC16A	16
GO:0051054	positive regulation of DNA metabolic process	15/50	224/10546	5.89406540126561e-14	4.07459303826622e-12	2.95107896978699e-12	HSP90AB1/HSP90AA1/CCT3/CCT2/CCT6A/TCP1/CCT4/CCT7/CCT5/CCT8/PRKDC/ACTB/RUVBL2/RUVBL1/TRIM28	15
GO:2000573	positive regulation of DNA biosynthetic process	10/50	64/10546	2.76398614948828e-13	1.83114082403598e-11	1.32622844190359e-11	HSP90AB1/HSP90AA1/CCT3/CCT2/CCT6A/TCP1/CCT4/CCT7/CCT5/CCT8	10
GO:0007004	telomere maintenance via telomerase	10/50	66/10546	3.82322589378959e-13	2.35530929102319e-11	1.70586452458085e-11	HSP90AB1/HSP90AA1/CCT3/CCT2/CCT6A/TCP1/CCT4/CCT7/CCT5/CCT8	10
GO:0007339	binding of sperm to zona pellucida	7/50	16/10546	3.85144915513226e-13	2.35530929102319e-11	1.70586452458085e-11	CCT3/CCT2/TCP1/CCT4/CCT7/CCT5/CCT8	7
GO:1901998	toxin transport	8/50	28/10546	4.10681513931074e-13	2.41845780426077e-11	1.75160068709783e-11	CCT3/CCT2/HSPA5/TCP1/CCT4/CCT7/CCT5/CCT8	8
GO:0006278	RNA-templated DNA biosynthetic process	10/50	67/10546	4.47840676136922e-13	2.54309526806323e-11	1.84187105148042e-11	HSP90AB1/HSP90AA1/CCT3/CCT2/CCT6A/TCP1/CCT4/CCT7/CCT5/CCT8	10
GO:0070198	protein localization to chromosome, telomeric region	8/50	29/10546	5.65120785005906e-13	3.09842085572203e-11	2.24407309907971e-11	CCT3/CCT2/CCT6A/TCP1/CCT4/CCT7/CCT5/CCT8	8
GO:1900182	positive regulation of protein localization to nucleus	10/50	72/10546	9.51665894583877e-13	5.04382924129455e-11	3.65306136377109e-11	HSP90AB1/CCT3/CCT2/CCT6A/TCP1/CCT4/CCT7/CCT5/CCT8/TRIM28	10
GO:0035036	sperm-egg recognition	7/50	18/10546	1.06376483675201e-12	5.45608416269578e-11	3.95164255146586e-11	CCT3/CCT2/TCP1/CCT4/CCT7/CCT5/CCT8	7
GO:0010833	telomere maintenance via telomere lengthening	10/50	76/10546	1.67073688925267e-12	8.30147391847422e-11	6.01245446329745e-11	HSP90AB1/HSP90AA1/CCT3/CCT2/CCT6A/TCP1/CCT4/CCT7/CCT5/CCT8	10
GO:0032212	positive regulation of telomere maintenance via telomerase	8/50	33/10546	1.80225173354633e-12	8.6835765343596e-11	6.2891974370006e-11	CCT3/CCT2/CCT6A/TCP1/CCT4/CCT7/CCT5/CCT8	8
GO:0042026	protein refolding	7/50	20/10546	2.5727475956528e-12	1.20313784620234e-10	8.71388814131321e-11	HSPA8/HSP90AA1/HSPA5/HSPD1/HSPA9/HSPB1/DNAJA1	7
GO:0072594	establishment of protein localization to organelle	16/50	354/10546	3.23349876462342e-12	1.46893229592892e-10	1.06389402962346e-10	HSPA8/HSP90AB1/HSP90AA1/CCT3/CCT2/HSPA5/CCT6A/TCP1/CCT4/CCT7/HSPD1/CCT5/CCT8/DNAJA1/RUVBL2/TRIM28	16
GO:1904358	positive regulation of telomere maintenance via telomere lengthening	8/50	36/10546	3.88634116529987e-12	1.71646734800744e-10	1.24317463006961e-10	CCT3/CCT2/CCT6A/TCP1/CCT4/CCT7/CCT5/CCT8	8
GO:0000723	telomere maintenance	11/50	123/10546	8.78404326396003e-12	3.77476453775579e-10	2.73392413393237e-10	HSP90AB1/HSP90AA1/CCT3/CCT2/CCT6A/TCP1/CCT4/CCT7/CCT5/CCT8/PRKDC	11
GO:0051052	regulation of DNA metabolic process	16/50	393/10546	1.577238502683e-11	6.59345048024039e-10	4.77539544878053e-10	HSP90AB1/HSP90AA1/CCT3/CCT2/CCT6A/TCP1/CCT4/CCT7/CCT5/CCT8/PRKDC/ACTB/PPP2R1A/RUVBL2/RUVBL1/TRIM28	16
GO:0032200	telomere organization	11/50	130/10546	1.61726143854953e-11	6.59345048024039e-10	4.77539544878053e-10	HSP90AB1/HSP90AA1/CCT3/CCT2/CCT6A/TCP1/CCT4/CCT7/CCT5/CCT8/PRKDC	11
GO:2000278	regulation of DNA biosynthetic process	10/50	104/10546	4.14516609097876e-11	1.64770352116406e-09	1.19337150092915e-09	HSP90AB1/HSP90AA1/CCT3/CCT2/CCT6A/TCP1/CCT4/CCT7/CCT5/CCT8	10
GO:0032206	positive regulation of telomere maintenance	8/50	50/10546	6.56046497540197e-11	2.54418031972906e-09	1.84265691478556e-09	CCT3/CCT2/CCT6A/TCP1/CCT4/CCT7/CCT5/CCT8	8
GO:0032210	regulation of telomere maintenance via telomerase	8/50	52/10546	9.13059499886718e-11	3.45658239242829e-09	2.50347642324829e-09	CCT3/CCT2/CCT6A/TCP1/CCT4/CCT7/CCT5/CCT8	8
GO:1900180	regulation of protein localization to nucleus	10/50	113/10546	9.55667613242183e-11	3.53374768617459e-09	2.55936442811983e-09	HSP90AB1/CCT3/CCT2/CCT6A/TCP1/CCT4/CCT7/CCT5/CCT8/TRIM28	10
GO:0009988	cell-cell recognition	7/50	32/10546	1.07011578593476e-10	3.86700931735514e-09	2.80073365983881e-09	CCT3/CCT2/TCP1/CCT4/CCT7/CCT5/CCT8	7
GO:2001252	positive regulation of chromosome organization	9/50	83/10546	1.43278385633401e-10	5.06250295904684e-09	3.6665860557413e-09	CCT3/CCT2/CCT6A/TCP1/CCT4/CCT7/CCT5/CCT8/TRIM28	9
GO:0034502	protein localization to chromosome	9/50	84/10546	1.5990774992376e-10	5.52724613866911e-09	4.0031825724621e-09	CCT3/CCT2/CCT6A/TCP1/CCT4/CCT7/CCT5/CCT8/RUVBL2	9
GO:1904356	regulation of telomere maintenance via telomere lengthening	8/50	59/10546	2.62433281302596e-10	8.87806206959846e-09	6.43005620929541e-09	CCT3/CCT2/CCT6A/TCP1/CCT4/CCT7/CCT5/CCT8	8
GO:0033044	regulation of chromosome organization	11/50	194/10546	1.22837080385459e-09	4.06897828776833e-08	2.94701241100202e-08	CCT3/CCT2/CCT6A/TCP1/CCT4/CCT7/CCT5/CCT8/RUVBL2/RUVBL1/TRIM28	11
GO:0071897	DNA biosynthetic process	10/50	156/10546	2.32195460843689e-09	7.42790947171429e-08	5.37976362929853e-08	HSP90AB1/HSP90AA1/CCT3/CCT2/CCT6A/TCP1/CCT4/CCT7/CCT5/CCT8	10
GO:0032204	regulation of telomere maintenance	8/50	77/10546	2.3358205885894e-09	7.42790947171429e-08	5.37976362929853e-08	CCT3/CCT2/CCT6A/TCP1/CCT4/CCT7/CCT5/CCT8	8
GO:0008037	cell recognition	8/50	87/10546	6.25972070458047e-09	1.9515599843692e-07	1.41344364309825e-07	CCT3/CCT2/TCP1/CCT4/CCT7/CCT5/CCT8/YWHAZ	8
GO:1904951	positive regulation of establishment of protein localization	11/50	227/10546	6.44151367401713e-09	1.9696166810937e-07	1.42652144926614e-07	HSP90AB1/CCT3/CCT2/CCT6A/TCP1/CCT4/CCT7/CCT5/CCT8/YWHAE/TRIM28	11
GO:0006403	RNA localization	10/50	176/10546	7.48588590699357e-09	2.24576577209807e-07	1.62652615337656e-07	CCT3/CCT2/CCT6A/TCP1/CCT4/CCT7/CCT5/CCT8/RUVBL2/RUVBL1	10
GO:0070201	regulation of establishment of protein localization	13/50	372/10546	1.15381252580828e-08	3.39733688154661e-07	2.46056706283482e-07	HSPA8/HSP90AB1/CCT3/CCT2/CCT6A/TCP1/CCT4/CCT7/CCT5/CCT8/YWHAE/DNAJA1/TRIM28	13
GO:0021762	substantia nigra development	6/50	37/10546	1.73254165782877e-08	5.0086204289959e-07	3.62756090653526e-07	HSPA5/YWHAE/ACTB/YWHAH/SEC16A/YWHAQ	6
GO:0034504	protein localization to nucleus	11/50	253/10546	1.99175021341944e-08	5.65514792738733e-07	4.09581716819711e-07	HSP90AB1/CCT3/CCT2/CCT6A/TCP1/CCT4/CCT7/CCT5/CCT8/YWHAE/TRIM28	11
GO:0007338	single fertilization	7/50	69/10546	3.00455557876812e-08	8.3811287197216e-07	6.07014552755738e-07	CCT3/CCT2/TCP1/CCT4/CCT7/CCT5/CCT8	7
GO:0006986	response to unfolded protein	8/50	111/10546	4.3423636258577e-08	1.19040658019202e-06	8.62168022992436e-07	HSPA8/HSP90AB1/HSP90AA1/HSPA5/HSPD1/HSPA9/HSPB1/DNAJA1	8
GO:0048857	neural nucleus development	6/50	46/10546	6.75894242335995e-08	1.82147770392243e-06	1.31922979681638e-06	HSPA5/YWHAE/ACTB/YWHAH/SEC16A/YWHAQ	6
GO:0035966	response to topologically incorrect protein	8/50	131/10546	1.58418539564663e-07	4.19809129846356e-06	3.04052425059194e-06	HSPA8/HSP90AB1/HSP90AA1/HSPA5/HSPD1/HSPA9/HSPB1/DNAJA1	8
GO:0006605	protein targeting	10/50	248/10546	1.93889154121554e-07	5.05383205005361e-06	3.66030603294184e-06	HSPA8/HSP90AA1/HSPA5/YWHAG/HSPD1/CDC37/YWHAE/YWHAZ/YWHAB/YWHAQ	10
GO:0009566	fertilization	7/50	92/10546	2.24667442409339e-07	5.76163279727175e-06	4.17294027157583e-06	CCT3/CCT2/TCP1/CCT4/CCT7/CCT5/CCT8	7
GO:0051973	positive regulation of telomerase activity	5/50	30/10546	2.5432255233175e-07	6.41861679694416e-06	4.64876979533724e-06	HSP90AB1/HSP90AA1/CCT2/TCP1/CCT4	5
GO:1903829	positive regulation of protein localization	11/50	332/10546	3.17524330209668e-07	7.88849507864643e-06	5.71334896791738e-06	HSP90AB1/CCT3/CCT2/CCT6A/TCP1/CCT4/CCT7/CCT5/CCT8/YWHAE/TRIM28	11
GO:0030901	midbrain development	6/50	66/10546	6.10250147608603e-07	1.49276574568874e-05	1.08115572709929e-05	HSPA5/YWHAE/ACTB/YWHAH/SEC16A/YWHAQ	6
GO:0006458	'de novo' protein folding	5/50	37/10546	7.58766102522625e-07	1.8279365197136e-05	1.32390768127552e-05	HSPA8/CCT2/HSPA5/HSPD1/HSPA9	5
GO:0090666	scaRNA localization to Cajal body	3/50	5/10546	9.96228217825429e-07	2.36418338260065e-05	1.71229170510765e-05	CCT2/TCP1/CCT4	3
GO:0051972	regulation of telomerase activity	5/50	42/10546	1.45462547837284e-06	3.40125663325415e-05	2.46340599588218e-05	HSP90AB1/HSP90AA1/CCT2/TCP1/CCT4	5
GO:0051131	chaperone-mediated protein complex assembly	4/50	19/10546	1.64443039916385e-06	3.78933961546452e-05	2.74448033056484e-05	HSP90AB1/HSP90AA1/CCT2/HSPD1	4
GO:0022618	ribonucleoprotein complex assembly	7/50	158/10546	8.62655512187544e-06	0.000195946037768313	0.000141916560952357	HSP90AB1/HSP90AA1/PRKDC/RUVBL2/DHX30/RUVBL1/SNRNP200	7
GO:0010638	positive regulation of organelle organization	10/50	378/10546	8.85416321997155e-06	0.000198283373517673	0.000143609407896944	CCT3/CCT2/CCT6A/TCP1/CCT4/CCT7/CCT5/CCT8/SLC25A5/TRIM28	10
GO:0071826	ribonucleoprotein complex subunit organization	7/50	165/10546	1.14611898228892e-05	0.000253101275255469	0.000183312012664338	HSP90AB1/HSP90AA1/PRKDC/RUVBL2/DHX30/RUVBL1/SNRNP200	7
GO:0009266	response to temperature stimulus	6/50	115/10546	1.58528821537613e-05	0.000345288803075075	0.000250080073197042	HSP90AB1/HSP90AA1/HSPD1/HSPB1/YWHAE/DNAJA1	6
GO:0051084	'de novo' post-translational protein folding	4/50	34/10546	1.867149948618e-05	0.000401184921392246	0.000290563590866016	HSPA8/CCT2/HSPA5/HSPA9	4
GO:0009408	response to heat	5/50	77/10546	2.98282083346111e-05	0.000632358016693756	0.000457993823411432	HSP90AB1/HSP90AA1/HSPB1/YWHAE/DNAJA1	5
GO:0045739	positive regulation of DNA repair	5/50	85/10546	4.81308034736409e-05	0.00100694707267223	0.00072929500000226	PRKDC/ACTB/RUVBL2/RUVBL1/TRIM28	5
GO:0019953	sexual reproduction	10/50	474/10546	6.21176569133827e-05	0.0012826892791205	0.000929005012484493	CCT3/CCT2/TCP1/CCT4/CCT7/CCT5/CCT8/UBB/PPP2R1A/RUVBL1	10
GO:1902949	positive regulation of tau-protein kinase activity	2/50	3/10546	6.58920384193456e-05	0.00134318386008666	0.000972819028755251	HSP90AB1/HSP90AA1	2
GO:0022613	ribonucleoprotein complex biogenesis	9/50	390/10546	7.6917567877429e-05	0.00154808775854572	0.00112122344114467	HSP90AB1/HSP90AA1/C1QBP/PRKDC/RPL26L1/RUVBL2/DHX30/RUVBL1/SNRNP200	9
GO:0043968	histone H2A acetylation	3/50	21/10546	0.000125594871169187	0.0024961980644876	0.00180790511919857	ACTB/RUVBL2/RUVBL1	3
GO:0140021	mitochondrial ADP transmembrane transport	2/50	4/10546	0.000131384248944372	0.00254757263197014	0.00184511384268476	SLC25A5/SLC25A6	2
GO:1990544	mitochondrial ATP transmembrane transport	2/50	4/10546	0.000131384248944372	0.00254757263197014	0.00184511384268476	SLC25A5/SLC25A6	2
GO:2000781	positive regulation of double-strand break repair	4/50	58/10546	0.000157103629206063	0.00300957554744146	0.00217972568613105	PRKDC/ACTB/RUVBL2/RUVBL1	4
GO:0031396	regulation of protein ubiquitination	6/50	177/10546	0.000176839758234867	0.00334732399515998	0.00242434455524993	HSP90AB1/HSP90AA1/HSPA5/UBB/DNAJA1/BAG2	6
GO:2001022	positive regulation of response to DNA damage stimulus	5/50	115/10546	0.000202418462285019	0.00378641594156682	0.00274236282030725	PRKDC/ACTB/RUVBL2/RUVBL1/TRIM28	5
GO:1902947	regulation of tau-protein kinase activity	2/50	5/10546	0.000218309596095403	0.00403618904408943	0.00292326435897639	HSP90AB1/HSP90AA1	2
GO:2001233	regulation of apoptotic signaling pathway	7/50	266/10546	0.000237061295738211	0.00433249954280179	0.00313787123457475	UBB/HSPB1/SLC25A5/DNAJA1/PPP2R1A/SLC25A6/CSNK2A1	7
GO:0015866	ADP transport	2/50	6/10546	0.000326471495779466	0.00583246829538596	0.00422424383657877	SLC25A5/SLC25A6	2
GO:1905323	telomerase holoenzyme complex assembly	2/50	6/10546	0.000326471495779466	0.00583246829538596	0.00422424383657877	HSP90AB1/HSP90AA1	2
GO:0051085	chaperone cofactor-dependent protein refolding	3/50	29/10546	0.000335962403099979	0.00593533578809962	0.0042987470057471	HSPA8/HSPA5/HSPA9	3
GO:1903320	regulation of protein modification by small protein conjugation or removal	6/50	202/10546	0.000361047608004896	0.00630841424975588	0.00456895411402379	HSP90AB1/HSP90AA1/HSPA5/UBB/DNAJA1/BAG2	6
GO:0031400	negative regulation of protein modification process	8/50	379/10546	0.00036934812204528	0.00638329906578255	0.00462319045214572	YWHAG/HSPB1/YWHAE/DNAJA1/PRKDC/BAG2/YWHAB/PPP2R1A	8
GO:0006282	regulation of DNA repair	5/50	135/10546	0.000425900808519583	0.007281529952109	0.00527374628772409	PRKDC/ACTB/RUVBL2/RUVBL1/TRIM28	5
GO:0045936	negative regulation of phosphate metabolic process	7/50	302/10546	0.000511280173209279	0.00864824973832717	0.0062636115284541	YWHAG/HSPB1/YWHAE/DNAJA1/PRKDC/YWHAB/PPP2R1A	7
GO:0010563	negative regulation of phosphorus metabolic process	7/50	303/10546	0.000521491935145559	0.00872812817769935	0.00632146456564256	YWHAG/HSPB1/YWHAE/DNAJA1/PRKDC/YWHAB/PPP2R1A	7
GO:1905168	positive regulation of double-strand break repair via homologous recombination	3/50	34/10546	0.000541093310953421	0.00896185796266603	0.00649074651516494	ACTB/RUVBL2/RUVBL1	3
GO:0034620	cellular response to unfolded protein	4/50	81/10546	0.000568674276268848	0.00932156803368523	0.00675127138619771	HSPA8/HSPA5/HSPD1/HSPA9	4
GO:0002831	regulation of response to biotic stimulus	6/50	228/10546	0.000686005411196836	0.0111300877939078	0.00806111621750095	HSP90AB1/HSP90AA1/C1QBP/HSPD1/CDC37/PRKDC	6
GO:0097190	apoptotic signaling pathway	8/50	417/10546	0.00069667794831152	0.0111890700789426	0.00810383493304416	UBB/HSPB1/SLC25A5/DNAJA1/PRKDC/PPP2R1A/SLC25A6/CSNK2A1	8
GO:0000492	box C/D snoRNP assembly	2/50	9/10546	0.000776430393113598	0.012103179657359	0.00876589112555496	RUVBL2/RUVBL1	2
GO:0098974	postsynaptic actin cytoskeleton organization	2/50	9/10546	0.000776430393113598	0.012103179657359	0.00876589112555496	ACTBL2/ACTB	2
GO:1901029	negative regulation of mitochondrial outer membrane permeabilization involved in apoptotic signaling pathway	2/50	9/10546	0.000776430393113598	0.012103179657359	0.00876589112555496	SLC25A5/SLC25A6	2
GO:0034975	protein folding in endoplasmic reticulum	2/50	10/10546	0.000967598907120703	0.0146522120221135	0.010612062199399	HSPA5/CANX	2
GO:0060330	regulation of response to interferon-gamma	2/50	10/10546	0.000967598907120703	0.0146522120221135	0.010612062199399	HSP90AB1/CDC37	2
GO:0060334	regulation of interferon-gamma-mediated signaling pathway	2/50	10/10546	0.000967598907120703	0.0146522120221135	0.010612062199399	HSP90AB1/CDC37	2
GO:0007006	mitochondrial membrane organization	4/50	97/10546	0.00112024718356888	0.0168037077535332	0.0121703120042141	HSP90AA1/HSPA9/SLC25A5/SLC25A6	4
GO:2000779	regulation of double-strand break repair	4/50	98/10546	0.00116386850457349	0.0168889609525459	0.0122320577835718	PRKDC/ACTB/RUVBL2/RUVBL1	4
GO:2001234	negative regulation of apoptotic signaling pathway	5/50	169/10546	0.00117835101247546	0.0168889609525459	0.0122320577835718	HSPB1/SLC25A5/DNAJA1/SLC25A6/CSNK2A1	5
GO:0000491	small nucleolar ribonucleoprotein complex assembly	2/50	11/10546	0.00117904067027207	0.0168889609525459	0.0122320577835718	RUVBL2/RUVBL1	2
GO:0015867	ATP transport	2/50	11/10546	0.00117904067027207	0.0168889609525459	0.0122320577835718	SLC25A5/SLC25A6	2
GO:0099188	postsynaptic cytoskeleton organization	2/50	11/10546	0.00117904067027207	0.0168889609525459	0.0122320577835718	ACTBL2/ACTB	2
GO:0035967	cellular response to topologically incorrect protein	4/50	100/10546	0.00125466653188565	0.0178117838008766	0.0129004246793506	HSPA8/HSPA5/HSPD1/HSPA9	4
GO:0071407	cellular response to organic cyclic compound	7/50	358/10546	0.00139017175177449	0.0195147780688166	0.0141338412494441	HSPA8/HSP90AB1/HSPA5/ACTB/RUVBL2/YWHAH/LARP1	7
GO:0017038	protein import	5/50	176/10546	0.00141144621252447	0.0195147780688166	0.0141338412494441	HSPA8/HSP90AB1/HSP90AA1/HSPD1/TRIM28	5
GO:0030705	cytoskeleton-dependent intracellular transport	5/50	176/10546	0.00141144621252447	0.0195147780688166	0.0141338412494441	HSPA8/UBB/HSPB1/TUBB/TUBA1C	5
GO:0035795	negative regulation of mitochondrial membrane permeability	2/50	13/10546	0.00166199005476188	0.0225860186929179	0.0163582286991408	SLC25A5/SLC25A6	2
GO:1902036	regulation of hematopoietic stem cell differentiation	2/50	13/10546	0.00166199005476188	0.0225860186929179	0.0163582286991408	HSPA9/PRKDC	2
GO:0034605	cellular response to heat	3/50	51/10546	0.00177945421537496	0.0239773915461541	0.0173659492562017	HSP90AB1/HSP90AA1/YWHAE	3
GO:1904589	regulation of protein import	3/50	52/10546	0.00188213314396883	0.0251478294026088	0.018213654661671	HSPA8/HSP90AB1/TRIM28	3
GO:0061684	chaperone-mediated autophagy	2/50	14/10546	0.00193312390538752	0.0254022066906293	0.0183978908437924	HSPA8/HSP90AA1	2
GO:0072530	purine-containing compound transmembrane transport	2/50	14/10546	0.00193312390538752	0.0254022066906293	0.0183978908437924	SLC25A5/SLC25A6	2
GO:0046824	positive regulation of nucleocytoplasmic transport	3/50	53/10546	0.0019884409615504	0.0259149272857797	0.0187692356508726	HSP90AB1/YWHAE/TRIM28	3
GO:0021954	central nervous system neuron development	3/50	54/10546	0.00209842286827481	0.0271259541508695	0.0196463381933474	HSP90AB1/HSP90AA1/UBB	3
GO:0045911	positive regulation of DNA recombination	3/50	55/10546	0.00221212322394831	0.0280620292361074	0.0203243032004644	ACTB/RUVBL2/RUVBL1	3
GO:1901679	nucleotide transmembrane transport	2/50	15/10546	0.00222378344889907	0.0280620292361074	0.0203243032004644	SLC25A5/SLC25A6	2
GO:1905709	negative regulation of membrane permeability	2/50	15/10546	0.00222378344889907	0.0280620292361074	0.0203243032004644	SLC25A5/SLC25A6	2
GO:0046931	pore complex assembly	2/50	16/10546	0.00253378494054602	0.0314743598083451	0.0227957296460308	CCT3/CCT8	2
GO:0060333	interferon-gamma-mediated signaling pathway	2/50	16/10546	0.00253378494054602	0.0314743598083451	0.0227957296460308	HSP90AB1/CDC37	2
GO:0042255	ribosome assembly	3/50	58/10546	0.00257596614642716	0.0317502804094511	0.0229955688632502	C1QBP/PRKDC/DHX30	3
GO:0060382	regulation of DNA strand elongation	2/50	17/10546	0.00286294587860927	0.0347487324197614	0.0251672381775696	RUVBL2/RUVBL1	2
GO:0070262	peptidyl-serine dephosphorylation	2/50	17/10546	0.00286294587860927	0.0347487324197614	0.0251672381775696	YWHAE/PPP2R1A	2
GO:0010569	regulation of double-strand break repair via homologous recombination	3/50	62/10546	0.00311569573284775	0.0375299713274843	0.0271815879723719	ACTB/RUVBL2/RUVBL1	3
GO:1903362	regulation of cellular protein catabolic process	5/50	213/10546	0.00324655900587333	0.0388122467619443	0.0281102932522787	HSP90AB1/HSP90AA1/UBB/BAG2/CSNK2A1	5
GO:2001020	regulation of response to DNA damage stimulus	5/50	215/10546	0.00337936622730779	0.0400984500105925	0.0290418433045933	PRKDC/ACTB/RUVBL2/RUVBL1/TRIM28	5
GO:0035304	regulation of protein dephosphorylation	3/50	65/10546	0.00356281574667161	0.0418312896413983	0.0302968757813239	HSP90AB1/YWHAE/YWHAB	3
GO:1901028	regulation of mitochondrial outer membrane permeabilization involved in apoptotic signaling pathway	2/50	19/10546	0.00357802225863532	0.0418312896413983	0.0302968757813239	SLC25A5/SLC25A6	2
GO:0043967	histone H4 acetylation	3/50	66/10546	0.00372011440152972	0.0431750503535201	0.0312701126029467	ACTB/RUVBL2/RUVBL1	3
GO:0051897	positive regulation of protein kinase B signaling	3/50	67/10546	0.00388160115183519	0.0446993338359218	0.0323740954760003	HSP90AB1/HSP90AA1/C1QBP	3
GO:0045859	regulation of protein kinase activity	7/50	430/10546	0.00390767761207115	0.0446993338359218	0.0323740954760003	HSP90AB1/HSP90AA1/YWHAG/CDC37/HSPB1/DNAJA1/ACTB	7
GO:1990542	mitochondrial transmembrane transport	3/50	68/10546	0.00404731014521464	0.0459658795063663	0.0332914082621415	HSPD1/SLC25A5/SLC25A6	3
GO:0051503	adenine nucleotide transport	2/50	21/10546	0.00436757716025409	0.0492514020198865	0.0356709922606791	SLC25A5/SLC25A6	2

## Sheet: enrichGO_Normalized_hubs
ID	Description	GeneRatio	BgRatio	pvalue	p.adjust	qvalue	geneID	Count
GO:0002181	cytoplasmic translation	12/48	107/11702	9.61936375811568e-15	7.55120055012081e-12	6.43991089490692e-12	RPL6/RPL18/RPL23/RPS4X/RPL5/RPL14/RPL8/RPL7A/RPL30/RPS13/RPS11/RPS9	12
GO:0006412	translation	16/48	479/11702	3.25947699706544e-11	1.27934472134819e-08	1.09106703691243e-08	ELAVL1/RPL6/ZNF598/MOV10/RPL18/RPL23/RPS4X/RPL5/RPL14/RPL8/MRPL58/RPL7A/RPL30/RPS13/RPS11/RPS9	16
GO:0043043	peptide biosynthetic process	16/48	498/11702	5.82986110929867e-11	1.52548032359982e-08	1.30097953175928e-08	ELAVL1/RPL6/ZNF598/MOV10/RPL18/RPL23/RPS4X/RPL5/RPL14/RPL8/MRPL58/RPL7A/RPL30/RPS13/RPS11/RPS9	16
GO:0042273	ribosomal large subunit biogenesis	4/48	55/11702	7.28890636583497e-05	0.0143044787429511	0.0121993274965027	RPL6/RPL5/RPL14/RPL7A	4
GO:0031397	negative regulation of protein ubiquitination	4/48	72/11702	0.000208925559917975	0.0328013129071221	0.0279740328648068	SIRT7/RPL23/RPL5/DNAJA1	4
GO:1903321	negative regulation of protein modification by small protein conjugation or removal	4/48	81/11702	0.000328867643403724	0.0430268500119872	0.0366947054745208	SIRT7/RPL23/RPL5/DNAJA1	4

## Sheet: enrichDO_Uncorredted_hubs
ID	Description	GeneRatio	BgRatio	pvalue	p.adjust	qvalue	geneID	Count
DOID:3347	osteosarcoma	13/43	213/7271	1.36827946049442e-10	4.37671323128224e-08	2.02419444606523e-08	ESR2/ESR1/JUN/EGFR/XPO1/BMI1/SUMO1/TP53/MDM2/FN1/CTNNB1/NPM1/CDC5L	13
DOID:5683	hereditary breast ovarian cancer	13/43	215/7271	1.53838777900957e-10	4.37671323128224e-08	2.02419444606523e-08	ESR2/ESR1/ELAVL1/EGFR/EGLN3/XPO1/SUMO1/TP53/BRCA1/MYC/MDM2/CDK2/NPM1	13
DOID:184	bone cancer	13/43	238/7271	5.46218850833769e-10	1.03599508708138e-07	4.79139342836639e-08	ESR2/ESR1/JUN/EGFR/XPO1/BMI1/SUMO1/TP53/MDM2/FN1/CTNNB1/NPM1/CDC5L	13
DOID:201	connective tissue cancer	15/43	364/7271	9.8139301611192e-10	1.16823041291342e-07	5.40297110773018e-08	ESR2/ESR1/JUN/EGFR/XPO1/BMI1/SUMO1/TP53/MYC/MCM2/MDM2/FN1/CTNNB1/NPM1/CDC5L	15
DOID:0060100	musculoskeletal system cancer	16/43	430/7271	1.02656451046873e-09	1.16823041291342e-07	5.40297110773018e-08	ESR2/ESR1/JUN/EGFR/XPO1/BMI1/SUMO1/TP53/BRCA1/MYC/MCM2/MDM2/FN1/CTNNB1/NPM1/CDC5L	16
DOID:170	endocrine gland cancer	16/43	490/7271	6.88344937270629e-09	6.5278044884498e-07	3.01905674241504e-07	ESR2/ESR1/NTRK1/JUN/EGFR/CFTR/TP53/BRCA1/MYC/HSP90AA1/MCM2/MDM2/FN1/COPS5/PCLAF/CTNNB1	16
DOID:3963	thyroid carcinoma	11/43	195/7271	1.05865115369577e-08	8.60532152075565e-07	3.97989155524727e-07	ESR2/ESR1/NTRK1/EGFR/TP53/MCM2/MDM2/FN1/COPS5/PCLAF/CTNNB1	11
DOID:1781	thyroid cancer	11/43	208/7271	2.07833866246252e-08	1.47821837367646e-06	6.83664033704775e-07	ESR2/ESR1/NTRK1/EGFR/TP53/MCM2/MDM2/FN1/COPS5/PCLAF/CTNNB1	11
DOID:0050736	autosomal dominant disease	14/43	395/7271	2.8624163849857e-08	1.80968324784096e-06	8.36963855258976e-07	ESR2/ESR1/ELAVL1/EGFR/EGLN3/XPO1/SUMO1/TP53/BRCA1/HTT/MYC/MDM2/CDK2/NPM1	14
DOID:2151	malignant ovarian surface epithelial-stromal neoplasm	12/43	283/7271	4.98774942403926e-08	2.36502451856528e-06	1.09380469825422e-06	ESR2/ESR1/NTRK1/EGFR/BMI1/TP53/BRCA1/MYC/YWHAZ/MCM2/MDM2/CTNNB1	12
DOID:2152	ovary epithelial cancer	12/43	283/7271	4.98774942403926e-08	2.36502451856528e-06	1.09380469825422e-06	ESR2/ESR1/NTRK1/EGFR/BMI1/TP53/BRCA1/MYC/YWHAZ/MCM2/MDM2/CTNNB1	12
DOID:4001	ovarian carcinoma	12/43	283/7271	4.98774942403926e-08	2.36502451856528e-06	1.09380469825422e-06	ESR2/ESR1/NTRK1/EGFR/BMI1/TP53/BRCA1/MYC/YWHAZ/MCM2/MDM2/CTNNB1	12
DOID:2394	ovarian cancer	12/43	309/7271	1.31459804636245e-07	5.75389452600178e-06	2.66112964850698e-06	ESR2/ESR1/NTRK1/EGFR/BMI1/TP53/BRCA1/MYC/YWHAZ/MCM2/MDM2/CTNNB1	12
DOID:3459	breast carcinoma	13/43	378/7271	1.45252571810917e-07	5.90347952574372e-06	2.73031150020522e-06	ESR2/ESR1/TRIM25/EGFR/BMI1/TP53/BRCA1/MYC/HSP90AA1/MCM2/MDM2/CTNNB1/NPM1	13
DOID:219	colon cancer	11/43	277/7271	3.90568673386475e-07	1.48155716771269e-05	6.8520819892364e-06	ELAVL1/JUN/EGFR/TP53/MYC/HSPA8/HSP90AA1/LMNA/MCM2/MDM2/CTNNB1	11
DOID:9256	colorectal cancer	11/43	282/7271	4.67418321101068e-07	1.53093927196673e-05	7.08047022461719e-06	ELAVL1/JUN/EGFR/TP53/MYC/HSPA8/HSP90AA1/LMNA/MCM2/MDM2/CTNNB1	11
DOID:2237	hepatitis	13/43	419/7271	4.79824575793924e-07	1.53093927196673e-05	7.08047022461719e-06	ESR1/JUN/EGFR/XPO1/TP53/MYC/GRB2/MOV10/HSP90AA1/MCM2/MDM2/CTNNB1/NPM1	13
DOID:5672	large intestine cancer	11/43	283/7271	4.84304163363816e-07	1.53093927196673e-05	7.08047022461719e-06	ELAVL1/JUN/EGFR/TP53/MYC/HSPA8/HSP90AA1/LMNA/MCM2/MDM2/CTNNB1	11
DOID:2621	autonomic nervous system neoplasm	12/43	355/7271	5.92633186618779e-07	1.68604141593043e-05	7.7978050870892e-06	APP/NTRK1/ELAVL1/JUN/LRRK2/EGFR/BMI1/TP53/MYC/MDM2/CDK2/CTNNB1	12
DOID:769	neuroblastoma	12/43	355/7271	5.92633186618779e-07	1.68604141593043e-05	7.7978050870892e-06	APP/NTRK1/ELAVL1/JUN/LRRK2/EGFR/BMI1/TP53/MYC/MDM2/CDK2/CTNNB1	12
DOID:10155	intestinal cancer	11/43	295/7271	7.33422910655062e-07	1.98722683887014e-05	9.19076329141681e-06	ELAVL1/JUN/EGFR/TP53/MYC/HSPA8/HSP90AA1/LMNA/MCM2/MDM2/CTNNB1	11
DOID:120	female reproductive organ cancer	13/43	445/7271	9.55794830438732e-07	2.47203299327108e-05	1.14329525172097e-05	ESR2/ESR1/NTRK1/JUN/EGFR/BMI1/TP53/BRCA1/MYC/YWHAZ/MCM2/MDM2/CTNNB1	13
DOID:1192	peripheral nervous system neoplasm	12/43	376/7271	1.09534261129854e-06	2.709782373169e-05	1.25325241567339e-05	APP/NTRK1/ELAVL1/JUN/LRRK2/EGFR/BMI1/TP53/MYC/MDM2/CDK2/CTNNB1	12
DOID:643	progressive multifocal leukoencephalopathy	6/43	62/7271	1.43204540674765e-06	3.39514098516423e-05	1.57022522669699e-05	EGFR/RNF4/SUMO1/TP53/MYC/HSPA8	6
DOID:0060085	organ system benign neoplasm	10/43	256/7271	1.6877409030101e-06	3.84129829525099e-05	1.77656937158958e-05	ESR2/ESR1/EGFR/TP53/BRCA1/LMNA/MCM2/MDM2/YWHAG/CTNNB1	10
DOID:657	adenoma	11/43	325/7271	1.91154676416779e-06	4.18334657235182e-05	1.93476393134392e-05	ESR2/ESR1/ELAVL1/JUN/EGFR/TP53/BRCA1/MYC/MCM2/MDM2/CTNNB1	11
DOID:3713	ovary adenocarcinoma	5/43	38/7271	2.47353661191629e-06	5.2127493784458e-05	2.41085439757923e-05	EGFR/TP53/BRCA1/MCM2/CTNNB1	5
DOID:1520	colon carcinoma	8/43	165/7271	4.37622101892234e-06	8.89310628488147e-05	4.11298967943829e-05	ELAVL1/EGFR/TP53/MYC/LMNA/MCM2/MDM2/CTNNB1	8
DOID:0060086	female reproductive organ benign neoplasm	5/43	44/7271	5.21339466137461e-06	0.000102290398700764	4.7308481500677e-05	ESR2/ESR1/TP53/LMNA/YWHAG	5
DOID:3910	lung adenocarcinoma	8/43	170/7271	5.46554589653409e-06	0.00010366318717093	4.79433850573166e-05	ESR2/ESR1/EGFR/BMI1/TP53/BRCA1/MYC/CTNNB1	8
DOID:3620	central nervous system cancer	7/43	123/7271	6.49454021753947e-06	0.000115989100177737	5.36440200618523e-05	APP/NTRK1/EGFR/TP53/MYC/YWHAZ/YWHAG	7
DOID:0050622	reproductive organ benign neoplasm	5/43	46/7271	6.52311283952124e-06	0.000115989100177737	5.36440200618523e-05	ESR2/ESR1/TP53/LMNA/YWHAG	5
DOID:0060084	cell type benign neoplasm	12/43	456/7271	8.23131866506477e-06	0.000141927888497632	6.56404997214097e-05	ESR2/ESR1/ELAVL1/JUN/EGFR/TP53/BRCA1/MYC/MCM2/MDM2/YWHAG/CTNNB1	12
DOID:1793	pancreatic cancer	10/43	309/7271	9.12575438001905e-06	0.000152722183595025	7.06327738391567e-05	NTRK1/JUN/EGFR/CFTR/TP53/BRCA1/MYC/HSP90AA1/MDM2/CTNNB1	10
DOID:1115	sarcoma	8/43	187/7271	1.10513782890838e-05	0.000178039227125698	8.23417015658579e-05	ELAVL1/EGFR/BMI1/TP53/MYC/MDM2/CTNNB1/NPM1	8
DOID:0060118	thoracic disease	4/43	25/7271	1.225799573193e-05	0.000178039227125698	8.23417015658579e-05	ESR2/ESR1/EGFR/BRCA1	4
DOID:3463	breast disease	4/43	25/7271	1.225799573193e-05	0.000178039227125698	8.23417015658579e-05	ESR2/ESR1/EGFR/BRCA1	4
DOID:4531	mucoepidermoid carcinoma	4/43	25/7271	1.225799573193e-05	0.000178039227125698	8.23417015658579e-05	EGFR/TP53/MDM2/CTNNB1	4
DOID:0060116	sensory system cancer	7/43	136/7271	1.2607738388068e-05	0.000178039227125698	8.23417015658579e-05	NTRK1/TP53/MYC/HSP90AA1/LMNA/MDM2/CDK2	7
DOID:2174	ocular cancer	7/43	136/7271	1.2607738388068e-05	0.000178039227125698	8.23417015658579e-05	NTRK1/TP53/MYC/HSP90AA1/LMNA/MDM2/CDK2	7
DOID:3717	gastric adenocarcinoma	6/43	90/7271	1.28288371039607e-05	0.000178039227125698	8.23417015658579e-05	ESR2/JUN/EGFR/TP53/MYC/CTNNB1	6
DOID:2043	hepatitis B	8/43	193/7271	1.39283241125863e-05	0.000188695629049086	8.72702012066813e-05	ESR1/JUN/XPO1/TP53/MYC/HSP90AA1/CTNNB1/NPM1	8
DOID:3908	non-small cell lung carcinoma	11/43	412/7271	1.87092593263883e-05	0.000245591707383933	0.000113584176941972	ESR2/ESR1/EGFR/BMI1/TP53/BRCA1/MYC/HSP90AA1/MCM2/FN1/CTNNB1	11
DOID:0050904	salivary gland carcinoma	5/43	57/7271	1.89912743846978e-05	0.000245591707383933	0.000113584176941972	NTRK1/EGFR/TP53/MDM2/CTNNB1	5
DOID:8850	salivary gland cancer	5/43	58/7271	2.06923814132165e-05	0.000261643667202671	0.000121008078439863	NTRK1/EGFR/TP53/MDM2/CTNNB1	5
DOID:3737	verrucous carcinoma	3/43	10/7271	2.24652656737443e-05	0.000268175355743931	0.000124028931525267	EGFR/TP53/MDM2	3
DOID:1967	leiomyosarcoma	4/43	29/7271	2.26228771102086e-05	0.000268175355743931	0.000124028931525267	BRCA1/MYC/MDM2/CTNNB1	4
DOID:4230	smooth muscle cancer	4/43	29/7271	2.26228771102086e-05	0.000268175355743931	0.000124028931525267	BRCA1/MYC/MDM2/CTNNB1	4
DOID:8618	oral cavity cancer	5/43	61/7271	2.65162438501632e-05	0.0003079131173621	0.00014240732465179	NTRK1/EGFR/TP53/MDM2/CTNNB1	5
DOID:3969	papillary thyroid carcinoma	6/43	103/7271	2.78292599951425e-05	0.000316696978744722	0.000146469789448119	NTRK1/EGFR/TP53/FN1/COPS5/CTNNB1	6
DOID:4045	muscle cancer	6/43	104/7271	2.94038723727886e-05	0.000328054968237582	0.000151722767661448	EGFR/TP53/BRCA1/MYC/MDM2/CTNNB1	6
DOID:4074	pancreas adenocarcinoma	7/43	156/7271	3.08034642034987e-05	0.000337060983303669	0.000155887976738354	NTRK1/JUN/EGFR/CFTR/TP53/BRCA1/MDM2	7
DOID:768	retinoblastoma	6/43	113/7271	4.7065052225683e-05	0.000495471914330065	0.000229151750222026	NTRK1/TP53/MYC/LMNA/MDM2/CDK2	6
DOID:771	retinal cell cancer	6/43	113/7271	4.7065052225683e-05	0.000495471914330065	0.000229151750222026	NTRK1/TP53/MYC/LMNA/MDM2/CDK2	6
DOID:4905	pancreatic carcinoma	8/43	229/7271	4.78927157964034e-05	0.000495471914330065	0.000229151750222026	NTRK1/JUN/EGFR/CFTR/TP53/BRCA1/MDM2/CTNNB1	8
DOID:4645	retinal cancer	6/43	115/7271	5.19566922560433e-05	0.00052791710524444	0.000244157388421256	NTRK1/TP53/MYC/LMNA/MDM2/CDK2	6
DOID:4866	salivary gland adenoid cystic carcinoma	4/43	40/7271	8.30333240020993e-05	0.0008288765150385	0.000383348679603413	NTRK1/TP53/MDM2/CTNNB1	4
DOID:3905	lung carcinoma	11/43	489/7271	9.0927810801872e-05	0.000892033178383882	0.000412558125235354	ESR2/ESR1/EGFR/BMI1/TP53/BRCA1/MYC/HSP90AA1/MCM2/FN1/CTNNB1	11
DOID:0060095	uterine benign neoplasm	4/43	42/7271	0.000100826000610253	0.000909263666368401	0.000420527086471372	ESR2/ESR1/TP53/YWHAG	4
DOID:13223	uterine fibroid	4/43	42/7271	0.000100826000610253	0.000909263666368401	0.000420527086471372	ESR2/ESR1/TP53/YWHAG	4
DOID:4839	sebaceous adenocarcinoma	2/43	3/7271	0.000102111417893487	0.000909263666368401	0.000420527086471372	EGFR/TP53	2
DOID:4840	sebaceous carcinoma	2/43	3/7271	0.000102111417893487	0.000909263666368401	0.000420527086471372	EGFR/TP53	2
DOID:0050938	breast lobular carcinoma	3/43	16/7271	0.000102272187429838	0.000909263666368401	0.000420527086471372	ESR2/ESR1/HSP90AA1	3
DOID:3457	invasive lobular carcinoma	3/43	16/7271	0.000102272187429838	0.000909263666368401	0.000420527086471372	ESR2/ESR1/HSP90AA1	3
DOID:5223	infertility	7/43	201/7271	0.000153782346294274	0.00134618700063757	0.000622600592284512	ESR2/ESR1/CFTR/TP53/BRCA1/LMNA/HSP90AB1	7
DOID:1307	dementia	6/43	143/7271	0.00017440007212243	0.00148441217142481	0.00068652861503321	APP/ESR2/ESR1/ELAVL1/LRRK2/TP53	6
DOID:10883	herpangina	3/43	19/7271	0.000174790185387455	0.00148441217142481	0.00068652861503321	APP/HSP90AA1/MDM2	3
DOID:127	leiomyoma	5/43	91/7271	0.000181843490186131	0.00152160214582219	0.000703728677190911	ESR2/ESR1/EGFR/TP53/YWHAG	5
DOID:452	pleomorphic adenoma	3/43	20/7271	0.00020478901261966	0.00168876736493603	0.000781041238061249	TP53/BRCA1/MDM2	3
DOID:5517	stomach carcinoma	6/43	148/7271	0.000210451230541134	0.00171066785968436	0.000791170039628323	ESR2/JUN/EGFR/TP53/MYC/CTNNB1	6
DOID:4948	gallbladder carcinoma	4/43	51/7271	0.000216583091414452	0.00173571519739187	0.000802754230594706	ESR2/EGFR/TP53/MYC	4
DOID:3121	gallbladder cancer	4/43	52/7271	0.000233627673084224	0.00184630758312393	0.000853902313904326	ESR2/EGFR/TP53/MYC	4
DOID:5082	liver cirrhosis	7/43	219/7271	0.000261314895552619	0.00203682432286904	0.000942014764068561	EGFR/BMI1/TP53/MCM2/MDM2/FN1/CTNNB1	7
DOID:15	reproductive system disease	9/43	373/7271	0.000266126858341833	0.0020462997621149	0.000946397078029277	ESR2/ESR1/EGFR/CFTR/TP53/BRCA1/LMNA/MDM2/HSP90AB1	9
DOID:5183	hereditary Wilms' tumor	4/43	54/7271	0.000270584876231494	0.0020528372610096	0.00094942061835612	ESR1/TP53/HSP90AA1/CTNNB1	4
DOID:2994	germ cell cancer	9/43	385/7271	0.00033694159069475	0.0025226284882278	0.00116669525863833	JUN/EGFR/XPO1/BMI1/TP53/MYC/HSP90AA1/MDM2/RNF2	9
DOID:687	hepatoblastoma	3/43	25/7271	0.000404740797265045	0.00299087680056897	0.00138325631327767	TP53/MDM2/CTNNB1	3
DOID:0070004	myeloma	8/43	316/7271	0.000445728509261575	0.00325153233038251	0.00150380738617265	JUN/BMI1/TP53/MYC/HSP90AA1/FN1/CTNNB1/NPM1	8
DOID:10283	prostate cancer	9/43	405/7271	0.000489537092613035	0.00352163351542107	0.00162872699815978	ESR1/JUN/EGFR/BMI1/TP53/BRCA1/MYC/MDM2/NPM1	9
DOID:4960	bone marrow cancer	8/43	321/7271	0.000495133007440572	0.00352163351542107	0.00162872699815978	JUN/BMI1/TP53/MYC/HSP90AA1/FN1/CTNNB1/NPM1	8
DOID:4607	biliary tract cancer	6/43	174/7271	0.00050356189513393	0.00353736689297785	0.00163600355793999	ESR2/ESR1/EGFR/BMI1/TP53/MYC	6
DOID:3856	male reproductive organ cancer	9/43	415/7271	0.000585021650435137	0.00405947950119016	0.00187747641346321	ESR1/JUN/EGFR/BMI1/TP53/BRCA1/MYC/MDM2/NPM1	9
DOID:10652	Alzheimer's disease	9/43	420/7271	0.000638242168221786	0.00437541920142405	0.00202359596772919	APP/ESR2/ESR1/NTRK1/LRRK2/CFTR/TP53/HSP90AA1/CTNNB1	9
DOID:1205	hypersensitivity reaction type I disease	5/43	121/7271	0.000682002743944187	0.00455007829236996	0.00210437438366939	APP/ESR1/TP53/BRCA1/NPM1	5
DOID:680	tauopathy	9/43	424/7271	0.00068363909122793	0.00455007829236996	0.00210437438366939	APP/ESR2/ESR1/NTRK1/LRRK2/CFTR/TP53/HSP90AA1/CTNNB1	9
DOID:9538	multiple myeloma	7/43	257/7271	0.000687709548583157	0.00455007829236996	0.00210437438366939	JUN/BMI1/TP53/MYC/HSP90AA1/CTNNB1/NPM1	7
DOID:1614	male breast cancer	2/43	7/7271	0.000704099195023779	0.00455264138600603	0.0021055597937314	ESR1/BRCA1	2
DOID:5828	endometrioid ovary carcinoma	2/43	7/7271	0.000704099195023779	0.00455264138600603	0.0021055597937314	TP53/CTNNB1	2
DOID:8029	sporadic breast cancer	3/43	31/7271	0.000771695608312913	0.00493364945089941	0.00228177294001453	ESR2/TP53/BRCA1	3
DOID:10534	stomach cancer	7/43	264/7271	0.000806678880355068	0.00509538513928714	0.00235657438686853	ESR2/JUN/EGFR/TP53/MYC/MDM2/CTNNB1	7
DOID:574	peripheral nervous system disease	4/43	72/7271	0.000814903422979138	0.00509538513928714	0.00235657438686853	APP/ESR1/NTRK1/LMNA	4
DOID:4236	carcinosarcoma	2/43	8/7271	0.000935275327900148	0.00566140065505515	0.00261835198180333	TP53/MDM2	2
DOID:495	sclerosing hemangioma	2/43	8/7271	0.000935275327900148	0.00566140065505515	0.00261835198180333	TP53/CTNNB1	2
DOID:7400	Nijmegen breakage syndrome	2/43	8/7271	0.000935275327900148	0.00566140065505515	0.00261835198180333	TP53/MYC	2
DOID:2154	nephroblastoma	4/43	75/7271	0.000950471814476572	0.00569282592039126	0.00263288591267748	ESR1/TP53/HSP90AA1/CTNNB1	4
DOID:688	embryonal cancer	8/43	355/7271	0.000962764883697838	0.00570638769608406	0.00263915812417171	JUN/EGFR/XPO1/BMI1/MYC/HSP90AA1/MDM2/RNF2	8
DOID:3565	meningioma	4/43	76/7271	0.000998990966429507	0.0058600604113236	0.00271023051120322	EGFR/TP53/YWHAZ/YWHAG	4
DOID:9261	nasopharynx carcinoma	3/43	34/7271	0.00101471901067109	0.00589158282726376	0.00272480937344546	BMI1/MYC/MDM2	3
DOID:3247	rhabdomyosarcoma	4/43	77/7271	0.00104923025342393	0.00603042438584055	0.00278902247055802	EGFR/TP53/MDM2/CTNNB1	4
DOID:3070	malignant glioma	6/43	202/7271	0.00110351548618171	0.00627900311637394	0.00290398812153082	APP/JUN/TP53/MYC/HSPA8/MDM2	6
DOID:0080015	physical disorder	5/43	135/7271	0.00111902720945152	0.00630422259582093	0.00291565192665846	ESR2/ESR1/EGFR/SUMO1/BRCA1	5
DOID:0050890	synucleinopathy	6/43	203/7271	0.00113214382943363	0.00631558665635033	0.00292090771267706	APP/ESR2/ESR1/LRRK2/TP53/YWHAZ	6
DOID:4606	bile duct cancer	5/43	136/7271	0.0011566869930858	0.00632841249101749	0.00292683955740333	ESR2/ESR1/EGFR/BMI1/TP53	5
DOID:4897	bile duct carcinoma	5/43	136/7271	0.0011566869930858	0.00632841249101749	0.00292683955740333	ESR2/ESR1/EGFR/BMI1/TP53	5
DOID:0060119	pharynx cancer	3/43	36/7271	0.00120082377323725	0.00644593138652825	0.00298119109542515	BMI1/MYC/MDM2	3
DOID:0060262	gallbladder disease	3/43	36/7271	0.00120082377323725	0.00644593138652825	0.00298119109542515	ESR2/ESR1/TP53	3
DOID:4043	skeletal muscle cancer	4/43	81/7271	0.00126805265206141	0.00674319587871908	0.00311867351712102	EGFR/TP53/MDM2/CTNNB1	4
DOID:12704	ataxia telangiectasia	3/43	37/7271	0.00130141555478892	0.00685653195069349	0.00317109053311141	BMI1/TP53/MCM2	3
DOID:0060058	lymphoma	4/43	82/7271	0.00132739049026868	0.00692922191709061	0.00320470905424596	JUN/BMI1/MYC/MDM2	4
DOID:3111	cystadenocarcinoma	3/43	38/7271	0.00140716743768264	0.00721331776613896	0.00333610108507028	EGFR/TP53/BRCA1	3
DOID:3114	serous cystadenocarcinoma	3/43	38/7271	0.00140716743768264	0.00721331776613896	0.00333610108507028	EGFR/TP53/BRCA1	3
DOID:4138	bile duct disease	4/43	84/7271	0.00145185689190187	0.00737595153118004	0.00341131788510778	ESR2/ESR1/CFTR/TP53	4
DOID:13636	Fanconi's anemia	2/43	10/7271	0.00149186517486902	0.0073814894304389	0.00341387911869341	XPO1/HSP90AA1	2
DOID:3314	angiomyolipoma	2/43	10/7271	0.00149186517486902	0.0073814894304389	0.00341387911869341	EGFR/TP53	2
DOID:4233	clear cell sarcoma	2/43	10/7271	0.00149186517486902	0.0073814894304389	0.00341387911869341	EGFR/MYC	2
DOID:9741	biliary tract disease	4/43	85/7271	0.00151705162917811	0.00739371830911365	0.00341953487610473	ESR2/ESR1/CFTR/TP53	4
DOID:16	integumentary system disease	8/43	381/7271	0.00152032520591616	0.00739371830911365	0.00341953487610473	APP/NTRK1/EGFR/TP53/LMNA/MCM2/NEDD8/CTNNB1	8
DOID:154	mixed cell type cancer	2/43	11/7271	0.00181655468333556	0.0086858791161171	0.00401714879110031	TP53/MDM2	2
DOID:3911	progeria	2/43	11/7271	0.00181655468333556	0.0086858791161171	0.00401714879110031	TP53/LMNA	2
DOID:12930	dilated cardiomyopathy	4/43	90/7271	0.00187395984955989	0.00885805054000583	0.00409677668116078	ESR2/ESR1/TP53/LMNA	4
DOID:1319	brain cancer	3/43	42/7271	0.00188369791799772	0.00885805054000583	0.00409677668116078	APP/TP53/MYC	3
DOID:1380	endometrial cancer	4/43	91/7271	0.00195175830286443	0.0091028727404087	0.00421000496735209	BMI1/MYC/MDM2/CTNNB1	4
DOID:363	uterine cancer	4/43	92/7271	0.00203177198783111	0.00939901025264959	0.00434696616994246	BMI1/MYC/MDM2/CTNNB1	4
DOID:11934	head and neck cancer	6/43	228/7271	0.00205326917250331	0.00942185612221279	0.00435753219970992	EGFR/TP53/BRCA1/MYC/YWHAZ/CTNNB1	6
DOID:3382	liposarcoma	2/43	12/7271	0.00217169613206585	0.00950534691650362	0.00439614601632764	JUN/MDM2	2
DOID:3500	gallbladder adenocarcinoma	2/43	12/7271	0.00217169613206585	0.00950534691650362	0.00439614601632764	EGFR/MYC	2
DOID:3939	lipomatous cancer	2/43	12/7271	0.00217169613206585	0.00950534691650362	0.00439614601632764	JUN/MDM2	2
DOID:4305	bone giant cell tumor	2/43	12/7271	0.00217169613206585	0.00950534691650362	0.00439614601632764	TP53/CTNNB1	2
DOID:5688	Werner syndrome	2/43	12/7271	0.00217169613206585	0.00950534691650362	0.00439614601632764	MYC/LMNA	2
DOID:962	neurofibroma	2/43	12/7271	0.00217169613206585	0.00950534691650362	0.00439614601632764	EGFR/TP53	2
DOID:161	keratosis	3/43	45/7271	0.00229985421879764	0.00998944313355618	0.00462003659862926	EGFR/TP53/MCM2	3
DOID:3602	toxic encephalopathy	3/43	46/7271	0.00245022812454026	0.0105619682035107	0.00488482480968951	APP/LRRK2/HTT	3
DOID:12689	acoustic neuroma	2/43	13/7271	0.00255693491681235	0.0107113785171041	0.00495392587045791	ESR1/EGFR	2
DOID:3429	inclusion body myositis	2/43	13/7271	0.00255693491681235	0.0107113785171041	0.00495392587045791	APP/LMNA	2
DOID:0060122	integumentary system cancer	4/43	98/7271	0.00256018888985265	0.0107113785171041	0.00495392587045791	EGFR/TP53/MYC/CTNNB1	4
DOID:4159	skin cancer	4/43	98/7271	0.00256018888985265	0.0107113785171041	0.00495392587045791	EGFR/TP53/MYC/CTNNB1	4
DOID:0050624	gastrointestinal system benign neoplasm	3/43	48/7271	0.00276894981848762	0.0114169017878222	0.00528022467293597	TP53/BRCA1/MDM2	3
DOID:8567	Hodgkin's lymphoma	3/43	48/7271	0.00276894981848762	0.0114169017878222	0.00528022467293597	JUN/BMI1/MDM2	3
DOID:3149	keratoacanthoma	2/43	14/7271	0.00297191939398353	0.0121656268717743	0.00562650396437624	TP53/CTNNB1	2
DOID:263	kidney cancer	8/43	425/7271	0.00302723154023495	0.0123035339028121	0.0056902848500657	ESR1/ELAVL1/EGFR/TP53/MYC/HSP90AA1/MDM2/CTNNB1	8
DOID:2893	cervix carcinoma	4/43	104/7271	0.0031764616172582	0.0127471005615534	0.00589543083967873	JUN/EGFR/TP53/MYC	4
DOID:4766	embryoma	7/43	335/7271	0.00318117448109064	0.0127471005615534	0.00589543083967873	JUN/XPO1/BMI1/MYC/HSP90AA1/MDM2/RNF2	7
DOID:14330	Parkinson's disease	5/43	172/7271	0.0032500966454392	0.0129322027360483	0.00598103909723812	ESR2/ESR1/LRRK2/TP53/YWHAZ	5
DOID:4362	cervical cancer	4/43	105/7271	0.00328819441026998	0.0129929348572474	0.0060091272117507	JUN/EGFR/TP53/MYC	4
DOID:37	skin disease	7/43	339/7271	0.00339897956780045	0.0132236407411952	0.00611582681583351	APP/NTRK1/EGFR/TP53/LMNA/MCM2/NEDD8	7
DOID:11383	cryptorchidism	2/43	15/7271	0.0034163008593246	0.0132236407411952	0.00611582681583351	ESR1/EGFR	2
DOID:3948	adrenocortical carcinoma	2/43	15/7271	0.0034163008593246	0.0132236407411952	0.00611582681583351	ESR2/TP53	2
DOID:12603	acute leukemia	4/43	107/7271	0.00351967160739693	0.0135317104365463	0.00625830655653792	EGFR/BMI1/MYC/CTNNB1	4
DOID:3069	astrocytoma	4/43	108/7271	0.00363947737638578	0.0138984068937148	0.00642790070008085	APP/TP53/MYC/MDM2	4
DOID:8469	influenza	4/43	110/7271	0.0038873754371502	0.0146573402431391	0.00677890123168026	SUMO1/NXF1/TP53/HSPA8	4
DOID:2615	papilloma	2/43	16/7271	0.00388973352673813	0.0146573402431391	0.00677890123168026	EGFR/TP53	2
DOID:870	neuropathy	5/43	180/7271	0.00395038837089165	0.0147879669936668	0.00683931504655757	APP/ESR2/ESR1/TP53/LMNA	5
DOID:3962	follicular thyroid carcinoma	3/43	56/7271	0.00429451909145279	0.0159711200198473	0.00738651374518884	ESR2/ESR1/MCM2	3
DOID:10286	prostate carcinoma	4/43	116/7271	0.00469951888613927	0.0172937798574563	0.00799823321499226	ESR1/EGFR/TP53/MYC	4
DOID:1067	open-angle glaucoma	3/43	58/7271	0.00474135264984741	0.0172937798574563	0.00799823321499226	ESR2/ESR1/TP53	3
DOID:4007	bladder carcinoma	3/43	58/7271	0.00474135264984741	0.0172937798574563	0.00799823321499226	TP53/MYC/MDM2	3
DOID:1107	esophageal carcinoma	4/43	117/7271	0.00484516810109856	0.0175052273463484	0.0080960259672317	EGFR/TP53/MYC/MDM2	4
DOID:1852	intrahepatic cholestasis	2/43	18/7271	0.00492238378807687	0.0175052273463484	0.0080960259672317	ESR2/TP53	2
DOID:200	giant cell tumor	2/43	18/7271	0.00492238378807687	0.0175052273463484	0.0080960259672317	TP53/CTNNB1	2
DOID:660	adrenal cortex cancer	2/43	18/7271	0.00492238378807687	0.0175052273463484	0.0080960259672317	ESR2/TP53	2
DOID:612	primary immunodeficiency disease	5/43	191/7271	0.00508248752056992	0.0179623316720763	0.00830743301825747	XPO1/BMI1/TP53/MYC/HEXIM1	5
DOID:13580	cholestasis	3/43	60/7271	0.00521537219731741	0.0183181900016889	0.00847201461552536	ESR2/ESR1/TP53	3
DOID:1342	congenital hypoplastic anemia	2/43	19/7271	0.00548092421192269	0.0190161333938049	0.00879480778549853	XPO1/HSP90AA1	2
DOID:3246	embryonal rhabdomyosarcoma	2/43	19/7271	0.00548092421192269	0.0190161333938049	0.00879480778549853	TP53/MDM2	2
DOID:3996	urinary system cancer	8/43	484/7271	0.00665906696876401	0.0226271114488482	0.0104648559101138	ESR1/ELAVL1/EGFR/TP53/MYC/HSP90AA1/MDM2/CTNNB1	8
DOID:3702	cervical adenocarcinoma	2/43	21/7271	0.00668076401301668	0.0226271114488482	0.0104648559101138	EGFR/TP53	2
DOID:3953	adrenal gland cancer	2/43	21/7271	0.00668076401301668	0.0226271114488482	0.0104648559101138	ESR2/TP53	2
DOID:5940	malignant peripheral nerve sheath tumor	2/43	21/7271	0.00668076401301668	0.0226271114488482	0.0104648559101138	EGFR/TP53	2
DOID:3068	glioblastoma multiforme	3/43	66/7271	0.0068049898357754	0.022881786466892	0.0105826410447193	APP/MYC/MDM2	3
DOID:48	male reproductive system disease	4/43	129/7271	0.00683638611488865	0.022881786466892	0.0105826410447193	ESR1/EGFR/CFTR/TP53	4
DOID:6741	bilateral breast cancer	2/43	22/7271	0.00732140316791561	0.0243618620031812	0.0112671640011013	TP53/BRCA1	2
DOID:0060036	intrinsic cardiomyopathy	4/43	132/7271	0.00740768653962279	0.0245056607037521	0.011333669736265	ESR2/ESR1/TP53/LMNA	4
DOID:10892	hypospadias	2/43	23/7271	0.00798875298054823	0.0261882756248272	0.012111865518836	ESR2/ESR1	2
DOID:12449	aplastic anemia	3/43	70/7271	0.00800836548105436	0.0261882756248272	0.012111865518836	XPO1/TP53/HSP90AA1	3
DOID:5041	esophageal cancer	4/43	138/7271	0.00864340736640356	0.0279115082502456	0.012908846660922	EGFR/TP53/MYC/MDM2	4
DOID:8692	myeloid leukemia	4/43	138/7271	0.00864340736640356	0.0279115082502456	0.012908846660922	JUN/BMI1/MYC/MDM2	4
DOID:3151	skin squamous cell carcinoma	2/43	24/7271	0.00868249026413616	0.0279115082502456	0.012908846660922	TP53/CTNNB1	2
DOID:3192	neurilemmoma	2/43	25/7271	0.00940229456560322	0.0300556494821811	0.0139004946268528	ESR1/EGFR	2
DOID:1542	head and neck carcinoma	5/43	224/7271	0.00984615307445581	0.031298665359583	0.0144753794096675	EGFR/TP53/BRCA1/MYC/CTNNB1	5
DOID:0002116	pterygium	2/43	26/7271	0.0101478481457494	0.0317259648073156	0.0146730019458494	NTRK1/TP53	2
DOID:10139	conjunctival degeneration	2/43	26/7271	0.0101478481457494	0.0317259648073156	0.0146730019458494	NTRK1/TP53	2
DOID:10526	conjunctival pterygium	2/43	26/7271	0.0101478481457494	0.0317259648073156	0.0146730019458494	NTRK1/TP53	2
DOID:0050700	cardiomyopathy	4/43	146/7271	0.0104918896616067	0.0326223235926459	0.0150875606292877	ESR2/ESR1/TP53/LMNA	4
DOID:0050737	autosomal recessive disease	6/43	321/7271	0.010838079203881	0.0330570598421388	0.0152886226260932	CFTR/BMI1/TP53/MYC/LMNA/MCM2	6
DOID:10159	osteonecrosis	2/43	27/7271	0.010918835959556	0.0330570598421388	0.0152886226260932	TP53/CTNNB1	2
DOID:2001	neuroma	2/43	27/7271	0.010918835959556	0.0330570598421388	0.0152886226260932	ESR1/EGFR	2
DOID:1883	hepatitis C	5/43	230/7271	0.0109613579205934	0.0330570598421388	0.0152886226260932	EGFR/TP53/GRB2/MCM2/MDM2	5
DOID:2871	endometrial carcinoma	3/43	79/7271	0.0111516782052767	0.0330570598421388	0.0152886226260932	BMI1/MYC/MDM2	3
DOID:440	neuromuscular disease	3/43	79/7271	0.0111516782052767	0.0330570598421388	0.0152886226260932	ESR2/ESR1/LMNA	3
DOID:1168	familial hyperlipidemia	3/43	80/7271	0.011538992906197	0.0330570598421388	0.0152886226260932	ESR1/EGFR/FN1	3
DOID:10211	cholelithiasis	2/43	28/7271	0.0117149456366199	0.0330570598421388	0.0152886226260932	ESR2/ESR1	2
DOID:9446	cholangitis	2/43	28/7271	0.0117149456366199	0.0330570598421388	0.0152886226260932	CFTR/TP53	2
DOID:0060112	ovarian benign neoplasm	1/43	2/7271	0.0117936434937683	0.0330570598421388	0.0152886226260932	LMNA	1
DOID:0060117	peritoneal benign neoplasm	1/43	2/7271	0.0117936434937683	0.0330570598421388	0.0152886226260932	EGFR	1
DOID:11156	anhidrosis	1/43	2/7271	0.0117936434937683	0.0330570598421388	0.0152886226260932	NTRK1	1
DOID:1789	benign peritoneal mesothelioma	1/43	2/7271	0.0117936434937683	0.0330570598421388	0.0152886226260932	EGFR	1
DOID:3012	Li-Fraumeni syndrome	1/43	2/7271	0.0117936434937683	0.0330570598421388	0.0152886226260932	MDM2	1
DOID:3269	ovarian cystadenoma	1/43	2/7271	0.0117936434937683	0.0330570598421388	0.0152886226260932	LMNA	1
DOID:3857	large cell medulloblastoma	1/43	2/7271	0.0117936434937683	0.0330570598421388	0.0152886226260932	MYC	1
DOID:5648	choroid plexus carcinoma	1/43	2/7271	0.0117936434937683	0.0330570598421388	0.0152886226260932	TP53	1
DOID:5662	pleomorphic carcinoma	1/43	2/7271	0.0117936434937683	0.0330570598421388	0.0152886226260932	EGFR	1
DOID:5702	pleomorphic liposarcoma	1/43	2/7271	0.0117936434937683	0.0330570598421388	0.0152886226260932	MDM2	1
DOID:6425	eyelid carcinoma	1/43	2/7271	0.0117936434937683	0.0330570598421388	0.0152886226260932	TP53	1
DOID:3193	peripheral nerve sheath neoplasm	2/43	29/7271	0.0125358674617178	0.0349188075445439	0.0161496658701988	EGFR/TP53	2
DOID:299	adenocarcinoma	4/43	154/7271	0.0125805897128849	0.0349188075445439	0.0161496658701988	JUN/EGFR/TP53/BRCA1	4
DOID:1936	atherosclerosis	6/43	332/7271	0.0126609989869041	0.0349714001143126	0.0161739895080532	ESR2/ESR1/ELAVL1/TP53/YWHAZ/FN1	6
DOID:2348	arteriosclerotic cardiovascular disease	6/43	333/7271	0.0128368633132787	0.0352858706534086	0.0163194295871837	ESR2/ESR1/ELAVL1/TP53/YWHAZ/FN1	6
DOID:4450	renal cell carcinoma	6/43	335/7271	0.0131937866939164	0.036092618407877	0.016692543894125	ESR1/ELAVL1/EGFR/TP53/MYC/MDM2	6
DOID:936	brain disease	7/43	440/7271	0.0137102264535443	0.0373259275218504	0.0172629393774167	APP/ESR1/LRRK2/EGFR/HSPA8/MDM2/NPM1	7
DOID:2349	arteriosclerosis	6/43	344/7271	0.0148873573642859	0.0400799579846053	0.0185366561763969	ESR2/ESR1/ELAVL1/TP53/YWHAZ/FN1	6
DOID:0060115	nervous system benign neoplasm	2/43	32/7271	0.0151444480961163	0.0400799579846053	0.0185366561763969	ESR1/EGFR	2
DOID:2706	synovium cancer	2/43	32/7271	0.0151444480961163	0.0400799579846053	0.0185366561763969	EGFR/MDM2	2
DOID:3277	thymus cancer	2/43	32/7271	0.0151444480961163	0.0400799579846053	0.0185366561763969	ESR1/EGFR	2
DOID:5485	synovial sarcoma	2/43	32/7271	0.0151444480961163	0.0400799579846053	0.0185366561763969	EGFR/MDM2	2
DOID:811	lipodystrophy	2/43	32/7271	0.0151444480961163	0.0400799579846053	0.0185366561763969	LMNA/NEDD8	2
DOID:5520	head and neck squamous cell carcinoma	4/43	164/7271	0.0155453630782627	0.0409505166274606	0.0189392825027567	EGFR/TP53/MYC/CTNNB1	4
DOID:3146	lipid metabolism disorder	3/43	90/7271	0.0158407271790576	0.0415362846308007	0.0192101954633247	ESR1/EGFR/FN1	3
DOID:11981	morbid obesity	2/43	33/7271	0.0160615737916253	0.0417307556503872	0.0193001367359112	ESR2/ESR1	2
DOID:13250	diarrhea	2/43	33/7271	0.0160615737916253	0.0417307556503872	0.0193001367359112	EGFR/CFTR	2
DOID:74	hematopoietic system disease	7/43	459/7271	0.0169837412554335	0.0432621725152627	0.0200084046412278	CFTR/XPO1/TP53/MYC/HSP90AA1/CTNNB1/NPM1	7
DOID:4251	conjunctival disease	2/43	34/7271	0.0170020022154349	0.0432621725152627	0.0200084046412278	NTRK1/TP53	2
DOID:0050902	medulloblastoma	1/43	3/7271	0.0176394095317064	0.0432621725152627	0.0200084046412278	MYC	1
DOID:1963	fallopian tube carcinoma	1/43	3/7271	0.0176394095317064	0.0432621725152627	0.0200084046412278	BRCA1	1
DOID:1964	fallopian tube cancer	1/43	3/7271	0.0176394095317064	0.0432621725152627	0.0200084046412278	BRCA1	1
DOID:3540	choroid plexus cancer	1/43	3/7271	0.0176394095317064	0.0432621725152627	0.0200084046412278	TP53	1
DOID:3664	mast cell neoplasm	1/43	3/7271	0.0176394095317064	0.0432621725152627	0.0200084046412278	MYC	1
DOID:4205	cerebellum cancer	1/43	3/7271	0.0176394095317064	0.0432621725152627	0.0200084046412278	MYC	1
DOID:4660	indolent systemic mastocytosis	1/43	3/7271	0.0176394095317064	0.0432621725152627	0.0200084046412278	MYC	1
DOID:4929	tubular adenocarcinoma	1/43	3/7271	0.0176394095317064	0.0432621725152627	0.0200084046412278	EGFR	1
DOID:5522	basaloid squamous cell carcinoma	1/43	3/7271	0.0176394095317064	0.0432621725152627	0.0200084046412278	TP53	1
DOID:5636	cervical adenosquamous carcinoma	1/43	3/7271	0.0176394095317064	0.0432621725152627	0.0200084046412278	EGFR	1
DOID:8566	herpes simplex	1/43	3/7271	0.0176394095317064	0.0432621725152627	0.0200084046412278	HSPA8	1
DOID:5158	pleural cancer	2/43	35/7271	0.0179654391823807	0.0436851918580112	0.0202040476634961	EGFR/TP53	2
DOID:7474	malignant pleural mesothelioma	2/43	35/7271	0.0179654391823807	0.0436851918580112	0.0202040476634961	EGFR/TP53	2
DOID:255	hemangioma	2/43	37/7271	0.0199601745999882	0.0481243192686155	0.0222571081623418	TP53/CTNNB1	2
DOID:349	systemic mastocytosis	2/43	37/7271	0.0199601745999882	0.0481243192686155	0.0222571081623418	CFTR/MYC	2
DOID:4451	renal carcinoma	6/43	370/7271	0.0206299725010823	0.049529343262092	0.0229069203876108	ESR1/ELAVL1/EGFR/TP53/MYC/MDM2	6

## Sheet: enrichDO_Prey_hubs
ID	Description	GeneRatio	BgRatio	pvalue	p.adjust	qvalue	geneID	Count
DOID:3620	central nervous system cancer	7/37	95/4917	5.16057679958309e-06	0.000970205078848769	0.000900328812782099	HSPA5/YWHAG/YWHAE/YWHAZ/YWHAB/YWHAH/YWHAQ	7
DOID:3565	meningioma	6/37	67/4917	8.51057086709447e-06	0.000970205078848769	0.000900328812782099	YWHAG/YWHAE/YWHAZ/YWHAB/YWHAH/YWHAQ	6
DOID:5419	schizophrenia	12/37	435/4917	4.70074869875096e-05	0.0028690884296729	0.00266245048182943	HSPA8/HSP90AA1/HSPA5/YWHAG/HSPD1/TUBB3/YWHAE/YWHAZ/TUBB/YWHAB/ACTB/YWHAH	12
DOID:2468	psychotic disorder	12/37	438/4917	5.03348847311036e-05	0.0028690884296729	0.00266245048182943	HSPA8/HSP90AA1/HSPA5/YWHAG/HSPD1/TUBB3/YWHAE/YWHAZ/TUBB/YWHAB/ACTB/YWHAH	12
DOID:3093	nervous system cancer	11/37	398/4917	0.000105505810098059	0.00481106494047147	0.00446456164835995	HSP90AA1/HSPA5/YWHAG/HSPD1/HSPA9/HSPB1/YWHAE/YWHAZ/YWHAB/YWHAH/YWHAQ	11

## Sheet: enrichPathway_Uncorrected_hubs
ID	Description	GeneRatio	BgRatio	pvalue	p.adjust	qvalue	geneID	Count
R-HSA-8939211	ESR-mediated signaling	10/46	189/10179	8.76166011832093e-09	6.20325536377122e-06	3.43088164633198e-06	ESR2/ESR1/JUN/EGFR/XPO1/MYC/MOV10/HSP90AA1/HSP90AB1/H3C1	10
R-HSA-3108232	SUMO E3 ligases SUMOylate target proteins	9/46	168/10179	4.78527263813619e-08	1.5299460405137e-05	8.46178898410788e-06	ESR1/SUMO2/BMI1/SUMO1/TP53/BRCA1/MDM2/NPM1/RNF2	9
R-HSA-2990846	SUMOylation	9/46	174/10179	6.48282220556652e-08	1.5299460405137e-05	8.46178898410788e-06	ESR1/SUMO2/BMI1/SUMO1/TP53/BRCA1/MDM2/NPM1/RNF2	9
R-HSA-2559580	Oxidative Stress Induced Senescence	7/46	92/10179	1.57128476061443e-07	2.54106410690839e-05	1.40540566126958e-05	JUN/BMI1/TP53/MOV10/MDM2/H3C1/RNF2	7
R-HSA-9006931	Signaling by Nuclear Receptors	10/46	264/10179	2.07897805355507e-07	2.54106410690839e-05	1.40540566126958e-05	ESR2/ESR1/JUN/EGFR/XPO1/MYC/MOV10/HSP90AA1/HSP90AB1/H3C1	10
R-HSA-1257604	PIP3 activates AKT signaling	10/46	265/10179	2.15344415839694e-07	2.54106410690839e-05	1.40540566126958e-05	ESR2/ESR1/JUN/EGFR/BMI1/TP53/GRB2/MOV10/MDM2/RNF2	10
R-HSA-5663202	Diseases of signal transduction by growth factor receptors and second messengers	12/46	429/10179	2.84509527147473e-07	2.87761064600587e-05	1.59154201652421e-05	ESR2/ESR1/EGFR/MYC/GRB2/HSP90AA1/LMNA/MDM2/FN1/CTNNB1/NPM1/SNW1	12
R-HSA-8864260	Transcriptional regulation by the AP-2 (TFAP2) family of transcription factors	5/46	36/10179	5.11793146594504e-07	4.52936934736136e-05	2.5050927701731e-05	ESR1/EGFR/SUMO1/MYC/NPM1	5
R-HSA-2559583	Cellular Senescence	8/46	164/10179	5.93422243352511e-07	4.66825498103975e-05	2.58190730441092e-05	JUN/BMI1/TP53/MOV10/MDM2/H3C1/CDK2/RNF2	8
R-HSA-9006925	Intracellular signaling by second messengers	10/46	305/10179	7.88167234575118e-07	5.57564842772783e-05	3.08376630257918e-05	ESR2/ESR1/JUN/EGFR/BMI1/TP53/GRB2/MOV10/MDM2/RNF2	10
R-HSA-9018519	Estrogen-dependent gene expression	7/46	118/10179	8.66273060805172e-07	5.57564842772783e-05	3.08376630257918e-05	ESR1/JUN/MYC/MOV10/HSP90AA1/HSP90AB1/H3C1	7
R-HSA-3899300	SUMOylation of transcription cofactors	5/46	44/10179	1.43520367833804e-06	8.46770170219443e-05	4.68329621352413e-05	SUMO2/BMI1/SUMO1/NPM1/RNF2	5
R-HSA-3232118	SUMOylation of transcription factors	4/46	20/10179	1.67743832392103e-06	9.13558717950836e-05	5.05268871658803e-05	SUMO2/SUMO1/TP53/MDM2	4
R-HSA-5688426	Deubiquitination	9/46	268/10179	2.49457101625838e-06	0.000118751422249625	6.56787527161174e-05	ESR1/TRIM25/CFTR/TP53/BRCA1/MYC/MDM2/TNIP2/NEDD8	9
R-HSA-9613829	Chaperone Mediated Autophagy	4/46	22/10179	2.51591996291579e-06	0.000118751422249625	6.56787527161174e-05	CFTR/HSPA8/HSP90AA1/HSP90AB1	4
R-HSA-157118	Signaling by NOTCH	8/46	203/10179	2.96791417885223e-06	0.000131330202414211	7.26357943771729e-05	JUN/EGFR/TP53/MYC/MOV10/YWHAZ/H3C1/SNW1	8
R-HSA-449147	Signaling by Interleukins	11/46	456/10179	4.15548421386054e-06	0.000169445082151861	9.37162809403694e-05	APP/JUN/TP53/MYC/GRB2/HSPA8/HSP90AA1/YWHAZ/TNIP2/FN1/H3C1	11
R-HSA-9734009	Defective Intrinsic Pathway for Apoptosis	4/46	25/10179	4.30792581742021e-06	0.000169445082151861	9.37162809403694e-05	APP/JUN/TP53/LMNA	4
R-HSA-1912408	Pre-NOTCH Transcription and Translation	5/46	61/10179	7.42533957577541e-06	0.000276691601034157	0.000153031929207116	JUN/TP53/MOV10/H3C1/SNW1	5
R-HSA-73894	DNA Repair	9/46	312/10179	8.62884596382335e-06	0.000305461147119346	0.00016894372097591	TRIM25/SUMO2/RNF4/SUMO1/TP53/BRCA1/COPS5/PCLAF/CDK2	9
R-HSA-9645723	Diseases of programmed cell death	5/46	71/10179	1.57135242178674e-05	0.00052977024505953	0.000293004060603844	APP/JUN/TP53/LMNA/H3C1	5
R-HSA-9009391	Extra-nuclear estrogen signaling	5/46	75/10179	2.05519695701099e-05	0.000661399747983536	0.000365805391391429	ESR2/ESR1/EGFR/XPO1/HSP90AA1	5
R-HSA-3108214	SUMOylation of DNA damage response and repair proteins	5/46	76/10179	2.19254920645987e-05	0.00067492384268417	0.000373285265356097	SUMO2/BMI1/SUMO1/BRCA1/RNF2	5
R-HSA-1912422	Pre-NOTCH Expression and Processing	5/46	77/10179	2.33694376662978e-05	0.000677825156861735	0.000374889917265188	JUN/TP53/MOV10/H3C1/SNW1	5
R-HSA-3371568	Attenuation phase	3/46	13/10179	2.39345041264737e-05	0.000677825156861735	0.000374889917265188	HSPA8/HSP90AA1/HSP90AB1	3
R-HSA-69620	Cell Cycle Checkpoints	8/46	273/10179	2.60222377144768e-05	0.000701309160334494	0.000387878393762164	XPO1/TP53/BRCA1/YWHAZ/MCM2/MDM2/YWHAG/CDK2	8
R-HSA-5689896	Ovarian tumor domain proteases	4/46	39/10179	2.67448408602138e-05	0.000701309160334494	0.000387878393762164	ESR1/TRIM25/TP53/TNIP2	4
R-HSA-3700989	Transcriptional Regulation by TP53	9/46	362/10179	2.82828926836957e-05	0.000715153143573448	0.000395535190914842	JUN/TP53/BRCA1/MOV10/YWHAZ/MDM2/YWHAG/CDK2/NPM1	9
R-HSA-5637810	Constitutive Signaling by EGFRvIII	3/46	15/10179	3.78369894868038e-05	0.000892952951888569	0.000493872283827755	EGFR/GRB2/HSP90AA1	3
R-HSA-5637812	Signaling by EGFRvIII in Cancer	3/46	15/10179	3.78369894868038e-05	0.000892952951888569	0.000493872283827755	EGFR/GRB2/HSP90AA1	3
R-HSA-8856828	Clathrin-mediated endocytosis	6/46	145/10179	4.41295917455022e-05	0.000995946917859467	0.00055083594029694	EGFR/CFTR/GRB2/HSPA8/COPS5/NEDD8	6
R-HSA-4655427	SUMOylation of DNA methylation proteins	3/46	16/10179	4.64212546459921e-05	0.000995946917859467	0.00055083594029694	BMI1/SUMO1/RNF2	3
R-HSA-9665348	Signaling by ERBB2 ECD mutants	3/46	16/10179	4.64212546459921e-05	0.000995946917859467	0.00055083594029694	EGFR/GRB2/HSP90AA1	3
R-HSA-5693532	DNA Double-Strand Break Repair	6/46	149/10179	5.14047018786507e-05	0.0010197103385882	0.000563978956221839	SUMO2/RNF4/SUMO1/TP53/BRCA1/CDK2	6
R-HSA-69481	G2/M Checkpoints	6/46	149/10179	5.14047018786507e-05	0.0010197103385882	0.000563978956221839	TP53/BRCA1/YWHAZ/MCM2/YWHAG/CDK2	6
R-HSA-4570464	SUMOylation of RNA binding proteins	4/46	46/10179	5.18496782332981e-05	0.0010197103385882	0.000563978956221839	SUMO2/BMI1/SUMO1/RNF2	4
R-HSA-8878159	Transcriptional regulation by RUNX3	5/46	96/10179	6.78265941226059e-05	0.00129787104429203	0.000717823414327436	TP53/MYC/MDM2/CTNNB1/SNW1	5
R-HSA-1236382	Constitutive Signaling by Ligand-Responsive EGFR Cancer Variants	3/46	19/10179	7.95654935365708e-05	0.00144441972881775	0.000798876210407675	EGFR/GRB2/HSP90AA1	3
R-HSA-5637815	Signaling by Ligand-Responsive EGFR Variants in Cancer	3/46	19/10179	7.95654935365708e-05	0.00144441972881775	0.000798876210407675	EGFR/GRB2/HSP90AA1	3
R-HSA-5683057	MAPK family signaling cascades	8/46	321/10179	8.21606882660747e-05	0.00145424418230952	0.000804309895657363	JUN/EGFR/XPO1/CUL3/MYC/GRB2/MOV10/FN1	8
R-HSA-2219528	PI3K/AKT Signaling in Cancer	5/46	103/10179	9.48833532011304e-05	0.00163847351381464	0.000906203013884993	ESR2/ESR1/EGFR/GRB2/MDM2	5
R-HSA-72203	Processing of Capped Intron-Containing Pre-mRNA	7/46	243/10179	9.80004673643175e-05	0.00165200787842707	0.000913688567907923	ELAVL1/HNRNPL/EFTUD2/NXF1/HSPA8/SNW1/CDC5L	7
R-HSA-8856825	Cargo recognition for clathrin-mediated endocytosis	5/46	105/10179	0.000103958611285346	0.00171169062302383	0.000946697757604618	EGFR/CFTR/GRB2/COPS5/NEDD8	5
R-HSA-6785807	Interleukin-4 and Interleukin-13 signaling	5/46	107/10179	0.000113687232784828	0.00182933092753768	0.00101176197597981	TP53/MYC/HSPA8/HSP90AA1/FN1	5
R-HSA-4551638	SUMOylation of chromatin organization proteins	4/46	57/10179	0.000121036583647517	0.00184751324683229	0.00102181820966638	SUMO2/BMI1/SUMO1/RNF2	4
R-HSA-8862803	Deregulated CDK5 triggers multiple neurodegenerative pathways in Alzheimer's disease models	3/46	22/10179	0.00012525513537846	0.00184751324683229	0.00102181820966638	APP/JUN/LMNA	3
R-HSA-8863678	Neurodegenerative Diseases	3/46	22/10179	0.00012525513537846	0.00184751324683229	0.00102181820966638	APP/JUN/LMNA	3
R-HSA-9665686	Signaling by ERBB2 TMD/JMD mutants	3/46	22/10179	0.00012525513537846	0.00184751324683229	0.00102181820966638	EGFR/GRB2/HSP90AA1	3
R-HSA-3371571	HSF1-dependent transactivation	3/46	23/10179	0.000143588074603322	0.00203320713638303	0.00112452134215654	HSPA8/HSP90AA1/HSP90AB1	3
R-HSA-9013418	RHOBTB2 GTPase cycle	3/46	23/10179	0.000143588074603322	0.00203320713638303	0.00112452134215654	CUL3/HSP90AA1/HSP90AB1	3
R-HSA-8943724	Regulation of PTEN gene transcription	4/46	60/10179	0.000147947597184411	0.002053860760913	0.00113594439943449	JUN/BMI1/TP53/RNF2	4
R-HSA-72163	mRNA Splicing - Major Pathway	6/46	183/10179	0.000160313177188178	0.00218272556633134	0.00120721663793526	ELAVL1/HNRNPL/EFTUD2/HSPA8/SNW1/CDC5L	6
R-HSA-1643713	Signaling by EGFR in Cancer	3/46	25/10179	0.000185301186061645	0.0024295044394749	0.00134370450711368	EGFR/GRB2/HSP90AA1	3
R-HSA-9664565	Signaling by ERBB2 KD Mutants	3/46	25/10179	0.000185301186061645	0.0024295044394749	0.00134370450711368	EGFR/GRB2/HSP90AA1	3
R-HSA-3065676	SUMO is conjugated to E1 (UBA2:SAE1)	2/46	5/10179	0.000198081138696837	0.00254984447631564	0.00141026188698992	SUMO2/SUMO1	2
R-HSA-72172	mRNA Splicing	6/46	191/10179	0.000202411031804512	0.00255905375924276	0.00141535533517441	ELAVL1/HNRNPL/EFTUD2/HSPA8/SNW1/CDC5L	6
R-HSA-1227990	Signaling by ERBB2 in Cancer	3/46	26/10179	0.000208809028603835	0.00259362793423711	0.00143447753722302	EGFR/GRB2/HSP90AA1	3
R-HSA-69275	G2/M Transition	6/46	193/10179	0.000214190751626426	0.00261460434743982	0.00144607912168839	XPO1/TP53/HSP90AA1/YWHAG/HSP90AB1/CDK2	6
R-HSA-9679506	SARS-CoV Infections	8/46	370/10179	0.000219556059788616	0.00263467271746339	0.00145717848780313	TRIM25/CUL3/SUMO1/GRB2/HSP90AA1/YWHAZ/YWHAG/HSP90AB1	8
R-HSA-453274	Mitotic G2-G2/M phases	6/46	195/10179	0.000226506117359195	0.0026727721848385	0.00147825045013369	XPO1/TP53/HSP90AA1/YWHAG/HSP90AB1/CDK2	6
R-HSA-201681	TCF dependent signaling in response to WNT	6/46	200/10179	0.000259752375203114	0.00301483084661975	0.00166743543702431	XPO1/CUL3/MYC/YWHAZ/H3C1/CTNNB1	6
R-HSA-195258	RHO GTPase Effectors	7/46	288/10179	0.00028024895163889	0.00320026222194087	0.00176999337877193	CFTR/XPO1/GRB2/YWHAZ/YWHAG/H3C1/CTNNB1	7
R-HSA-3065679	SUMO is proteolytically processed	2/46	6/10179	0.000296266049373606	0.00322702096856174	0.00178479304238027	SUMO2/SUMO1	2
R-HSA-5336415	Uptake and function of diphtheria toxin	2/46	6/10179	0.000296266049373606	0.00322702096856174	0.00178479304238027	HSP90AA1/HSP90AB1	2
R-HSA-8857538	PTK6 promotes HIF1A stabilization	2/46	6/10179	0.000296266049373606	0.00322702096856174	0.00178479304238027	LRRK2/EGFR	2
R-HSA-5357801	Programmed Cell Death	6/46	208/10179	0.000320837548136545	0.00335220418352975	0.00185402907563644	TP53/HSP90AA1/YWHAZ/LMNA/YWHAG/CTNNB1	6
R-HSA-114452	Activation of BH3-only proteins	3/46	30/10179	0.000321963113672349	0.00335220418352975	0.00185402907563644	TP53/YWHAZ/YWHAG	3
R-HSA-4090294	SUMOylation of intracellular receptors	3/46	30/10179	0.000321963113672349	0.00335220418352975	0.00185402907563644	ESR1/SUMO2/SUMO1	3
R-HSA-195721	Signaling by WNT	7/46	297/10179	0.000337931223572365	0.00346746820709036	0.00191777902622303	XPO1/CUL3/MYC/MOV10/YWHAZ/H3C1/CTNNB1	7
R-HSA-69473	G2/M DNA damage checkpoint	4/46	76/10179	0.000369263168587606	0.0037348331908575	0.00206565261224946	TP53/BRCA1/YWHAZ/YWHAG	4
R-HSA-6807070	PTEN Regulation	5/46	139/10179	0.000386187063203644	0.00381745978905078	0.00211135153364093	JUN/BMI1/TP53/MOV10/RNF2	5
R-HSA-2219530	Constitutive Signaling by Aberrant PI3K in Cancer	4/46	77/10179	0.000388216249733978	0.00381745978905078	0.00211135153364093	ESR2/ESR1/EGFR/GRB2	4
R-HSA-3065678	SUMO is transferred from E1 to E2 (UBE2I, UBC9)	2/46	7/10179	0.000413578341941581	0.00401114337115944	0.00221847358618988	SUMO2/SUMO1	2
R-HSA-5693607	Processing of DNA double-strand break ends	4/46	79/10179	0.000428195811680933	0.0040458201953006	0.0022376525611832	SUMO2/RNF4/BRCA1/CDK2	4
R-HSA-2559585	Oncogene Induced Senescence	3/46	33/10179	0.000428582647807267	0.0040458201953006	0.0022376525611832	TP53/MOV10/MDM2	3
R-HSA-168928	DDX58/IFIH1-mediated induction of interferon-alpha/beta	4/46	80/10179	0.000449250895606134	0.00418512676433083	0.00231469990533909	APP/TRIM25/HSP90AA1/HSP90AB1	4
R-HSA-8953750	Transcriptional Regulation by E2F6	3/46	34/10179	0.000468574774501726	0.00430845377074314	0.00238290931120495	BMI1/BRCA1/RNF2	3
R-HSA-9706574	RHOBTB GTPase Cycle	3/46	35/10179	0.000510886306572611	0.00463727570581293	0.00256477336093133	CUL3/HSP90AA1/HSP90AB1	3
R-HSA-4411364	Binding of TCF/LEF:CTNNB1 to target gene promoters	2/46	8/10179	0.000549850662919085	0.00479688949325719	0.00265305217289872	MYC/CTNNB1	2
R-HSA-450520	HuR (ELAVL1) binds and stabilizes mRNA	2/46	8/10179	0.000549850662919085	0.00479688949325719	0.00265305217289872	ELAVL1/XPO1	2
R-HSA-8951430	RUNX3 regulates WNT signaling	2/46	8/10179	0.000549850662919085	0.00479688949325719	0.00265305217289872	MYC/CTNNB1	2
R-HSA-6804757	Regulation of TP53 Degradation	3/46	36/10179	0.000555571946959167	0.00479688949325719	0.00265305217289872	TP53/MDM2/CDK2	3
R-HSA-1500620	Meiosis	4/46	86/10179	0.000591403910478337	0.0050447466098634	0.00279013639439367	BRCA1/LMNA/H3C1/CDK2	4
R-HSA-6806003	Regulation of TP53 Expression and Degradation	3/46	37/10179	0.000602685571668621	0.00507977838977838	0.00280951168747778	TP53/MDM2/CDK2	3
R-HSA-450531	Regulation of mRNA stability by proteins that bind AU-rich elements	4/46	87/10179	0.000617868672506715	0.00508663976900877	0.00281330656269888	ELAVL1/XPO1/HSPA8/YWHAZ	4
R-HSA-5628897	TP53 Regulates Metabolic Genes	4/46	87/10179	0.000617868672506715	0.00508663976900877	0.00281330656269888	TP53/MOV10/YWHAZ/YWHAG	4
R-HSA-5687128	MAPK6/MAPK4 signaling	4/46	89/10179	0.000673306157004061	0.00547931907079167	0.00303048869214169	JUN/XPO1/MYC/MOV10	4
R-HSA-8853884	Transcriptional Regulation by VENTX	3/46	39/10179	0.000704408186669553	0.00560765214210167	0.00310146684041306	TP53/MOV10/CTNNB1	3
R-HSA-2179392	EGFR Transactivation by Gastrin	2/46	9/10179	0.000704916724077752	0.00560765214210167	0.00310146684041306	EGFR/GRB2	2
R-HSA-6804756	Regulation of TP53 Activity through Phosphorylation	4/46	92/10179	0.000762952665238479	0.00600189429987604	0.00331951335051128	TP53/BRCA1/MDM2/CDK2	4
R-HSA-170834	Signaling by TGF-beta Receptor Complex	4/46	93/10179	0.000794624504168457	0.00618235328517877	0.00341932117467514	XPO1/MYC/NEDD8/SNW1	4
R-HSA-168142	Toll Like Receptor 10 (TLR10) Cascade	4/46	95/10179	0.000860741304089695	0.00647975831217334	0.00358380923599239	APP/JUN/TP53/TNIP2	4
R-HSA-168176	Toll Like Receptor 5 (TLR5) Cascade	4/46	95/10179	0.000860741304089695	0.00647975831217334	0.00358380923599239	APP/JUN/TP53/TNIP2	4
R-HSA-975871	MyD88 cascade initiated on plasma membrane	4/46	95/10179	0.000860741304089695	0.00647975831217334	0.00358380923599239	APP/JUN/TP53/TNIP2	4
R-HSA-3769402	Deactivation of the beta-catenin transactivating complex	3/46	42/10179	0.000876502140074912	0.00647975831217334	0.00358380923599239	XPO1/YWHAZ/CTNNB1	3
R-HSA-3215018	Processing and activation of SUMO	2/46	10/10179	0.000878611296565877	0.00647975831217334	0.00358380923599239	SUMO2/SUMO1	2
R-HSA-9679191	Potential therapeutics for SARS	4/46	97/10179	0.000930654258117895	0.00679281664688113	0.00375695479131695	CUL3/GRB2/HSP90AA1/HSP90AB1	4
R-HSA-975138	TRAF6 mediated induction of NFkB and MAP kinases upon TLR7/8 or 9 activation	4/46	100/10179	0.00104290080321406	0.00753442621097507	0.00416712243604331	APP/JUN/TP53/TNIP2	4
R-HSA-9614399	Regulation of localization of FOXO transcription factors	2/46	11/10179	0.00107077020506144	0.00758105305183502	0.00419291069771428	YWHAZ/YWHAG	2
R-HSA-9634285	Constitutive Signaling by Overexpressed ERBB2	2/46	11/10179	0.00107077020506144	0.00758105305183502	0.00419291069771428	GRB2/HSP90AA1	2
R-HSA-975155	MyD88 dependent cascade initiated on endosome	4/46	101/10179	0.00108234287316226	0.00758711637820675	0.00419626418776823	APP/JUN/TP53/TNIP2	4
R-HSA-168181	Toll Like Receptor 7/8 (TLR7/8) Cascade	4/46	102/10179	0.00112282294696822	0.00779371222013233	0.00431052772210709	APP/JUN/TP53/TNIP2	4
R-HSA-168164	Toll Like Receptor 3 (TLR3) Cascade	4/46	103/10179	0.0011643558598477	0.00800353348322493	0.00442657516467392	APP/JUN/TP53/TNIP2	4
R-HSA-109581	Apoptosis	5/46	179/10179	0.00121575813328411	0.00826500453352161	0.00457118894806726	TP53/YWHAZ/LMNA/YWHAG/CTNNB1	5
R-HSA-168138	Toll Like Receptor 9 (TLR9) Cascade	4/46	105/10179	0.00125063952641659	0.00826500453352161	0.00457118894806726	APP/JUN/TP53/TNIP2	4
R-HSA-6811558	PI5P, PP2A and IER3 Regulate PI3K/AKT Signaling	4/46	105/10179	0.00125063952641659	0.00826500453352161	0.00457118894806726	ESR2/ESR1/EGFR/GRB2	4
R-HSA-3371511	HSF1 activation	2/46	12/10179	0.00128123032195464	0.00826500453352161	0.00457118894806726	HSP90AA1/HSP90AB1	2
R-HSA-9700645	ALK mutants bind TKIs	2/46	12/10179	0.00128123032195464	0.00826500453352161	0.00457118894806726	FN1/NPM1	2
R-HSA-9755779	SARS-CoV-2 targets host intracellular signalling and regulatory pathways	2/46	12/10179	0.00128123032195464	0.00826500453352161	0.00457118894806726	YWHAZ/YWHAG	2
R-HSA-1474165	Reproduction	4/46	106/10179	0.00129541992768484	0.00826500453352161	0.00457118894806726	BRCA1/LMNA/H3C1/CDK2	4
R-HSA-6791312	TP53 Regulates Transcription of Cell Cycle Genes	3/46	48/10179	0.00129578460906907	0.00826500453352161	0.00457118894806726	TP53/CDK2/NPM1	3
R-HSA-166166	MyD88-independent TLR4 cascade	4/46	107/10179	0.00134131245952561	0.00840397541012508	0.0046480506282583	APP/JUN/TP53/TNIP2	4
R-HSA-937061	TRIF(TICAM1)-mediated TLR4 signaling	4/46	107/10179	0.00134131245952561	0.00840397541012508	0.0046480506282583	APP/JUN/TP53/TNIP2	4
R-HSA-1227986	Signaling by ERBB2	3/46	50/10179	0.00145916187285671	0.00906216321037326	0.00501207956327513	EGFR/GRB2/HSP90AA1	3
R-HSA-179812	GRB2 events in EGFR signaling	2/46	13/10179	0.00150982956155976	0.00913640452636163	0.00505314077283159	EGFR/GRB2	2
R-HSA-75035	Chk1/Chk2(Cds1) mediated inactivation of Cyclin B:Cdk1 complex	2/46	13/10179	0.00150982956155976	0.00913640452636163	0.00505314077283159	YWHAZ/YWHAG	2
R-HSA-8866910	TFAP2 (AP-2) family regulates transcription of growth factors and their receptors	2/46	13/10179	0.00150982956155976	0.00913640452636163	0.00505314077283159	ESR1/EGFR	2
R-HSA-166058	MyD88:MAL(TIRAP) cascade initiated on plasma membrane	4/46	111/10179	0.00153629972746638	0.00914033787433777	0.00505531621952669	APP/JUN/TP53/TNIP2	4
R-HSA-168188	Toll Like Receptor TLR6:TLR2 Cascade	4/46	111/10179	0.00153629972746638	0.00914033787433777	0.00505531621952669	APP/JUN/TP53/TNIP2	4
R-HSA-199418	Negative regulation of the PI3K/AKT network	4/46	112/10179	0.00158797466373067	0.00936905051601093	0.0051818120605948	ESR2/ESR1/EGFR/GRB2	4
R-HSA-3371497	HSP90 chaperone cycle for steroid hormone receptors (SHR) in the presence of ligand	3/46	52/10179	0.00163493590047931	0.00944489453634631	0.00522375969003989	HSPA8/HSP90AA1/HSP90AB1	3
R-HSA-9694516	SARS-CoV-2 Infection	6/46	284/10179	0.00163946188000814	0.00944489453634631	0.00522375969003989	TRIM25/SUMO1/HSP90AA1/YWHAZ/YWHAG/HSP90AB1	6
R-HSA-5693567	HDR through Homologous Recombination (HRR) or Single Strand Annealing (SSA)	4/46	113/10179	0.00164085032199237	0.00944489453634631	0.00522375969003989	SUMO2/RNF4/BRCA1/CDK2	4
R-HSA-168179	Toll Like Receptor TLR1:TLR2 Cascade	4/46	114/10179	0.00169494140504507	0.00960014811817525	0.00530962696990959	APP/JUN/TP53/TNIP2	4
R-HSA-181438	Toll Like Receptor 2 (TLR2) Cascade	4/46	114/10179	0.00169494140504507	0.00960014811817525	0.00530962696990959	APP/JUN/TP53/TNIP2	4
R-HSA-180336	SHC1 events in EGFR signaling	2/46	14/10179	0.00175640687435633	0.00979162257515184	0.0054155272048119	EGFR/GRB2	2
R-HSA-6804116	TP53 Regulates Transcription of Genes Involved in G1 Cell Cycle Arrest	2/46	14/10179	0.00175640687435633	0.00979162257515184	0.0054155272048119	TP53/CDK2	2
R-HSA-8848021	Signaling by PTK6	3/46	54/10179	0.00182344231990686	0.00993074740380043	0.005492474032432	LRRK2/EGFR/CDK2	3
R-HSA-9006927	Signaling by Non-Receptor Tyrosine Kinases	3/46	54/10179	0.00182344231990686	0.00993074740380043	0.005492474032432	LRRK2/EGFR/CDK2	3
R-HSA-912446	Meiotic recombination	3/46	54/10179	0.00182344231990686	0.00993074740380043	0.005492474032432	BRCA1/H3C1/CDK2	3
R-HSA-109606	Intrinsic Pathway for Apoptosis	3/46	55/10179	0.0019225719446282	0.0102344431338103	0.00566044134073361	TP53/YWHAZ/YWHAG	3
R-HSA-9700206	Signaling by ALK in cancer	3/46	55/10179	0.0019225719446282	0.0102344431338103	0.00566044134073361	GRB2/FN1/NPM1	3
R-HSA-9725370	Signaling by ALK fusions and activated point mutants	3/46	55/10179	0.0019225719446282	0.0102344431338103	0.00566044134073361	GRB2/FN1/NPM1	3
R-HSA-9705683	SARS-CoV-2-host interactions	5/46	199/10179	0.001941871982637	0.0102600400276641	0.00567459840959123	TRIM25/HSP90AA1/YWHAZ/YWHAG/HSP90AB1	5
R-HSA-5693538	Homology Directed Repair	4/46	119/10179	0.00198414114483268	0.0104057180040114	0.00575516963647373	SUMO2/RNF4/BRCA1/CDK2	4
R-HSA-111447	Activation of BAD and translocation to mitochondria	2/46	15/10179	0.00202080224125934	0.0104432699767271	0.00577593879176699	YWHAZ/YWHAG	2
R-HSA-354194	GRB2:SOS provides linkage to MAPK signaling for Integrins	2/46	15/10179	0.00202080224125934	0.0104432699767271	0.00577593879176699	GRB2/FN1	2
R-HSA-9006936	Signaling by TGFB family members	4/46	122/10179	0.00217318163374174	0.011149366642675	0.00616646504768823	XPO1/MYC/NEDD8/SNW1	4
R-HSA-1236394	Signaling by ERBB4	3/46	58/10179	0.00223993818084251	0.0112442932474912	0.00621896682733677	ESR1/EGFR/GRB2	3
R-HSA-9616222	Transcriptional regulation of granulopoiesis	3/46	58/10179	0.00223993818084251	0.0112442932474912	0.00621896682733677	MYC/H3C1/CDK2	3
R-HSA-8878171	Transcriptional regulation by RUNX1	5/46	206/10179	0.00225871673903566	0.0112442932474912	0.00621896682733677	ESR1/BMI1/MOV10/H3C1/RNF2	5
R-HSA-1963640	GRB2 events in ERBB2 signaling	2/46	16/10179	0.00230285666791839	0.0112442932474912	0.00621896682733677	EGFR/GRB2	2
R-HSA-1963642	PI3K events in ERBB2 signaling	2/46	16/10179	0.00230285666791839	0.0112442932474912	0.00621896682733677	EGFR/GRB2	2
R-HSA-399954	Sema3A PAK dependent Axon repulsion	2/46	16/10179	0.00230285666791839	0.0112442932474912	0.00621896682733677	HSP90AA1/HSP90AB1	2
R-HSA-844456	The NLRP3 inflammasome	2/46	16/10179	0.00230285666791839	0.0112442932474912	0.00621896682733677	APP/HSP90AB1	2
R-HSA-201722	Formation of the beta-catenin:TCF transactivating complex	3/46	59/10179	0.00235251306190035	0.0113304710736425	0.00626662985339729	MYC/H3C1/CTNNB1	3
R-HSA-5693565	Recruitment and ATM-mediated phosphorylation of repair and signaling proteins at DNA double strand breaks	3/46	59/10179	0.00235251306190035	0.0113304710736425	0.00626662985339729	SUMO1/TP53/BRCA1	3
R-HSA-5693606	DNA Double Strand Break Response	3/46	60/10179	0.00246854282320119	0.0118089751272057	0.00653127973137158	SUMO1/TP53/BRCA1	3
R-HSA-2029482	Regulation of actin dynamics for phagocytic cup formation	3/46	61/10179	0.00258806354811274	0.0122833854850958	0.00679366547792989	GRB2/HSP90AA1/HSP90AB1	3
R-HSA-180292	GAB1 signalosome	2/46	17/10179	0.00260241217904572	0.0122833854850958	0.00679366547792989	EGFR/GRB2	2
R-HSA-5625740	RHO GTPases activate PKNs	3/46	62/10179	0.00271111065917259	0.0126280680703566	0.00698430169814547	YWHAZ/YWHAG/H3C1	3
R-HSA-6796648	TP53 Regulates Transcription of DNA Repair Genes	3/46	62/10179	0.00271111065917259	0.0126280680703566	0.00698430169814547	JUN/TP53/BRCA1	3
R-HSA-881907	Gastrin-CREB signalling pathway via PKC and MAPK	2/46	18/10179	0.0029193118127729	0.0135089723100863	0.00747151010905757	EGFR/GRB2	2
R-HSA-69563	p53-Dependent G1 DNA Damage Response	3/46	66/10179	0.00323924862449075	0.0146713817034744	0.00811441271735427	TP53/MDM2/CDK2	3
R-HSA-69580	p53-Dependent G1/S DNA damage checkpoint	3/46	66/10179	0.00323924862449075	0.0146713817034744	0.00811441271735427	TP53/MDM2/CDK2	3
R-HSA-6804760	Regulation of TP53 Activity through Methylation	2/46	19/10179	0.00325339961503599	0.0146713817034744	0.00811441271735427	TP53/MDM2	2
R-HSA-9725371	Nuclear events stimulated by ALK signaling in cancer	2/46	19/10179	0.00325339961503599	0.0146713817034744	0.00811441271735427	FN1/NPM1	2
R-HSA-69615	G1/S DNA Damage Checkpoints	3/46	68/10179	0.0035253493491191	0.015797135058078	0.00873704169135446	TP53/MDM2/CDK2	3
R-HSA-167044	Signalling to RAS	2/46	20/10179	0.00360452063398928	0.0158509354587851	0.00876679748835575	NTRK1/GRB2	2
R-HSA-6804115	TP53 regulates transcription of additional cell cycle genes whose exact role in the p53 pathway remain uncertain	2/46	20/10179	0.00360452063398928	0.0158509354587851	0.00876679748835575	TP53/NPM1	2
R-HSA-8876384	Listeria monocytogenes entry into host cells	2/46	20/10179	0.00360452063398928	0.0158509354587851	0.00876679748835575	GRB2/CTNNB1	2
R-HSA-166016	Toll Like Receptor 4 (TLR4) Cascade	4/46	143/10179	0.00385728172628487	0.0168577497667265	0.00932364393877825	APP/JUN/TP53/TNIP2	4
R-HSA-622312	Inflammasomes	2/46	21/10179	0.0039725209144471	0.0172548761191935	0.0095432856323818	APP/HSP90AB1	2
R-HSA-9612973	Autophagy	4/46	147/10179	0.00425616369726052	0.0183741701076857	0.0101623420756156	CFTR/HSPA8/HSP90AA1/HSP90AB1	4
R-HSA-1250196	SHC1 events in ERBB2 signaling	2/46	22/10179	0.00435724749235396	0.0186965528762824	0.0103406447665434	EGFR/GRB2	2
R-HSA-8852276	The role of GTSE1 in G2/M progression after G2 checkpoint	3/46	75/10179	0.00464657573100863	0.0198179254069525	0.0109608508049157	TP53/HSP90AA1/HSP90AB1	3
R-HSA-933542	TRAF6 mediated NF-kB activation	2/46	24/10179	0.00517627260695989	0.0217254978270627	0.0120158863985538	APP/TRIM25	2
R-HSA-9634638	Estrogen-dependent nuclear events downstream of ESR-membrane signaling	2/46	24/10179	0.00517627260695989	0.0217254978270627	0.0120158863985538	EGFR/XPO1	2
R-HSA-9663891	Selective autophagy	3/46	78/10179	0.00518588860561242	0.0217254978270627	0.0120158863985538	CFTR/HSPA8/HSP90AA1	3
R-HSA-2559582	Senescence-Associated Secretory Phenotype (SASP)	3/46	80/10179	0.00556555362072263	0.0231788939027743	0.0128197272254416	JUN/H3C1/CDK2	3
R-HSA-69273	Cyclin A/B1/B2 associated events during G2/M transition	2/46	25/10179	0.0056102701218206	0.0232284868201695	0.0128471559576317	XPO1/CDK2	2
R-HSA-5633007	Regulation of TP53 Activity	4/46	160/10179	0.00574386603484795	0.0236433555387927	0.0130766105566918	TP53/BRCA1/MDM2/CDK2	4
R-HSA-9660826	Purinergic signaling in leishmaniasis infection	2/46	26/10179	0.00606039187958866	0.0246595255790159	0.0136386314531578	APP/HSP90AB1	2
R-HSA-9664424	Cell recruitment (pro-inflammatory response)	2/46	26/10179	0.00606039187958866	0.0246595255790159	0.0136386314531578	APP/HSP90AB1	2
R-HSA-5696399	Global Genome Nucleotide Excision Repair (GG-NER)	3/46	84/10179	0.00637404713327815	0.0257380799175229	0.014235155708175	SUMO2/SUMO1/COPS5	3
R-HSA-168898	Toll-like Receptor Cascades	4/46	165/10179	0.00639816675915824	0.0257380799175229	0.014235155708175	APP/JUN/TP53/TNIP2	4
R-HSA-1538133	G0 and Early G1	2/46	27/10179	0.00652648978988596	0.0258142724650238	0.0142772961001916	MYC/CDK2	2
R-HSA-354192	Integrin signaling	2/46	27/10179	0.00652648978988596	0.0258142724650238	0.0142772961001916	GRB2/FN1	2
R-HSA-5218920	VEGFR2 mediated vascular permeability	2/46	27/10179	0.00652648978988596	0.0258142724650238	0.0142772961001916	HSP90AA1/CTNNB1	2
R-HSA-2029480	Fcgamma receptor (FCGR) dependent phagocytosis	3/46	85/10179	0.0065865456037319	0.0259070793746788	0.014328625523908	GRB2/HSP90AA1/HSP90AB1	3
R-HSA-68886	M Phase	6/46	380/10179	0.00689312682695211	0.0269631701297353	0.0149127256738946	XPO1/SUMO1/HSP90AA1/LMNA/YWHAG/H3C1	6
R-HSA-3371556	Cellular response to heat stress	3/46	88/10179	0.00724928393489947	0.0282005111313672	0.0155970712769381	HSPA8/HSP90AA1/HSP90AB1	3
R-HSA-5339562	Uptake and actions of bacterial toxins	2/46	29/10179	0.00750602649388967	0.0288818845525755	0.0159739236597652	HSP90AA1/HSP90AB1	2
R-HSA-8863795	Downregulation of ERBB2 signaling	2/46	29/10179	0.00750602649388967	0.0288818845525755	0.0159739236597652	EGFR/HSP90AA1	2
R-HSA-182971	EGFR downregulation	2/46	31/10179	0.00854771458561892	0.0325364619710656	0.017995188601303	EGFR/GRB2	2
R-HSA-9022692	Regulation of MECP2 expression and activity	2/46	31/10179	0.00854771458561892	0.0325364619710656	0.017995188601303	HTT/MOV10	2
R-HSA-187042	TRKA activation by NGF	1/46	2/10179	0.00901823559889248	0.0333512213879896	0.0184458137917516	NTRK1	1
R-HSA-192905	vRNP Assembly	1/46	2/10179	0.00901823559889248	0.0333512213879896	0.0184458137917516	HSP90AA1	1
R-HSA-6804754	Regulation of TP53 Expression	1/46	2/10179	0.00901823559889248	0.0333512213879896	0.0184458137917516	TP53	1
R-HSA-9663199	Defective DNA double strand break response due to BRCA1 loss of function	1/46	2/10179	0.00901823559889248	0.0333512213879896	0.0184458137917516	BRCA1	1
R-HSA-9699150	Defective DNA double strand break response due to BARD1 loss of function	1/46	2/10179	0.00901823559889248	0.0333512213879896	0.0184458137917516	BRCA1	1
R-HSA-2871796	FCERI mediated MAPK activation	2/46	32/10179	0.00909150526537005	0.0333512213879896	0.0184458137917516	JUN/GRB2	2
R-HSA-5656169	Termination of translesion DNA synthesis	2/46	32/10179	0.00909150526537005	0.0333512213879896	0.0184458137917516	TRIM25/PCLAF	2
R-HSA-68962	Activation of the pre-replicative complex	2/46	33/10179	0.0096504034987612	0.0352189983356852	0.0194788394006466	MCM2/CDK2	2
R-HSA-187687	Signalling to ERKs	2/46	34/10179	0.0102242677940274	0.0367450842546772	0.0203228833522746	NTRK1/GRB2	2
R-HSA-4085377	SUMOylation of SUMOylation proteins	2/46	34/10179	0.0102242677940274	0.0367450842546772	0.0203228833522746	SUMO2/SUMO1	2
R-HSA-9615710	Late endosomal microautophagy	2/46	34/10179	0.0102242677940274	0.0367450842546772	0.0203228833522746	CFTR/HSPA8	2
R-HSA-5689880	Ub-specific processing proteases	4/46	190/10179	0.0104173574438311	0.0372499447991535	0.0206021104152321	CFTR/TP53/MYC/MDM2	4
R-HSA-432720	Lysosome Vesicle Biogenesis	2/46	35/10179	0.0108129575811459	0.0384702209419663	0.0212770178269573	APP/HSPA8	2
R-HSA-177243	Interactions of Rev with host cellular proteins	2/46	36/10179	0.0114163332066863	0.0404138195516694	0.0223519786994068	XPO1/NPM1	2
R-HSA-176187	Activation of ATR in response to replication stress	2/46	37/10179	0.0120342559286873	0.0421794712748049	0.0233285211332552	MCM2/CDK2	2
R-HSA-8939243	RUNX1 interacts with co-factors whose precise effect on RUNX1 targets is not known	2/46	37/10179	0.0120342559286873	0.0421794712748049	0.0233285211332552	BMI1/RNF2	2
R-HSA-111465	Apoptotic cleavage of cellular proteins	2/46	38/10179	0.0126665879115593	0.0439605109871763	0.0243135743194017	LMNA/CTNNB1	2
R-HSA-3232142	SUMOylation of ubiquitinylation proteins	2/46	38/10179	0.0126665879115593	0.0439605109871763	0.0243135743194017	SUMO1/MDM2	2
R-HSA-5696398	Nucleotide Excision Repair	3/46	110/10179	0.0133084413359631	0.0452900864906722	0.025048932760229	SUMO2/SUMO1/COPS5	3
R-HSA-110313	Translesion synthesis by Y family DNA polymerases bypasses lesions on DNA template	2/46	39/10179	0.0133131922210127	0.0452900864906722	0.025048932760229	TRIM25/PCLAF	2
R-HSA-76009	Platelet Aggregation (Plug Formation)	2/46	39/10179	0.0133131922210127	0.0452900864906722	0.025048932760229	GRB2/FN1	2
R-HSA-167021	PLC-gamma1 signalling	1/46	3/10179	0.0134974692789998	0.0452900864906722	0.025048932760229	NTRK1	1
R-HSA-198745	Signalling to STAT3	1/46	3/10179	0.0134974692789998	0.0452900864906722	0.025048932760229	NTRK1	1
R-HSA-352238	Breakdown of the nuclear lamina	1/46	3/10179	0.0134974692789998	0.0452900864906722	0.025048932760229	LMNA	1
R-HSA-5627083	RHO GTPases regulate CFTR trafficking	1/46	3/10179	0.0134974692789998	0.0452900864906722	0.025048932760229	CFTR	1
R-HSA-9646399	Aggrephagy	2/46	40/10179	0.013973932819013	0.0466676624333076	0.0258108391691799	CFTR/HSP90AA1	2
R-HSA-9020702	Interleukin-1 signaling	3/46	113/10179	0.0143031954849797	0.0475430159782424	0.026294977615085	APP/TP53/TNIP2	3
R-HSA-8875878	MET promotes cell motility	2/46	41/10179	0.01464867455876	0.0484638391944022	0.0268042643180458	GRB2/FN1	2

## Sheet: enrichPathway_Prey_hubs
ID	Description	GeneRatio	BgRatio	pvalue	p.adjust	qvalue	geneID	Count
R-HSA-389957	Prefoldin mediated transfer of substrate to CCT/TriC	12/48	26/7112	1.81901212585166e-20	1.26239441534105e-17	8.76955319621114e-18	CCT3/CCT2/CCT6A/TCP1/TUBA4A/CCT4/CCT7/CCT5/CCT8/TUBB3/ACTB/TUBA1C	12
R-HSA-390450	Folding of actin by CCT/TriC	9/48	10/7112	1.3075122864952e-19	3.69844720350885e-17	2.56922314455795e-17	CCT3/CCT2/CCT6A/TCP1/CCT4/CCT7/CCT5/CCT8/ACTB	9
R-HSA-389958	Cooperation of Prefoldin and TriC/CCT in actin and tubulin folding	12/48	30/7112	1.59875239344763e-19	3.69844720350885e-17	2.56922314455795e-17	CCT3/CCT2/CCT6A/TCP1/TUBA4A/CCT4/CCT7/CCT5/CCT8/TUBB3/ACTB/TUBA1C	12
R-HSA-389960	Formation of tubulin folding intermediates by CCT/TriC	11/48	23/7112	4.92787640584142e-19	8.54986556413487e-17	5.9393878786194e-17	CCT3/CCT2/CCT6A/TCP1/TUBA4A/CCT4/CCT7/CCT5/CCT8/TUBB3/TUBA1C	11
R-HSA-390466	Chaperonin-mediated protein folding	13/48	77/7112	1.39570423385734e-15	1.93723747659399e-13	1.34575271390876e-13	CCT3/CCT2/CCT6A/TCP1/TUBA4A/CCT4/CCT7/CCT5/CCT8/TUBB3/ACTB/CSNK2A1/TUBA1C	13
R-HSA-391251	Protein folding	13/48	83/7112	3.90796760522689e-15	4.5202158633791e-13	3.14008625121739e-13	CCT3/CCT2/CCT6A/TCP1/TUBA4A/CCT4/CCT7/CCT5/CCT8/TUBB3/ACTB/CSNK2A1/TUBA1C	13
R-HSA-6814122	Cooperation of PDCL (PhLP1) and TRiC/CCT in G-protein beta folding	9/48	29/7112	1.19175841591426e-13	1.18154334377785e-11	8.20790006749973e-12	CCT3/CCT2/CCT6A/TCP1/CCT4/CCT7/CCT5/CCT8/CSNK2A1	9
R-HSA-1852241	Organelle biogenesis and maintenance	16/48	269/7112	8.56327975781771e-12	6.81649526596377e-10	4.73525683575217e-10	HSP90AA1/CCT3/CCT2/TCP1/TUBA4A/CCT4/YWHAG/CCT5/HSPA9/CCT8/TUBB3/YWHAE/TUBB/PPP2R1A/ATP5F1B/TUBA1C	16
R-HSA-5617833	Cilium Assembly	14/48	185/7112	8.83983535931901e-12	6.81649526596377e-10	4.73525683575217e-10	HSP90AA1/CCT3/CCT2/TCP1/TUBA4A/CCT4/YWHAG/CCT5/CCT8/TUBB3/YWHAE/TUBB/PPP2R1A/TUBA1C	14
R-HSA-1445148	Translocation of SLC2A4 (GLUT4) to the plasma membrane	10/48	65/7112	9.87095307292885e-12	6.85044143261262e-10	4.75883842884359e-10	TUBA4A/YWHAG/TUBB3/YWHAE/YWHAZ/YWHAB/ACTB/YWHAH/YWHAQ/TUBA1C	10
R-HSA-9755779	SARS-CoV-2 targets host intracellular signalling and regulatory pathways	6/48	12/7112	6.13243530361983e-11	3.54833881201148e-09	2.46494642181292e-09	YWHAG/YWHAE/YWHAZ/YWHAB/YWHAH/YWHAQ	6
R-HSA-390471	Association of TriC/CCT with target proteins during biosynthesis	8/48	36/7112	6.13545615909766e-11	3.54833881201148e-09	2.46494642181292e-09	CCT3/CCT2/CCT6A/TCP1/CCT4/CCT7/CCT5/CCT8	8
R-HSA-75035	Chk1/Chk2(Cds1) mediated inactivation of Cyclin B:Cdk1 complex	6/48	13/7112	1.13311053556555e-10	6.04906701294226e-09	4.20214271489087e-09	YWHAG/YWHAE/YWHAZ/YWHAB/YWHAH/YWHAQ	6
R-HSA-111447	Activation of BAD and translocation to mitochondria	6/48	15/7112	3.27150018747412e-10	1.62172937864789e-08	1.12657675628808e-08	YWHAG/YWHAE/YWHAZ/YWHAB/YWHAH/YWHAQ	6
R-HSA-3371497	HSP90 chaperone cycle for steroid hormone receptors (SHR) in the presence of ligand	8/48	49/7112	8.56524089700277e-10	3.96285145501328e-08	2.75289847777352e-08	HSPA8/HSP90AB1/HSP90AA1/TUBA4A/TUBB3/DNAJA1/FKBP5/TUBA1C	8
R-HSA-5620922	BBSome-mediated cargo-targeting to cilium	6/48	20/7112	2.4699929424003e-09	1.07135943876613e-07	7.44247873433775e-08	CCT3/CCT2/TCP1/CCT4/CCT5/CCT8	6
R-HSA-9013418	RHOBTB2 GTPase cycle	6/48	23/7112	6.33558033771385e-09	2.5864075025726e-07	1.79671566233619e-07	HSP90AB1/HSP90AA1/CCT2/CCT6A/CCT7/CDC37	6
R-HSA-9705683	SARS-CoV-2-host interactions	11/48	179/7112	1.89933091100384e-08	7.32297584575927e-07	5.08709682596351e-07	HSP90AB1/HSP90AA1/YWHAG/UBB/YWHAE/YWHAZ/YWHAB/YWHAH/RPS3A/YWHAQ/LARP1	11
R-HSA-114452	Activation of BH3-only proteins	6/48	29/7112	2.89178562099147e-08	1.05626274787794e-06	7.33760562002268e-07	YWHAG/YWHAE/YWHAZ/YWHAB/YWHAH/YWHAQ	6
R-HSA-109606	Intrinsic Pathway for Apoptosis	7/48	52/7112	4.30728232874211e-08	1.49462696807351e-06	1.03828174029678e-06	C1QBP/YWHAG/YWHAE/YWHAZ/YWHAB/YWHAH/YWHAQ	7
R-HSA-9694516	SARS-CoV-2 Infection	12/48	250/7112	6.18281235850811e-08	2.04327227466887e-06	1.41941256150211e-06	HSP90AB1/HSP90AA1/YWHAG/CANX/UBB/YWHAE/YWHAZ/YWHAB/YWHAH/RPS3A/YWHAQ/LARP1	12
R-HSA-9706574	RHOBTB GTPase Cycle	6/48	35/7112	9.58463637003064e-08	3.02351710945512e-06	2.10036529065743e-06	HSP90AB1/HSP90AA1/CCT2/CCT6A/CCT7/CDC37	6
R-HSA-380320	Recruitment of NuMA to mitotic centrosomes	8/48	90/7112	1.19754598453302e-07	3.50668877224694e-06	2.43601313163825e-06	HSP90AA1/TUBA4A/YWHAG/TUBB3/YWHAE/TUBB/PPP2R1A/TUBA1C	8
R-HSA-9679506	SARS-CoV Infections	13/48	322/7112	1.21268775985485e-07	3.50668877224694e-06	2.43601313163825e-06	HSP90AB1/HSP90AA1/YWHAG/CANX/UBB/YWHAE/YWHAZ/TUBB/YWHAB/YWHAH/RPS3A/YWHAQ/LARP1	13
R-HSA-5357801	Programmed Cell Death	10/48	187/7112	3.41079766389793e-07	8.88449067048271e-06	6.1718439664509e-06	HSP90AA1/C1QBP/YWHAG/CDC37/UBB/YWHAE/YWHAZ/YWHAB/YWHAH/YWHAQ	10
R-HSA-69275	G2/M Transition	10/48	187/7112	3.41079766389793e-07	8.88449067048271e-06	6.1718439664509e-06	HSP90AB1/HSP90AA1/TUBA4A/YWHAG/UBB/TUBB3/YWHAE/TUBB/PPP2R1A/TUBA1C	10
R-HSA-5620920	Cargo trafficking to the periciliary membrane	6/48	43/7112	3.45650213404947e-07	8.88449067048271e-06	6.1718439664509e-06	CCT3/CCT2/TCP1/CCT4/CCT5/CCT8	6
R-HSA-453274	Mitotic G2-G2/M phases	10/48	189/7112	3.76619302666983e-07	9.3347784303888e-06	6.4846481436646e-06	HSP90AB1/HSP90AA1/TUBA4A/YWHAG/UBB/TUBB3/YWHAE/TUBB/PPP2R1A/TUBA1C	10
R-HSA-9663891	Selective autophagy	7/48	74/7112	5.18191711543929e-07	1.24008637176375e-05	8.61458453310778e-06	HSPA8/HSP90AA1/TUBA4A/UBB/TUBB3/CSNK2A1/TUBA1C	7
R-HSA-9614399	Regulation of localization of FOXO transcription factors	4/48	11/7112	5.82283748186821e-07	1.34701640413885e-05	9.35740198840576e-06	YWHAG/YWHAZ/YWHAB/YWHAQ	4
R-HSA-195258	RHO GTPase Effectors	11/48	272/7112	1.34070000317806e-06	3.00143807163089e-05	2.08502750918694e-05	TUBA4A/YWHAG/TUBB3/YWHAE/YWHAZ/YWHAB/ACTB/PPP2R1A/YWHAH/YWHAQ/TUBA1C	11
R-HSA-2565942	Regulation of PLK1 Activity at G2/M Transition	7/48	86/7112	1.45577059217429e-06	3.157202471778e-05	2.19323332636785e-05	HSP90AA1/TUBA4A/YWHAG/UBB/YWHAE/TUBB/PPP2R1A	7
R-HSA-3371556	Cellular response to heat stress	7/48	88/7112	1.70258488593482e-06	3.58058760860233e-05	2.48734889237049e-05	HSPA8/HSP90AB1/HSP90AA1/HSPA5/HSPA9/YWHAE/BAG2	7
R-HSA-5625740	RHO GTPases activate PKNs	6/48	57/7112	1.91613362343672e-06	3.91116686666202e-05	2.71699442580192e-05	YWHAG/YWHAE/YWHAZ/YWHAB/YWHAH/YWHAQ	6
R-HSA-9612973	Autophagy	8/48	141/7112	3.77981439247753e-06	7.49483196679831e-05	5.20648117820965e-05	HSPA8/HSP90AB1/HSP90AA1/TUBA4A/UBB/TUBB3/CSNK2A1/TUBA1C	8
R-HSA-68877	Mitotic Prometaphase	9/48	195/7112	4.83979690204006e-06	9.33005291671056e-05	6.4813654419133e-05	HSP90AA1/TUBA4A/YWHAG/TUBB3/YWHAE/TUBB/PPP2R1A/CSNK2A1/TUBA1C	9
R-HSA-380259	Loss of Nlp from mitotic centrosomes	6/48	68/7112	5.46521658645312e-06	9.98121134473281e-05	6.93370968586019e-05	HSP90AA1/TUBA4A/YWHAG/YWHAE/TUBB/PPP2R1A	6
R-HSA-380284	Loss of proteins required for interphase microtubule organization from the centrosome	6/48	68/7112	5.46521658645312e-06	9.98121134473281e-05	6.93370968586019e-05	HSP90AA1/TUBA4A/YWHAG/YWHAE/TUBB/PPP2R1A	6
R-HSA-9646399	Aggrephagy	5/48	40/7112	6.23514728721719e-06	0.000110953646598173	7.70768544546687e-05	HSP90AA1/TUBA4A/UBB/TUBB3/TUBA1C	5
R-HSA-8854518	AURKA Activation by TPX2	6/48	71/7112	7.04297886857339e-06	0.000122195683369748	8.48864295212266e-05	HSP90AA1/TUBA4A/YWHAG/YWHAE/TUBB/PPP2R1A	6
R-HSA-8852276	The role of GTSE1 in G2/M progression after G2 checkpoint	6/48	72/7112	7.644294001122e-06	0.000129393659433626	8.98866919772497e-05	HSP90AB1/HSP90AA1/TUBA4A/UBB/TUBB3/TUBA1C	6
R-HSA-69473	G2/M DNA damage checkpoint	6/48	74/7112	8.97207857644378e-06	0.000148252917429809	0.000102987769123089	YWHAG/YWHAE/YWHAZ/YWHAB/YWHAH/YWHAQ	6
R-HSA-9613829	Chaperone Mediated Autophagy	4/48	21/7112	1.00495669548207e-05	0.000162195336433618	0.000112673235380854	HSPA8/HSP90AB1/HSP90AA1/UBB	4
R-HSA-109581	Apoptosis	8/48	163/7112	1.10894949995779e-05	0.000174911580220614	0.000121506906933174	C1QBP/YWHAG/UBB/YWHAE/YWHAZ/YWHAB/YWHAH/YWHAQ	8
R-HSA-5628897	TP53 Regulates Metabolic Genes	6/48	79/7112	1.31244554858697e-05	0.000202408269048746	0.000140608201462651	YWHAG/YWHAE/YWHAZ/YWHAB/YWHAH/YWHAQ	6
R-HSA-380270	Recruitment of mitotic centrosome proteins and complexes	6/48	80/7112	1.41166574241908e-05	0.000208445962816775	0.000144802443455306	HSP90AA1/TUBA4A/YWHAG/YWHAE/TUBB/PPP2R1A	6
R-HSA-380287	Centrosome maturation	6/48	80/7112	1.41166574241908e-05	0.000208445962816775	0.000144802443455306	HSP90AA1/TUBA4A/YWHAG/YWHAE/TUBB/PPP2R1A	6
R-HSA-1632852	Macroautophagy	7/48	127/7112	1.96560586784793e-05	0.000284193848393013	0.000197422694621568	HSPA8/HSP90AA1/TUBA4A/UBB/TUBB3/CSNK2A1/TUBA1C	7
R-HSA-5626467	RHO GTPases activate IQGAPs	4/48	28/7112	3.3208025627621e-05	0.00047033407725651	0.000326729876207313	TUBA4A/TUBB3/ACTB/TUBA1C	4
R-HSA-5620912	Anchoring of the basal body to the plasma membrane	6/48	95/7112	3.78306692950484e-05	0.000525089689815272	0.000364767295518572	HSP90AA1/TUBA4A/YWHAG/YWHAE/TUBB/PPP2R1A	6
R-HSA-190828	Gap junction trafficking	4/48	30/7112	4.40095398012229e-05	0.000590882777079417	0.000410472185503372	TUBA4A/TUBB3/ACTB/TUBA1C	4
R-HSA-69481	G2/M Checkpoints	7/48	144/7112	4.43212802024821e-05	0.000590882777079417	0.000410472185503372	YWHAG/UBB/YWHAE/YWHAZ/YWHAB/YWHAH/YWHAQ	7
R-HSA-373760	L1CAM interactions	6/48	98/7112	4.5125053580993e-05	0.000590882777079417	0.000410472185503372	HSPA8/TUBA4A/TUBB3/ACTB/CSNK2A1/TUBA1C	6
R-HSA-157858	Gap junction trafficking and regulation	4/48	32/7112	5.71788517639325e-05	0.000734854131929059	0.000510485655124388	TUBA4A/TUBB3/ACTB/TUBA1C	4
R-HSA-3371511	HSF1 activation	3/48	12/7112	6.08334552286516e-05	0.000767607598703349	0.000533238708032965	HSP90AB1/HSP90AA1/YWHAE	3
R-HSA-3371568	Attenuation phase	3/48	13/7112	7.87087441607963e-05	0.00097542622227844	0.000677605353865502	HSPA8/HSP90AB1/HSP90AA1	3
R-HSA-3371453	Regulation of HSF1-mediated heat shock response	5/48	68/7112	8.57584142579074e-05	0.00104414630692961	0.000725343559189688	HSPA8/HSPA5/HSPA9/YWHAE/BAG2	5
R-HSA-180897	Vpr-mediated induction of apoptosis by mitochondrial outer membrane permeabilization	2/48	3/7112	0.000133247995485427	0.00159438118736011	0.00110757861946145	SLC25A5/SLC25A6	2
R-HSA-68886	M Phase	10/48	370/7112	0.000142306096270388	0.0016739056069771	0.00116282233883742	HSP90AA1/TUBA4A/YWHAG/UBB/TUBB3/YWHAE/TUBB/PPP2R1A/CSNK2A1/TUBA1C	10
R-HSA-190840	Microtubule-dependent trafficking of connexons from Golgi to the plasma membrane	3/48	16/7112	0.000151935420222455	0.00172857674810466	0.00120080107785823	TUBA4A/TUBB3/TUBA1C	3
R-HSA-190872	Transport of connexons to the plasma membrane	3/48	16/7112	0.000151935420222455	0.00172857674810466	0.00120080107785823	TUBA4A/TUBB3/TUBA1C	3
R-HSA-422475	Axon guidance	11/48	456/7112	0.00017246067632585	0.00193044692532484	0.00134103547974939	HSPA8/HSP90AB1/HSP90AA1/TUBA4A/UBB/TUBB3/RPL26L1/ACTB/RPS3A/CSNK2A1/TUBA1C	11
R-HSA-437239	Recycling pathway of L1	4/48	44/7112	0.000203408601027072	0.0022407233192506	0.00155657709724978	TUBA4A/TUBB3/ACTB/TUBA1C	4
R-HSA-450531	Regulation of mRNA stability by proteins that bind AU-rich elements	5/48	82/7112	0.000209170709833255	0.00226819488475436	0.00157566093920445	HSPA8/UBB/HSPB1/YWHAZ/YWHAB	5
R-HSA-1236382	Constitutive Signaling by Ligand-Responsive EGFR Cancer Variants	3/48	18/7112	0.000219300382330534	0.00230188564841633	0.00159906510992671	HSP90AA1/CDC37/UBB	3
R-HSA-5637815	Signaling by Ligand-Responsive EGFR Variants in Cancer	3/48	18/7112	0.000219300382330534	0.00230188564841633	0.00159906510992671	HSP90AA1/CDC37/UBB	3
R-HSA-9675108	Nervous system development	11/48	475/7112	0.00024698850323132	0.00230188564841633	0.00159906510992671	HSPA8/HSP90AB1/HSP90AA1/TUBA4A/UBB/TUBB3/RPL26L1/ACTB/RPS3A/CSNK2A1/TUBA1C	11
R-HSA-1643713	Signaling by EGFR in Cancer	3/48	19/7112	0.000259186740382929	0.00230188564841633	0.00159906510992671	HSP90AA1/CDC37/UBB	3
R-HSA-190861	Gap junction assembly	3/48	19/7112	0.000259186740382929	0.00230188564841633	0.00159906510992671	TUBA4A/TUBB3/TUBA1C	3
R-HSA-9652282	Drug-mediated inhibition of ERBB2 signaling	2/48	4/7112	0.000265347048808799	0.00230188564841633	0.00159906510992671	HSP90AA1/CDC37	2
R-HSA-9665230	Drug resistance in ERBB2 KD mutants	2/48	4/7112	0.000265347048808799	0.00230188564841633	0.00159906510992671	HSP90AA1/CDC37	2
R-HSA-9665233	Resistance of ERBB2 KD mutants to trastuzumab	2/48	4/7112	0.000265347048808799	0.00230188564841633	0.00159906510992671	HSP90AA1/CDC37	2
R-HSA-9665244	Resistance of ERBB2 KD mutants to sapitinib	2/48	4/7112	0.000265347048808799	0.00230188564841633	0.00159906510992671	HSP90AA1/CDC37	2
R-HSA-9665245	Resistance of ERBB2 KD mutants to tesevatinib	2/48	4/7112	0.000265347048808799	0.00230188564841633	0.00159906510992671	HSP90AA1/CDC37	2
R-HSA-9665246	Resistance of ERBB2 KD mutants to neratinib	2/48	4/7112	0.000265347048808799	0.00230188564841633	0.00159906510992671	HSP90AA1/CDC37	2
R-HSA-9665247	Resistance of ERBB2 KD mutants to osimertinib	2/48	4/7112	0.000265347048808799	0.00230188564841633	0.00159906510992671	HSP90AA1/CDC37	2
R-HSA-9665249	Resistance of ERBB2 KD mutants to afatinib	2/48	4/7112	0.000265347048808799	0.00230188564841633	0.00159906510992671	HSP90AA1/CDC37	2
R-HSA-9665250	Resistance of ERBB2 KD mutants to AEE788	2/48	4/7112	0.000265347048808799	0.00230188564841633	0.00159906510992671	HSP90AA1/CDC37	2
R-HSA-9665251	Resistance of ERBB2 KD mutants to lapatinib	2/48	4/7112	0.000265347048808799	0.00230188564841633	0.00159906510992671	HSP90AA1/CDC37	2
R-HSA-9665737	Drug resistance in ERBB2 TMD/JMD mutants	2/48	4/7112	0.000265347048808799	0.00230188564841633	0.00159906510992671	HSP90AA1/CDC37	2
R-HSA-3700989	Transcriptional Regulation by TP53	9/48	328/7112	0.000287973286893688	0.00246732668029901	0.00171399305259661	YWHAG/UBB/YWHAE/YWHAZ/YWHAB/PPP2R1A/YWHAH/CSNK2A1/YWHAQ	9
R-HSA-389977	Post-chaperonin tubulin folding pathway	3/48	20/7112	0.00030348279017114	0.00256850068754599	0.00178427622462621	TUBA4A/TUBB3/TUBA1C	3
R-HSA-9614085	FOXO-mediated transcription	4/48	49/7112	0.000309721829350928	0.00258972228397041	0.00179901836198764	YWHAG/YWHAZ/YWHAB/YWHAQ	4
R-HSA-69620	Cell Cycle Checkpoints	8/48	265/7112	0.000345125791142851	0.00285139641729927	0.00198079714716072	YWHAG/UBB/YWHAE/YWHAZ/YWHAB/PPP2R1A/YWHAH/YWHAQ	8
R-HSA-8863795	Downregulation of ERBB2 signaling	3/48	22/7112	0.000406098788505001	0.00331567716732318	0.00230332192118007	HSP90AA1/CDC37/UBB	3
R-HSA-5336415	Uptake and function of diphtheria toxin	2/48	5/7112	0.000440339266886018	0.00355343547928949	0.00246848695512602	HSP90AB1/HSP90AA1	2
R-HSA-3371571	HSF1-dependent transactivation	3/48	23/7112	0.000464805307339386	0.00370775727923602	0.00257569063232231	HSPA8/HSP90AB1/HSP90AA1	3
R-HSA-9619483	Activation of AMPK downstream of NMDARs	3/48	24/7112	0.00052869477075619	0.00416947921482722	0.00289643785892745	TUBA4A/TUBB3/TUBA1C	3
R-HSA-1268020	Mitochondrial protein import	4/48	57/7112	0.000555049839303231	0.00432814144355553	0.00300665672857339	HSPD1/HSPA9/ATP5F1B/SLC25A6	4
R-HSA-5213460	RIPK1-mediated regulated necrosis	3/48	25/7112	0.000597949874005402	0.00456018914900823	0.0031678547402484	HSP90AA1/CDC37/UBB	3
R-HSA-5675482	Regulation of necroptotic cell death	3/48	25/7112	0.000597949874005402	0.00456018914900823	0.0031678547402484	HSP90AA1/CDC37/UBB	3
R-HSA-9668328	Sealing of the nuclear envelope (NE) by ESCRT-III	3/48	27/7112	0.000753267150456315	0.00568225437409438	0.00394732671520586	TUBA4A/TUBB3/TUBA1C	3
R-HSA-83936	Transport of nucleosides and free purine and pyrimidine bases across the plasma membrane	2/48	7/7112	0.000916764923730157	0.0068412350222444	0.00475244295493392	SLC25A5/SLC25A6	2
R-HSA-8955332	Carboxyterminal post-translational modifications of tubulin	3/48	29/7112	0.000932136930379554	0.0068819471242916	0.00478072468212582	TUBA4A/TUBB3/TUBA1C	3
R-HSA-449147	Signaling by Interleukins	8/48	319/7112	0.00117704048611226	0.00859859049854642	0.00597323592952262	HSPA8/HSP90AA1/TCP1/HSPA9/CANX/UBB/YWHAZ/PPP2R1A	8
R-HSA-9609736	Assembly and cell surface presentation of NMDA receptors	3/48	32/7112	0.00124746467974265	0.00901813008063959	0.00626468008028657	TUBA4A/TUBB3/TUBA1C	3
R-HSA-2995410	Nuclear Envelope (NE) Reassembly	4/48	71/7112	0.00127415489490031	0.00911611852640012	0.00633275031865805	TUBA4A/TUBB3/PPP2R1A/TUBA1C	4
R-HSA-5663220	RHO GTPases Activate Formins	5/48	133/7112	0.00190577340312965	0.0133790928363467	0.00929413699233551	TUBA4A/TUBB3/ACTB/PPP2R1A/TUBA1C	5
R-HSA-5675221	Negative regulation of MAPK pathway	3/48	37/7112	0.00190854494351344	0.0133790928363467	0.00929413699233551	UBB/YWHAB/PPP2R1A	3
R-HSA-5696394	DNA Damage Recognition in GG-NER	3/48	38/7112	0.00206236855064404	0.0143128377414696	0.00994278732836811	UBB/ACTB/RUVBL1	3
R-HSA-9609507	Protein localization	5/48	139/7112	0.00231325660992455	0.0158950503691845	0.0110419127394002	HSPD1/HSPA9/UBB/ATP5F1B/SLC25A6	5
R-HSA-9634285	Constitutive Signaling by Overexpressed ERBB2	2/48	11/7112	0.00236001011135596	0.0160573236988337	0.0111546401548094	HSP90AA1/CDC37	2
R-HSA-1227986	Signaling by ERBB2	3/48	42/7112	0.00275403559606669	0.018556317511362	0.0128906316095917	HSP90AA1/CDC37/UBB	3
R-HSA-447115	Interleukin-12 family signaling	3/48	44/7112	0.00314737577031229	0.0210026806211224	0.0145900617692614	TCP1/HSPA9/CANX	3
R-HSA-168255	Influenza Infection	5/48	150/7112	0.00322056708053118	0.0212864147989394	0.014787165141687	HSP90AA1/CANX/RPL26L1/SLC25A6/RPS3A	5
R-HSA-392517	Rap1 signalling	2/48	13/7112	0.00331823393320335	0.0217250410343691	0.0150918683357213	YWHAZ/YWHAB	2
R-HSA-5218859	Regulated Necrosis	3/48	45/7112	0.0033563203235289	0.0217690308834492	0.0151224270356738	HSP90AA1/CDC37/UBB	3
R-HSA-5637810	Constitutive Signaling by EGFRvIII	2/48	14/7112	0.00385465622644458	0.0245424901023169	0.0170490830681953	HSP90AA1/CDC37	2
R-HSA-5637812	Signaling by EGFRvIII in Cancer	2/48	14/7112	0.00385465622644458	0.0245424901023169	0.0170490830681953	HSP90AA1/CDC37	2
R-HSA-6811436	COPI-independent Golgi-to-ER retrograde traffic	3/48	48/7112	0.00403352027355543	0.0254478460895225	0.0176780122994104	TUBA4A/TUBB3/TUBA1C	3
R-HSA-9609690	HCMV Early Events	4/48	98/7112	0.0041473440333563	0.0259302410734169	0.0180131206000682	TUBA4A/TUBB3/TRIM28/TUBA1C	4
R-HSA-5620924	Intraflagellar transport	3/48	49/7112	0.00427637669382963	0.0264982627278372	0.018407711708402	TUBA4A/TUBB3/TUBA1C	3
R-HSA-1295596	Spry regulation of FGF signaling	2/48	15/7112	0.00442859796699035	0.026903151832016	0.0186889785212549	UBB/PPP2R1A	2
R-HSA-9665348	Signaling by ERBB2 ECD mutants	2/48	15/7112	0.00442859796699035	0.026903151832016	0.0186889785212549	HSP90AA1/CDC37	2
R-HSA-5610787	Hedgehog 'off' state	4/48	100/7112	0.00445801507302859	0.026903151832016	0.0186889785212549	TUBA4A/UBB/TUBB3/TUBA1C	4
R-HSA-9012999	RHO GTPase cycle	8/48	396/7112	0.0045584458878386	0.0272635354523473	0.018939328434969	HSP90AB1/HSP90AA1/CCT2/CCT6A/C1QBP/CCT7/CDC37/ACTB	8
R-HSA-201681	TCF dependent signaling in response to WNT	5/48	163/7112	0.00459630208634674	0.0272635354523473	0.018939328434969	UBB/YWHAZ/PPP2R1A/CSNK2A1/RUVBL1	5
R-HSA-983189	Kinesins	3/48	51/7112	0.00478834441181448	0.028161957811858	0.0195634410402411	TUBA4A/TUBB3/TUBA1C	3
R-HSA-399954	Sema3A PAK dependent Axon repulsion	2/48	16/7112	0.00503954975938577	0.0290082564430571	0.0201513445334752	HSP90AB1/HSP90AA1	2
R-HSA-9665686	Signaling by ERBB2 TMD/JMD mutants	2/48	16/7112	0.00503954975938577	0.0290082564430571	0.0201513445334752	HSP90AA1/CDC37	2
R-HSA-450408	AUF1 (hnRNP D0) binds and destabilizes mRNA	3/48	52/7112	0.00505763548935146	0.0290082564430571	0.0201513445334752	HSPA8/UBB/HSPB1	3
R-HSA-9705671	SARS-CoV-2 activates/modulates innate and adaptive immune responses	4/48	107/7112	0.00566876012082542	0.0322468813430561	0.0224011400805698	HSP90AB1/HSP90AA1/UBB/LARP1	4
R-HSA-2132295	MHC class II antigen presentation	4/48	109/7112	0.00605134088953405	0.0341433380271271	0.0237185633496499	TUBA4A/CANX/TUBB3/TUBA1C	4
R-HSA-425397	Transport of vitamins, nucleosides, and related molecules	2/48	18/7112	0.00637047046980195	0.0355306845580079	0.0246823199265397	SLC25A5/SLC25A6	2
R-HSA-446203	Asparagine N-linked glycosylation	6/48	251/7112	0.00644241751279349	0.0355306845580079	0.0246823199265397	TUBA4A/CANX/UBB/TUBB3/SEC16A/TUBA1C	6
R-HSA-9648025	EML4 and NUDC in mitotic spindle formation	4/48	111/7112	0.00645081592839913	0.0355306845580079	0.0246823199265397	TUBA4A/TUBB3/PPP2R1A/TUBA1C	4
R-HSA-2029482	Regulation of actin dynamics for phagocytic cup formation	3/48	57/7112	0.0065405028396531	0.0357410155174744	0.0248284318322513	HSP90AB1/HSP90AA1/ACTB	3
R-HSA-2467813	Separation of Sister Chromatids	5/48	180/7112	0.00697176861653354	0.0375578232685931	0.0260905248855084	TUBA4A/UBB/TUBB3/PPP2R1A/TUBA1C	5
R-HSA-5654727	Negative regulation of FGFR2 signaling	2/48	19/7112	0.00708944502620418	0.0375578232685931	0.0260905248855084	UBB/PPP2R1A	2
R-HSA-5654732	Negative regulation of FGFR3 signaling	2/48	19/7112	0.00708944502620418	0.0375578232685931	0.0260905248855084	UBB/PPP2R1A	2
R-HSA-9664565	Signaling by ERBB2 KD Mutants	2/48	19/7112	0.00708944502620418	0.0375578232685931	0.0260905248855084	HSP90AA1/CDC37	2
R-HSA-1227990	Signaling by ERBB2 in Cancer	2/48	20/7112	0.00784344083020785	0.0403210958234389	0.0280101044852647	HSP90AA1/CDC37	2
R-HSA-2028269	Signaling by Hippo	2/48	20/7112	0.00784344083020785	0.0403210958234389	0.0280101044852647	YWHAE/YWHAB	2
R-HSA-5654726	Negative regulation of FGFR1 signaling	2/48	20/7112	0.00784344083020785	0.0403210958234389	0.0280101044852647	UBB/PPP2R1A	2
R-HSA-5654733	Negative regulation of FGFR4 signaling	2/48	20/7112	0.00784344083020785	0.0403210958234389	0.0280101044852647	UBB/PPP2R1A	2
R-HSA-2500257	Resolution of Sister Chromatid Cohesion	4/48	119/7112	0.00822395222072427	0.0419663444204606	0.029153019482134	TUBA4A/TUBB3/PPP2R1A/TUBA1C	4
R-HSA-9609646	HCMV Infection	4/48	120/7112	0.00846593564213321	0.0428858345667186	0.0297917673768499	TUBA4A/TUBB3/TRIM28/TUBA1C	4
R-HSA-5358351	Signaling by Hedgehog	4/48	123/7112	0.00921988514474262	0.0463666687713868	0.0322098199564616	TUBA4A/UBB/TUBB3/TUBA1C	4
R-HSA-171319	Telomere Extension By Telomerase	2/48	22/7112	0.00945456006102207	0.0472047818874052	0.0327920371673465	RUVBL2/RUVBL1	2

## Sheet: enrichPathway_Normalized_hubs
ID	Description	GeneRatio	BgRatio	pvalue	p.adjust	qvalue	geneID	Count
R-HSA-156902	Peptide chain elongation	12/37	59/7886	1.50805217680945e-17	1.59099504653397e-15	1.22231597488766e-15	RPL6/RPL18/RPL23/RPS4X/RPL5/RPL14/RPL8/RPL7A/RPL30/RPS13/RPS11/RPS9	12
R-HSA-192823	Viral mRNA Translation	12/37	59/7886	1.50805217680945e-17	1.59099504653397e-15	1.22231597488766e-15	RPL6/RPL18/RPL23/RPS4X/RPL5/RPL14/RPL8/RPL7A/RPL30/RPS13/RPS11/RPS9	12
R-HSA-2408557	Selenocysteine synthesis	12/37	61/7886	2.33291305296394e-17	1.64081551391797e-15	1.26059161458403e-15	RPL6/RPL18/RPL23/RPS4X/RPL5/RPL14/RPL8/RPL7A/RPL30/RPS13/RPS11/RPS9	12
R-HSA-156842	Eukaryotic Translation Elongation	12/37	63/7886	3.55245441341687e-17	1.83965486239836e-15	1.41335419710326e-15	RPL6/RPL18/RPL23/RPS4X/RPL5/RPL14/RPL8/RPL7A/RPL30/RPS13/RPS11/RPS9	12
R-HSA-72764	Eukaryotic Translation Termination	12/37	64/7886	4.35937171184446e-17	1.83965486239836e-15	1.41335419710326e-15	RPL6/RPL18/RPL23/RPS4X/RPL5/RPL14/RPL8/RPL7A/RPL30/RPS13/RPS11/RPS9	12
R-HSA-975956	Nonsense Mediated Decay (NMD) independent of the Exon Junction Complex (EJC)	12/37	66/7886	6.49604004577765e-17	2.28444074943181e-15	1.75507046850835e-15	RPL6/RPL18/RPL23/RPS4X/RPL5/RPL14/RPL8/RPL7A/RPL30/RPS13/RPS11/RPS9	12
R-HSA-9633012	Response of EIF2AK4 (GCN2) to amino acid deficiency	12/37	71/7886	1.66464978242988e-16	5.0177300584672e-15	3.85497844352182e-15	RPL6/RPL18/RPL23/RPS4X/RPL5/RPL14/RPL8/RPL7A/RPL30/RPS13/RPS11/RPS9	12
R-HSA-72689	Formation of a pool of free 40S subunits	12/37	72/7886	1.99169049671435e-16	5.25308368508409e-15	4.03579390123697e-15	RPL6/RPL18/RPL23/RPS4X/RPL5/RPL14/RPL8/RPL7A/RPL30/RPS13/RPS11/RPS9	12
R-HSA-1799339	SRP-dependent cotranslational protein targeting to membrane	12/37	75/7886	3.35681979118576e-16	7.86987751044662e-15	6.0462017291533e-15	RPL6/RPL18/RPL23/RPS4X/RPL5/RPL14/RPL8/RPL7A/RPL30/RPS13/RPS11/RPS9	12
R-HSA-156827	L13a-mediated translational silencing of Ceruloplasmin expression	12/37	82/7886	1.04277966131677e-15	2.1371244488116e-14	1.64189156955344e-14	RPL6/RPL18/RPL23/RPS4X/RPL5/RPL14/RPL8/RPL7A/RPL30/RPS13/RPS11/RPS9	12
R-HSA-2408522	Selenoamino acid metabolism	12/37	83/7886	1.21542622681229e-15	2.1371244488116e-14	1.64189156955344e-14	RPL6/RPL18/RPL23/RPS4X/RPL5/RPL14/RPL8/RPL7A/RPL30/RPS13/RPS11/RPS9	12
R-HSA-72706	GTP hydrolysis and joining of the 60S ribosomal subunit	12/37	83/7886	1.21542622681229e-15	2.1371244488116e-14	1.64189156955344e-14	RPL6/RPL18/RPL23/RPS4X/RPL5/RPL14/RPL8/RPL7A/RPL30/RPS13/RPS11/RPS9	12
R-HSA-927802	Nonsense-Mediated Decay (NMD)	12/37	86/7886	1.90189413499108e-15	2.8664261605937e-14	2.20219320893704e-14	RPL6/RPL18/RPL23/RPS4X/RPL5/RPL14/RPL8/RPL7A/RPL30/RPS13/RPS11/RPS9	12
R-HSA-975957	Nonsense Mediated Decay (NMD) enhanced by the Exon Junction Complex (EJC)	12/37	86/7886	1.90189413499108e-15	2.8664261605937e-14	2.20219320893704e-14	RPL6/RPL18/RPL23/RPS4X/RPL5/RPL14/RPL8/RPL7A/RPL30/RPS13/RPS11/RPS9	12
R-HSA-72613	Eukaryotic Translation Initiation	12/37	89/7886	2.92657512424389e-15	3.85942094509663e-14	2.96508269166815e-14	RPL6/RPL18/RPL23/RPS4X/RPL5/RPL14/RPL8/RPL7A/RPL30/RPS13/RPS11/RPS9	12
R-HSA-72737	Cap-dependent Translation Initiation	12/37	89/7886	2.92657512424389e-15	3.85942094509663e-14	2.96508269166815e-14	RPL6/RPL18/RPL23/RPS4X/RPL5/RPL14/RPL8/RPL7A/RPL30/RPS13/RPS11/RPS9	12
R-HSA-168273	Influenza Viral RNA Transcription and Replication	12/37	96/7886	7.54352322370664e-15	9.36284353060059e-14	7.19320480774503e-14	RPL6/RPL18/RPL23/RPS4X/RPL5/RPL14/RPL8/RPL7A/RPL30/RPS13/RPS11/RPS9	12
R-HSA-168255	Influenza Infection	12/37	116/7886	7.82807516758961e-14	9.17624366867449e-13	7.04984547256609e-13	RPL6/RPL18/RPL23/RPS4X/RPL5/RPL14/RPL8/RPL7A/RPL30/RPS13/RPS11/RPS9	12
R-HSA-9711097	Cellular response to starvation	12/37	123/7886	1.60338267641967e-13	1.780598656445e-12	1.36798300370431e-12	RPL6/RPL18/RPL23/RPS4X/RPL5/RPL14/RPL8/RPL7A/RPL30/RPS13/RPS11/RPS9	12
R-HSA-6791226	Major pathway of rRNA processing in the nucleolus and cytosol	12/37	133/7886	4.15096133941164e-13	4.37926421307929e-12	3.36446340141786e-12	RPL6/RPL18/RPL23/RPS4X/RPL5/RPL14/RPL8/RPL7A/RPL30/RPS13/RPS11/RPS9	12
R-HSA-9010553	Regulation of expression of SLITs and ROBOs	12/37	138/7886	6.49091446220773e-13	6.52182357869444e-12	5.01053046205509e-12	RPL6/RPL18/RPL23/RPS4X/RPL5/RPL14/RPL8/RPL7A/RPL30/RPS13/RPS11/RPS9	12
R-HSA-8868773	rRNA processing in the nucleus and cytosol	12/37	141/7886	8.41765708455478e-13	8.07329838564118e-12	6.20248416756668e-12	RPL6/RPL18/RPL23/RPS4X/RPL5/RPL14/RPL8/RPL7A/RPL30/RPS13/RPS11/RPS9	12
R-HSA-72312	rRNA processing	12/37	148/7886	1.50944849423469e-12	1.38475492297182e-11	1.06386758861392e-11	RPL6/RPL18/RPL23/RPS4X/RPL5/RPL14/RPL8/RPL7A/RPL30/RPS13/RPS11/RPS9	12
R-HSA-72766	Translation	13/37	210/7886	4.7438894292329e-12	4.17066945653393e-11	3.20420601799065e-11	RPL6/RPL18/RPL23/RPS4X/RPL5/RPL14/RPL8/MRPL58/RPL7A/RPL30/RPS13/RPS11/RPS9	13
R-HSA-376176	Signaling by ROBO receptors	12/37	182/7886	1.78032944048819e-11	1.50259804777203e-10	1.15440308983234e-10	RPL6/RPL18/RPL23/RPS4X/RPL5/RPL14/RPL8/RPL7A/RPL30/RPS13/RPS11/RPS9	12
R-HSA-71291	Metabolism of amino acids and derivatives	13/37	273/7886	1.30784981836156e-10	1.0613704295165e-09	8.15420534525021e-10	RPL6/RPL18/RPL23/RPS4X/PDHA1/RPL5/RPL14/RPL8/RPL7A/RPL30/RPS13/RPS11/RPS9	13
R-HSA-422475	Axon guidance	12/37	452/7886	5.41258897407398e-07	4.22983805010966e-06	3.24966355558438e-06	RPL6/RPL18/RPL23/RPS4X/RPL5/RPL14/RPL8/RPL7A/RPL30/RPS13/RPS11/RPS9	12
R-HSA-9675108	Nervous system development	12/37	471/7886	8.41903997115587e-07	6.34434797826389e-06	4.87418103593235e-06	RPL6/RPL18/RPL23/RPS4X/RPL5/RPL14/RPL8/RPL7A/RPL30/RPS13/RPS11/RPS9	12
R-HSA-9754678	SARS-CoV-2 modulates host translation machinery	4/37	38/7886	2.70139663020286e-05	0.000196549892749242	0.000151003659183753	RPS4X/RPS13/RPS11/RPS9	4
R-HSA-72695	Formation of the ternary complex, and subsequently, the 43S complex	4/37	40/7886	3.32224758114279e-05	0.000233664746540376	0.000179517939472277	RPS4X/RPS13/RPS11/RPS9	4
R-HSA-72649	Translation initiation complex formation	4/37	47/7886	6.33371261904646e-05	0.000417629175818376	0.000320852547149064	RPS4X/RPS13/RPS11/RPS9	4
R-HSA-72702	Ribosomal scanning and start codon recognition	4/37	47/7886	6.33371261904646e-05	0.000417629175818376	0.000320852547149064	RPS4X/RPS13/RPS11/RPS9	4
R-HSA-72662	Activation of the mRNA upon binding of the cap-binding complex and eIFs, and subsequent binding to 43S	4/37	48/7886	6.88639943277521e-05	0.000440312206156233	0.00033827927038194	RPS4X/RPS13/RPS11/RPS9	4
R-HSA-9705683	SARS-CoV-2-host interactions	5/37	177/7886	0.00131056613213634	0.00813321923178729	0.00624851963928782	TRIM25/RPS4X/RPS13/RPS11/RPS9	5
R-HSA-9694516	SARS-CoV-2 Infection	5/37	243/7886	0.00519062716474561	0.0312920666217521	0.0240407994998744	TRIM25/RPS4X/RPS13/RPS11/RPS9	5
R-HSA-72163	mRNA Splicing - Major Pathway	4/37	170/7886	0.00790850470388873	0.0463526247922367	0.0356113954502592	HNRNPL/ELAVL1/EFTUD2/SRRM2	4

## Sheet: enrichPathway_Y2H_hubs
ID	Description	GeneRatio	BgRatio	pvalue	p.adjust	qvalue	geneID	Count
R-HSA-6805567	Keratinization	7/28	131/4352	1.33232872992817e-05	0.0022516355535786	0.00210367694199184	KRTAP10-8/KRT31/LOC100653049/KRTAP1-1/KRTAP6-2/KRTAP1-3/KRTAP5-9	7
